# Supplementary material for: Discrimination between alkyl and aryl substituents of chiral monoamines by m-phthalic diamide-linked zinc bisporphyrinates
Source: Royal Society of Chemistry journal article supplement (doi:10.1039/c5dt01767j), 2015-01-01
Supplement: c5dt01767j1.pdf [file c5dt01767j1.pdf]

## Supporting Information

### Discrimination between alkyl and aryl substituents of chiral monoamines by *m*-phthalic diamide-linked zinc bisporphyrinates

Xianshi Fang, Zhen Han, Chenglong Xu, Xiaohong Li, Yong Wang,\* and Chuanjiang Hu\*

|                                                                                                          |     |
|----------------------------------------------------------------------------------------------------------|-----|
| Experimental section.....                                                                                | S2  |
| CD spectra (Fig. S1-S19).....                                                                            | S8  |
| UV-vis spectra of [Zn <sub>2</sub> -1], [Zn <sub>2</sub> -2], [Zn <sub>2</sub> -3] (Fig. S20) .....      | S18 |
| ORTEP diagram and packing diagrams for [Cu <sub>2</sub> -2] (Fig. S21-S23) .....                         | S19 |
| Packing diagrams for [Zn <sub>2</sub> -3] (Fig. S24) .....                                               | S21 |
| NMR spectra (Fig. S25-S30) .....                                                                         | S22 |
| DFT optimized structure of [Zn <sub>2</sub> -1] (Fig. S31) .....                                         | S26 |
| Relative energies of calculated host-guest compounds (Fig. S32-S33) ....                                 | S27 |
| Optimized structures of the complexes, <b>conformer I•5S</b> and <b>conformer II•5S</b> (Fig. S34) ..... | S29 |
| Crystal data and structural refinements (Table S1) .....                                                 | S30 |
| Selected bond distances for [Zn <sub>2</sub> -3] (Table S2) .....                                        | S31 |
| The absolute energies and gartesian coordinates for geometry optimized structures .....                  | S32 |

## **Experimental section**

### **Materials and methods**

All reagents and solvents were purchased from commercial sources and used as received unless otherwise noted. Triethylamine (Et<sub>3</sub>N) was distilled over potassium hydroxide and methylene dichloride was treated with CaH<sub>2</sub> before use. The synthesis of the bisporphyrin [Zn<sub>2</sub>-1] is accomplished by following the literature method.<sup>1</sup>

Elemental analyses (C, H and N) were performed with an ElementarVario EL III analytical instrument. <sup>1</sup>H NMR titration and <sup>1</sup>H NMR spectra were obtained at room temperature, using a Bruker AVANCE 400 MHz spectrometer in CDCl<sub>3</sub> with tetramethylsilane (TMS) as the internal standard; chemical shifts are expressed in ppm relative to TMS (0 ppm). Two-dimensional NMR spectra were recorded on Agilent 600MHz NMR instrument. Mass spectra were taken with Finnigan Accurate-Mass LCQ™. CD spectra were measured on an AVIV Model 410 spectropolarimeter. Scanning conditions were as follows: wavelength step=0.50 nm, bandwidth=2 nm, response time=0.1 s, averaging time=1.00 seconds, settling time=0.333 seconds.

### **General procedure for CD measurement**

The background spectrum was taken from 390 nm to 440 nm with a scan rate of 100 nm/min at 295 K. Zinc bisporphyrinate solution (1.00 to 2.00×10<sup>-6</sup> M, 2.50 mL) was injected into a 1 cm quartz cuvette. Then 1500 equivalents of the optically active monoamines were added into the above solution to form the corresponding complex. The CD spectra were measured after several minutes (minimum of 4 accumulations). The resultant ECCD spectra recorded in millidegrees were normalized based on the zinc bisporphyrinate concentration.

### **<sup>1</sup>H NMR and CD titrations**

The CD titration experiments were carried out as follows. Measurements have been performed by adding different aliquots of the optically active monoamines solution to the zinc-bisporphyrin solution in DCM at room temperature. Then the CD spectra were taken after each addition. The resultant ECD spectra recorded in millidegrees were normalized based on the zinc bisporphyrinate concentration.

<sup>1</sup>H NMR titration experiments were done as follows. Portions of a solution of the chiral monoamine in CDCl<sub>3</sub> were added to the solution of bisporphyrin (0.50 mL) in CDCl<sub>3</sub> in a 5 mm o.d. NMR tube and <sup>1</sup>H NMR spectra were taken after each addition.

### **Preparation of free base bisporphyrin 2**

A solution of 5-methylisophthalic acid (0.080 g, 0.44 mmol) in thionyl chloride (8 mL) was refluxed under nitrogen for four hours, followed by the removal of excess reagent under reduced pressure. The residual white solid was redissolved in CH<sub>2</sub>Cl<sub>2</sub> (30 mL), and Et<sub>3</sub>N (150 μL, 1.07 mmol) was added to the above solution and stirred for 10 minutes in an ice bath. 5-(2-aminophenyl)-10,15,20-triphenyl-porphyrinate (0.50 g, 0.78 mmol) was added to the solution under nitrogen atmosphere overnight in an ice bath. Then the mixture was washed by water for three times, dried with Na<sub>2</sub>SO<sub>4</sub>, purified by silica gel chromatography (pure CH<sub>2</sub>Cl<sub>2</sub>) to give the pure product (0.394 g, yield 72%). <sup>1</sup>H NMR (400 MHz, CDCl<sub>3</sub>): δ 8.84 (4H, d), 8.79 (4H, d), 8.65 (4H, d), 8.56 (4H, d), 8.27 (2H, d), 8.21 (2H, d), 8.17 (2H, d), 8.09 (4H, s), 7.99 (2H, d), 7.93 (4H, d), 7.82 (2H, m), 7.78 (4H, t), 7.69 (10H, m), 7.51 (4H, s), 7.46 (2H, t), 7.08 (2H, s), 6.29 (1H, s), 5.09 (2H, s), -0.36 (3H, s), -2.28 (4H, s). Anal. Calcd for C<sub>97</sub>H<sub>66</sub>N<sub>10</sub>O<sub>2</sub>: C, 83.00; H, 4.74; N, 9.98. Found: C, 83.31; H, 4.71; N, 9.99. MS (ESI) m/z (C<sub>97</sub>H<sub>66</sub>N<sub>10</sub>O<sub>2</sub>): Calc. [M+H]<sup>+</sup>: 1404.54, Found [M+H]<sup>+</sup>: 1404.83.

### **Preparation of zinc bisporphyrinate [Zn<sub>2</sub>-2]**

The free base bisporphyrin **2** (0.394 g, 0.28 mmol) was dissolved in  $\text{CHCl}_3$  (150 mL) and  $\text{CH}_3\text{OH}$  (50 mL).  $\text{Zn}(\text{CH}_3\text{COO})_2$  (0.25 g, 1.4 mmol) was added to the above solution and refluxed for two hours. Then it was washed by water, and the organic layer was evaporated to dryness under vacuum. The purple solid was obtained and purified by silica gel chromatography ( $\text{CH}_2\text{Cl}_2:\text{CH}_3\text{OH}=50:1$ ) (0.411 g, yield 96%).  $^1\text{H}$  NMR (400 MHz,  $\text{DMSO}-d_6$ ):  $\delta$  8.74 (4H, d), 8.68 (4H, d), 8.60 (4H, d), 8.53 (4H, d), 8.16 (2H, d), 8.07 (8H, m), 7.89 (2H, d), 7.81 (11H, m), 7.70 (11H, m), 7.58 (2H, d), 7.44 (4H, d), 6.68 (1H, s), 5.10 (2H, s), -0.21 (3H, s). Anal. Calcd for  $\text{C}_{97}\text{H}_{62}\text{N}_{10}\text{O}_2\text{Zn}_2\cdot\text{H}_2\text{O}$ : C, 75.24; H, 4.17; N, 9.05. Found: C, 75.27; H, 4.15; N, 9.07. MS (ESI)  $m/z$  ( $\text{C}_{97}\text{H}_{62}\text{N}_{10}\text{O}_2\text{Zn}_2$ ): Calc.  $[\text{M}+\text{H}]^+$ : 1531.36, Found  $[\text{M}+\text{H}]^+$ : 1531.25.

### **Preparation of copper bisporphyrinate [ $\text{Cu}_2\text{-2}$ ]**

The free base bisporphyrin **2** (0.394 g, 0.28 mmol) was dissolved in  $\text{CHCl}_3$  (150 mL) and  $\text{CH}_3\text{OH}$  (50 mL).  $\text{Cu}(\text{CH}_3\text{COO})_2$  (0.25 g, 1.4 mmol) was added to the above solution and refluxed for two hours. Then it was washed by water, and the organic layer was evaporated to dryness under the vacuum. The purple solid was obtained and purified by silica gel chromatography ( $\text{CH}_2\text{Cl}_2:\text{CH}_3\text{OH}=50:1$ ) (0.402 g, yield 94%). Anal. Calcd for  $\text{C}_{97}\text{H}_{62}\text{Cu}_2\text{N}_{10}\text{O}_2\cdot 2\text{H}_2\text{O}$ : C, 74.55; H, 4.26; N, 8.96. Found: C, 74.53; H, 4.27; N, 8.99. MS (ESI)  $m/z$   $\text{C}_{97}\text{H}_{62}\text{Cu}_2\text{N}_{10}\text{O}_2$ : Calc.  $[\text{M}+\text{H}]^+$ : 1527.37, Found  $[\text{M}+\text{H}]^+$ : 1527.33. [ $\text{Cu}_2\text{-2}$ ] was dissolved in  $\text{CH}_2\text{Cl}_2$  and transferred into 8 mm $\times$ 250 mm glass tubes, and layered by *n*-hexane. X-ray quality crystals were obtained after two months.

### **Preparation of free base bisporphyrin 3**

A solution of 5-tertiary butyl isophthalic acid (0.080 g, 0.36 mmol) in thionyl chloride (8 mL) was refluxed under nitrogen for four hours, followed by the removal of excess reagent under reduced pressure. The residual white solid was redissolved in  $\text{CH}_2\text{Cl}_2$  (30 mL), and  $\text{Et}_3\text{N}$  (150  $\mu\text{L}$ , 1.07 mmol) was added

to the above solution and stirred for 10 minutes in an ice bath. 5-(2-aminophenyl)-10,15,20-triphenyl-porphyrinate (0.50 g, 0.78 mmol) was added to the solution under nitrogen atmosphere overnight in an ice bath. Then the mixture was washed by water for three times, dried with Na<sub>2</sub>SO<sub>4</sub>, purified by silica gel chromatography (pure CH<sub>2</sub>Cl<sub>2</sub>) to give the pure product (0.271 g, yield 48%). <sup>1</sup>H NMR (400 MHz, CDCl<sub>3</sub>): δ 8.82 (4H, d), 8.78 (4H, d), 8.64 (4H, d), 8.52 (4H, d), 8.27 (2H, d), 8.18 (4H, d), 8.07 (4H, d), 7.97 (6H, m), 7.74 (16H, m), 7.60 (4H, t), 7.44 (2H, t), 7.03 (2H, s), 6.27 (1H, s), 5.14 (2H, s), -1.86 (9H, s), -2.93 (4H, s). Anal. Calcd for C<sub>100</sub>H<sub>72</sub>N<sub>10</sub>O<sub>2</sub>: C, 83.08; H, 5.02; N, 9.69. Found: C, 83.07; H, 4.99; N, 9.71. MS (ESI) m/z (C<sub>100</sub>H<sub>72</sub>N<sub>10</sub>O<sub>2</sub>): Calc. [M+H]<sup>+</sup>: 1446.59, Found [M+H]<sup>+</sup>: 1446.92.

### Preparation of zinc bisporphyrinate [Zn<sub>2</sub>-3]

The free base bisporphyrin **3** (0.271 g, 0.19 mmol) was dissolved in CHCl<sub>3</sub> (150 mL) and CH<sub>3</sub>OH (50 mL). Zn(CH<sub>3</sub>COO)<sub>2</sub> (0.25 g, 1.4 mmol) was added to the above solution and refluxed for two hours. Then it was washed by water, and the organic layer was evaporated to dryness under vacuum. The purple solid was obtained and purified by silica gel chromatography (CH<sub>2</sub>Cl<sub>2</sub>:CH<sub>3</sub>OH=50:1) (0.284 g, yield 95%). <sup>1</sup>H NMR (400 MHz, CDCl<sub>3</sub>): δ 8.98 (4H, d), 8.93 (4H, d), 8.72 (4H, d), 8.49 (4H, d), 8.26 (2H, s), 8.13 (6H, m), 7.99 (2H, d), 7.92 (4H, d), 7.74 (14H, m), 7.57 (6H, d), 7.45 (2H, t), 7.08 (2H, d), 6.94 (2H, s), 5.25 (2H, s), 3.89 (1H, s), -1.48 (9H, s). Anal. Calcd for C<sub>100</sub>H<sub>68</sub>N<sub>10</sub>O<sub>2</sub>Zn<sub>2</sub>·2H<sub>2</sub>O: C, 74.67; H, 4.51; N, 8.71. Found: C, 74.65; H, 4.49; N, 8.74. MS (ESI) m/z (C<sub>100</sub>H<sub>68</sub>N<sub>10</sub>O<sub>2</sub>Zn<sub>2</sub>): Calc. [M+H]<sup>+</sup>: 1573.41, Found [M+H]<sup>+</sup>: 1573.58. [Zn<sub>2</sub>-3] was dissolved in CH<sub>2</sub>Cl<sub>2</sub> and transferred into 8 mm×250 mm glass tubes, layered by *n*-heptane. X-ray quality crystals were obtained after three weeks.

### X-ray structure determination

The measurements of a single crystal of [Cu<sub>2</sub>-**2**] were made on Agilent Xcalibur diffractometer with an Atlas (Gemini Ultra Cu) detector by using graphite monochromated Cu Ka ( $\lambda=0.154178$  nm) at 220(2) K. The measurements of a single crystal of [Zn<sub>2</sub>-**3**] were made on a Bruker APEX-II CCD X-ray diffractometer by using graphite monochromated Mo Ka ( $\lambda=0.071073$  nm) at 220(2) K. Both structures were solved by direct methods and refined on  $F^2$  using full matrix least-squares methods with SHELXTL version 97.<sup>2</sup> All non-hydrogen atoms were refined anisotropically. In the asymmetric unit, all the hydrogen atoms were theoretically added and riding on their parent atoms. Complete crystallographic details, atomic coordinates, anisotropic thermal parameters, and fixed hydrogen atom coordinates are given in the CIF file. For [Cu<sub>2</sub>-**2**], the asymmetric unit contains a half molecule of compound **2** and badly disorder solvent molecules. While SQUEEZE<sup>3</sup> was used to model all disordered solvate. Electron counts within the interporphyrin voids of 399 e (corresponding to roughly to 2 molecules of CH<sub>2</sub>Cl<sub>2</sub> and 2 molecules of H<sub>2</sub>O per compound **2**). One phenyl ring was found disordered over two positions. The final refinement gave the occupancy of the major component of 60%. For [Zn<sub>2</sub>-**3**], the asymmetric unit contains two molecules of compound **3** and badly disorder solvent molecules. While SQUEEZE<sup>12</sup> was used to model all disordered solvate. Electron counts within the interporphyrin voids of 1831 e (corresponding to roughly to 3 molecules of CH<sub>2</sub>Cl<sub>2</sub> and 2 molecules of C<sub>7</sub>H<sub>16</sub> per compound **3**). Details of the crystal parameters, data collection, and refinements are summarized in Table S1.

### **Computation methods.**

Firstly, we performed DFT calculations on the free host [Zn<sub>2</sub>-**1**] based on the crystal structure of [Zn<sub>2</sub>-**1**]. Due to the asymmetric arrangement, the host molecules exist as a pair of enantiomers, conformers I and II as shown in Fig. S31. Then we did calculations on the corresponding host-guest complexes

formed between [Zn<sub>2</sub>-1] (both conformers I and II ) and chiral monoamine **1S** or **5S**.

Full optimizations on all conformations of possible complexes studied were performed at the semi-empirical Parameterized Model (PM6) with Gaussian09 programs.<sup>4</sup> Some relatively stable minima's by PM6 were then subjected to geometry optimization at the B3LYP/6-31G\* (gas phase) level of theory. The local minima with lowest energy at the level of B3LYP/6-31G\* are reported in the current communication. We employed the density functional theory (DFT) with no symmetry constraints to investigate the optimized geometries. To confirm that each structure was a true minimum, vibrational analyses were performed.

## References

- (1) J. Jiang, X. Fang, B. Liu and C. Hu, *Inorg. Chem.* 2014, **53**, 3298
- (2) G. M. Sheldrick, *Acta Crystallogr. Sect.A* 2008, **64**, 112.
- (3) A. L. Spek, *J. Appl. Crystallogr.* 2003, **36**, 7.
- (4) M. J. Frisch, G. W. Trucks, H. B. Schlegel, G. E. Scuseria, M. A. Robb, J. R. Cheeseman, G. Scalmani, V. Barone, B. Mennucci, G. A. Petersson, H. Nakatsuji, M. Caricato, X. Li, H. P. Hratchian, A. F. Izmaylov, J. Bloino, G. Zheng, J. L. Sonnenberg, M. Hada, M. Ehara, K. Toyota, R. Fukuda, J. Hasegawa, M. Ishida, T. Nakajima, Y. Honda, O. Kitao, H. Nakai, T. Vreven, J. A. Montgomery, Jr., J. E. Peralta, F. Ogliaro, M. Bearpark, J. J. Heyd, E. Brothers, K. N. Kudin, V. N. Staroverov, R. Kobayashi, J. Normand, K. Raghavachari, A. Rendell, J. C. Burant, S. S. Iyengar, J. Tomasi, M. Cossi, N. Rega, J. M. Millam, M. Klene, J. E. Knox, J. B. Cross, V. Bakken, C. Adamo, J. Jaramillo, R. Gomperts, R. E. Stratmann, O. Yazyev, A. J. Austin, R. Cammi, C. Pomelli, J. W. Ochterski, R. L. Martin, K. Morokuma, V. G. Zakrzewski, G. A. Voth, P. Salvador, J. J. Dannenberg, S. Dapprich, A. D. Daniels, O. Farkas, J. B. Foresman, J. V. Ortiz, J. Cioslowski, and D. J. Fox, Gaussian 09, Revision C.01, Gaussian, Inc., Wallingford CT, 2010.

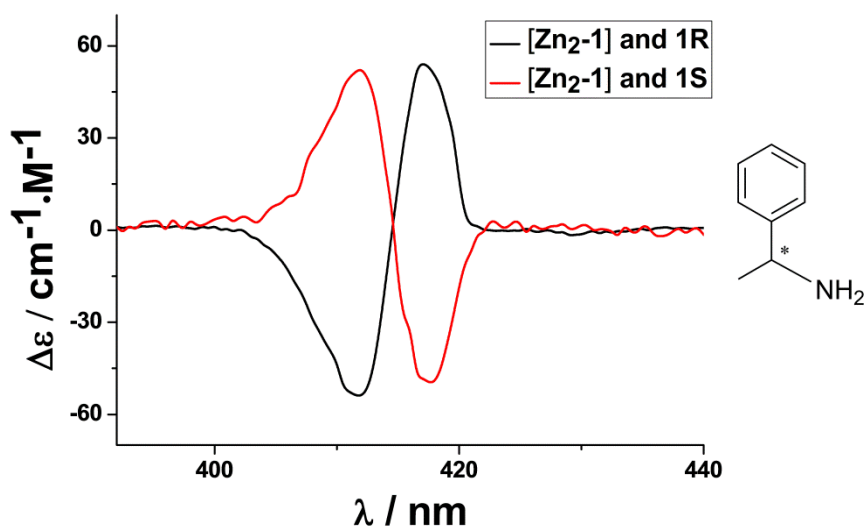

**Fig. S1.** Circular dichroism spectra of a solution of [Zn<sub>2</sub>-1] ( $1.63 \times 10^{-6}$  M) and 1500 equivalents of **1R** (black) and **1S** (red) in CH<sub>2</sub>Cl<sub>2</sub> at 295 K

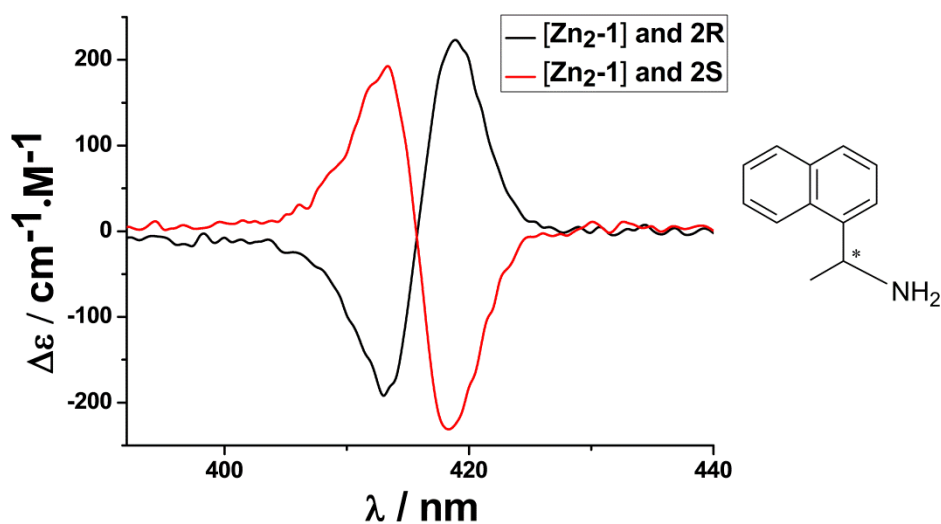

**Fig. S2.** Circular dichroism spectra of a solution of [Zn<sub>2</sub>-1] ( $1.63 \times 10^{-6}$  M) and 1500 equivalents of **2R** (black) and **2S** (red) in CH<sub>2</sub>Cl<sub>2</sub> at 295 K



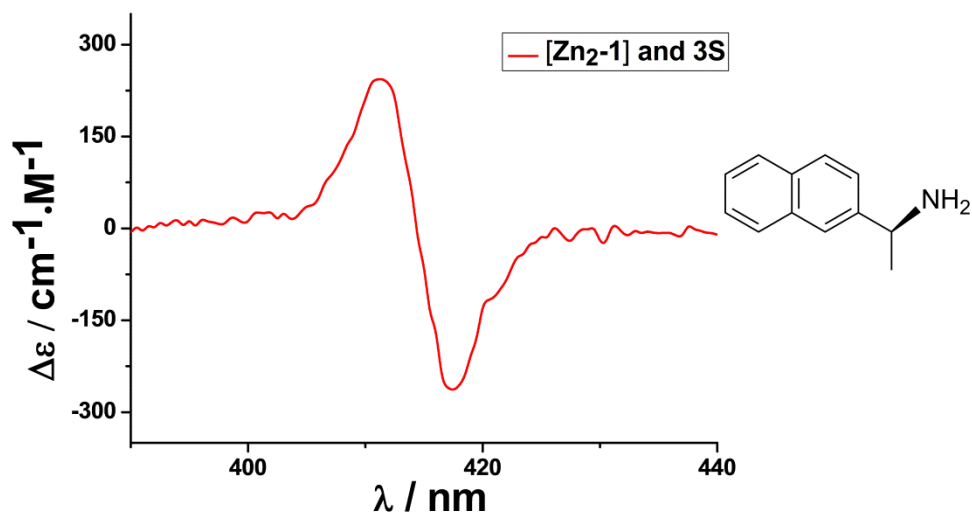

**Fig. S3.** Circular dichroism spectrum of a solution of  $[Zn_2-1]$  ( $1.63 \times 10^{-6}$  M) and 1500 equivalents of **3S** in  $CH_2Cl_2$  at 295 K

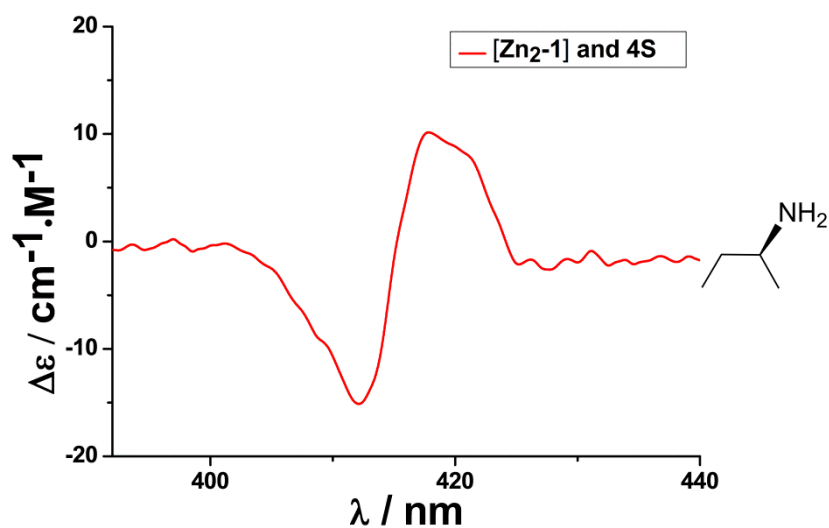

**Fig. S4.** Circular dichroism spectrum of a solution of  $[Zn_2-1]$  ( $1.63 \times 10^{-6}$  M) and 1500 equivalents of **4S** in  $CH_2Cl_2$  at 295 K

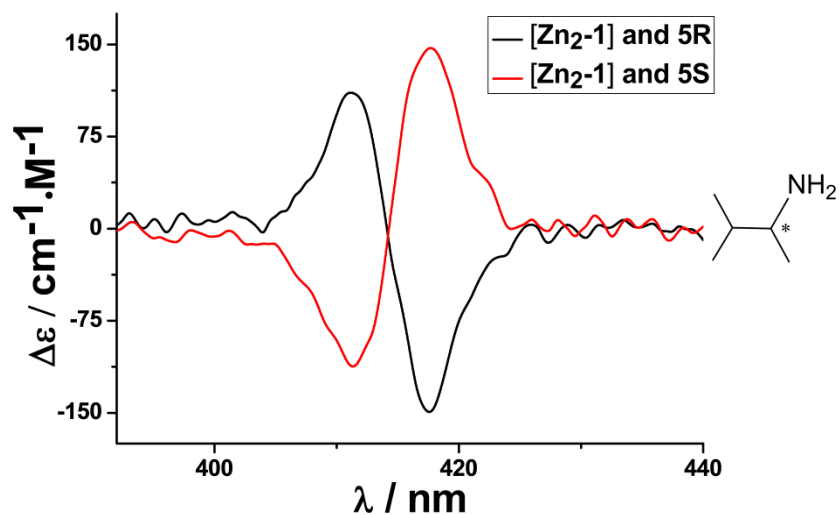

**Fig. S5.** Circular dichroism spectra of a solution of [Zn<sub>2</sub>-1] ( $1.63 \times 10^{-6}$  M) and 1500 equivalents of **5R** (black) and **5S** (red) in CH<sub>2</sub>Cl<sub>2</sub> at 295 K

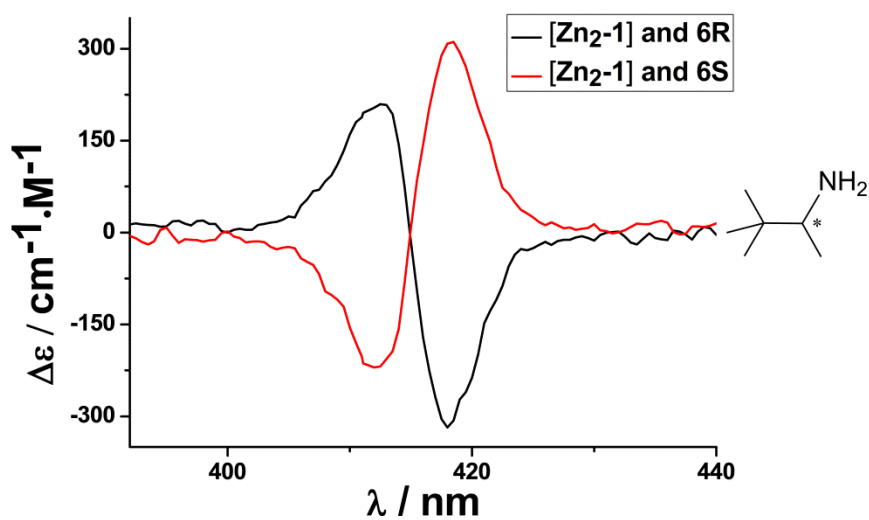

**Fig. S6.** Circular dichroism spectra of a solution of [Zn<sub>2</sub>-1] ( $1.63 \times 10^{-6}$  M) and 1500 equivalents of **6R** (black) and **6S** (red) in CH<sub>2</sub>Cl<sub>2</sub> at 295 K

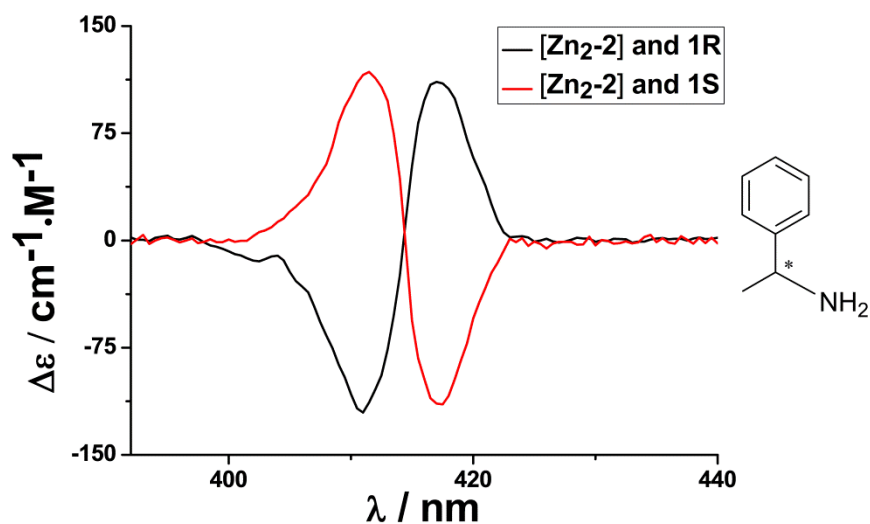

**Fig. S7.** Circular dichroism spectra of a solution of [Zn<sub>2</sub>-2] ( $1.61 \times 10^{-6}$  M) and 1500 equivalents of **1R** (black) and **1S** (red) in CH<sub>2</sub>Cl<sub>2</sub> at 295 K.

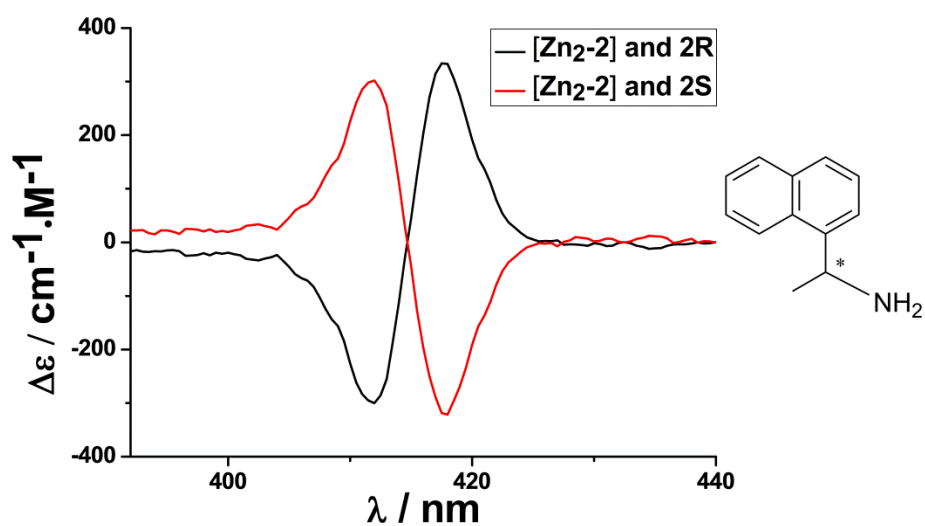

**Fig. S8.** Circular dichroism spectra of a solution of [Zn<sub>2</sub>-2] ( $1.61 \times 10^{-6}$  M) and 1500 equivalents of **2R** (black) and **2S** (red) in CH<sub>2</sub>Cl<sub>2</sub> at 295 K.

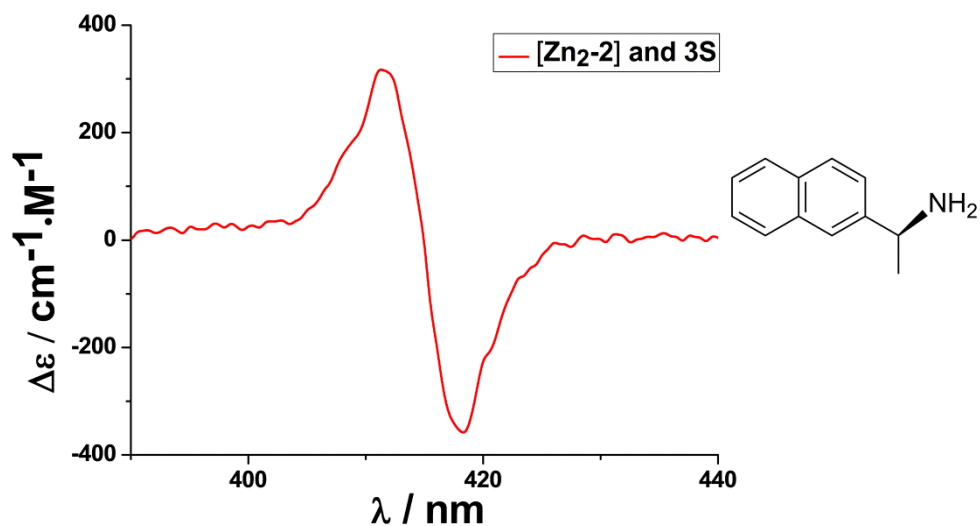

**Fig. S9.** Circular dichroism spectrum of a solution of  $[Zn_2-2]$  ( $1.61 \times 10^{-6}$  M) and 1500 equivalents of **3S** in  $CH_2Cl_2$  at 295 K.

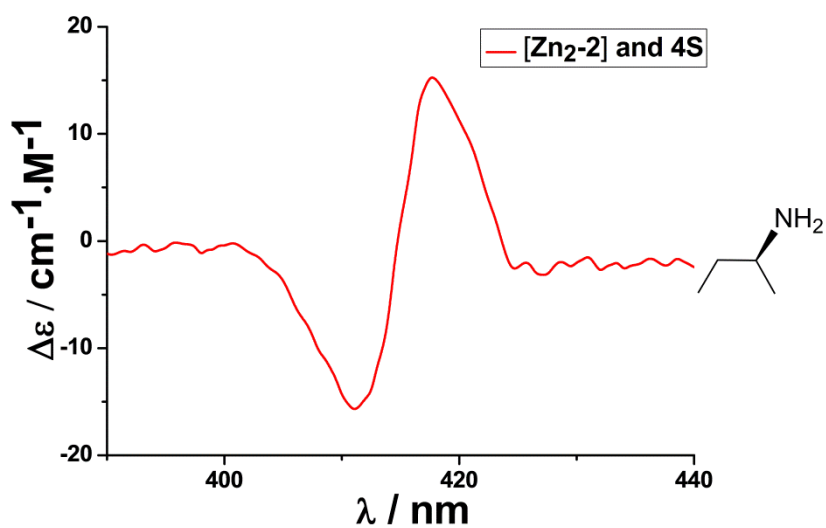

**Fig. S10.** Circular dichroism spectrum of a solution of  $[Zn_2-2]$  ( $1.61 \times 10^{-6}$  M) and 1500 equivalents of **4S** in  $CH_2Cl_2$  at 295 K.

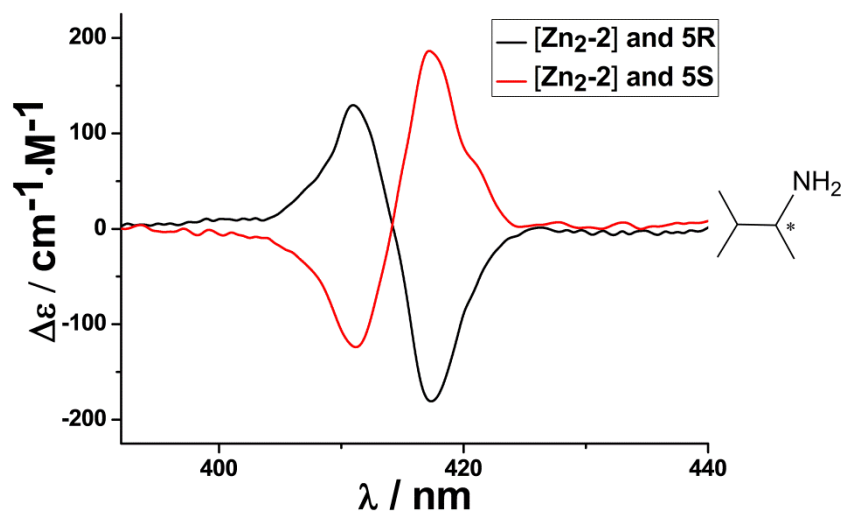

**Fig. S11.** Circular dichroism spectra of a solution of [Zn<sub>2</sub>-2] ( $1.61 \times 10^{-6}$  M) and 1500 equivalents of **5R** (black) and **5S** (red) in CH<sub>2</sub>Cl<sub>2</sub> at 295 K.

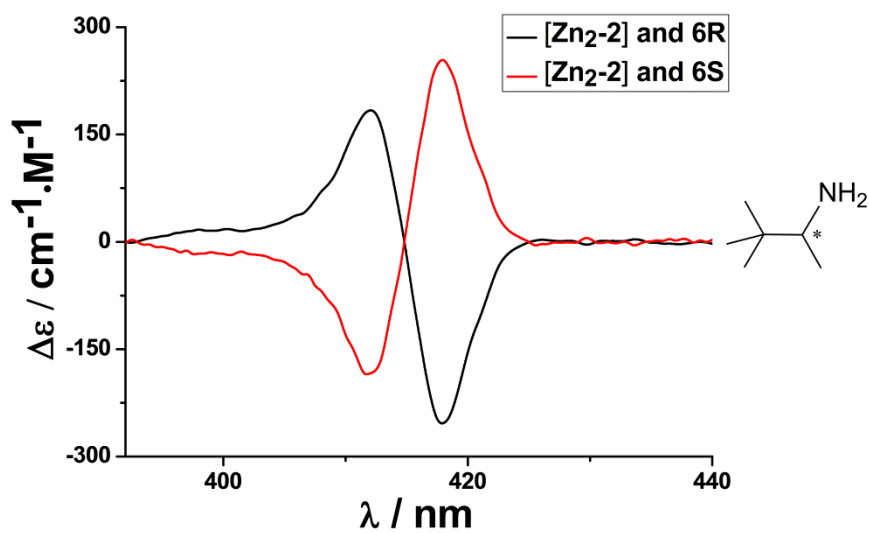

**Fig. S12.** Circular dichroism spectra of a solution of [Zn<sub>2</sub>-2] ( $1.61 \times 10^{-6}$  M) and 1500 equivalents of **6R** (black) and **6S** (red) in CH<sub>2</sub>Cl<sub>2</sub> at 295 K.

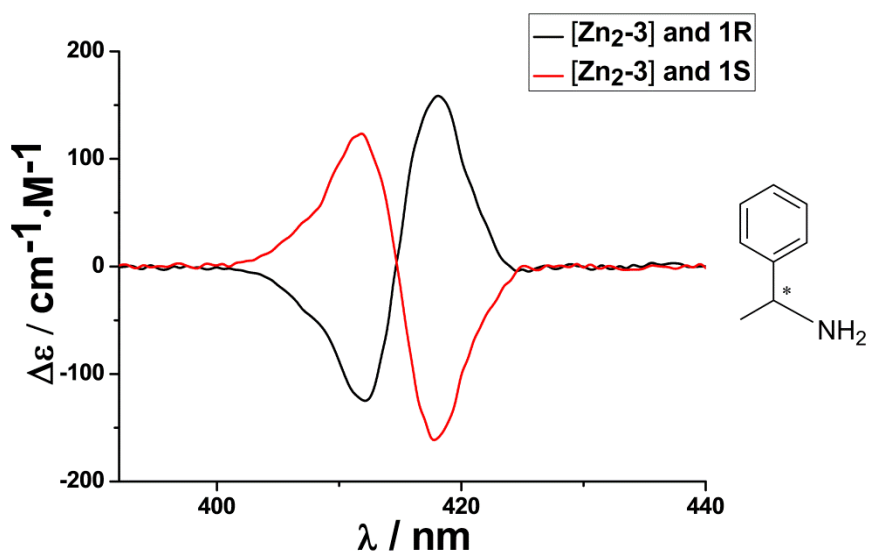

**Fig. S13.** Circular dichroism spectra of a solution of [Zn<sub>2</sub>-3] ( $1.57 \times 10^{-6}$  M) and 1500 equivalents of **1R** (black) and **1S** (red) in CH<sub>2</sub>Cl<sub>2</sub> at 295 K.

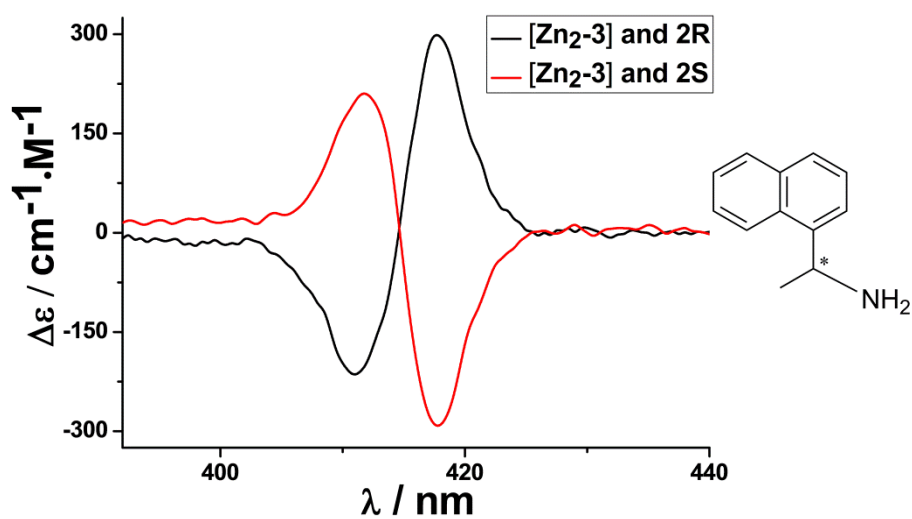

**Fig. S14.** Circular dichroism spectra of a solution of [Zn<sub>2</sub>-3] ( $1.57 \times 10^{-6}$  M) and 1500 equivalents of **2R** (black) and **2S** (red) in CH<sub>2</sub>Cl<sub>2</sub> at 295 K.

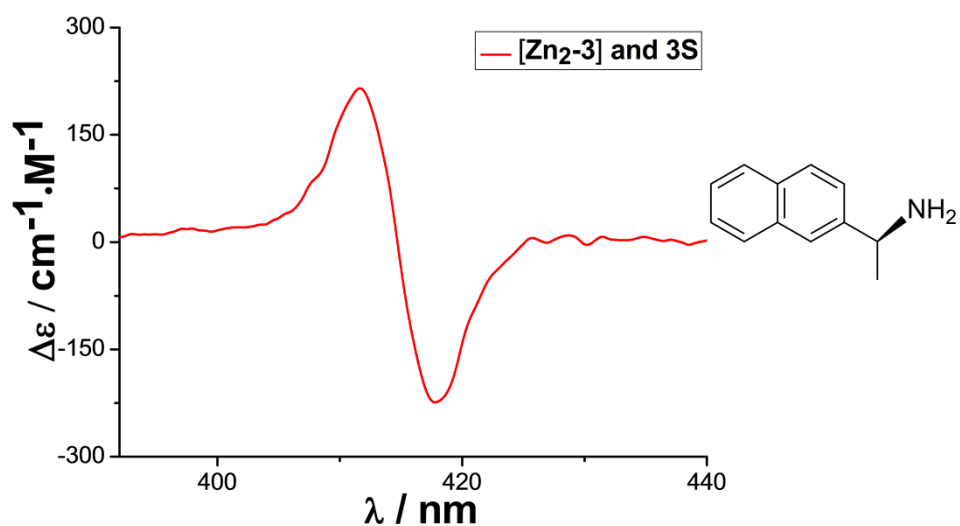

**Fig. S15.** Circular dichroism spectrum of a solution of  $[Zn_2-3]$  ( $1.57 \times 10^{-6}$  M) and 1500 equivalents of **3S** in  $CH_2Cl_2$  at 295 K.

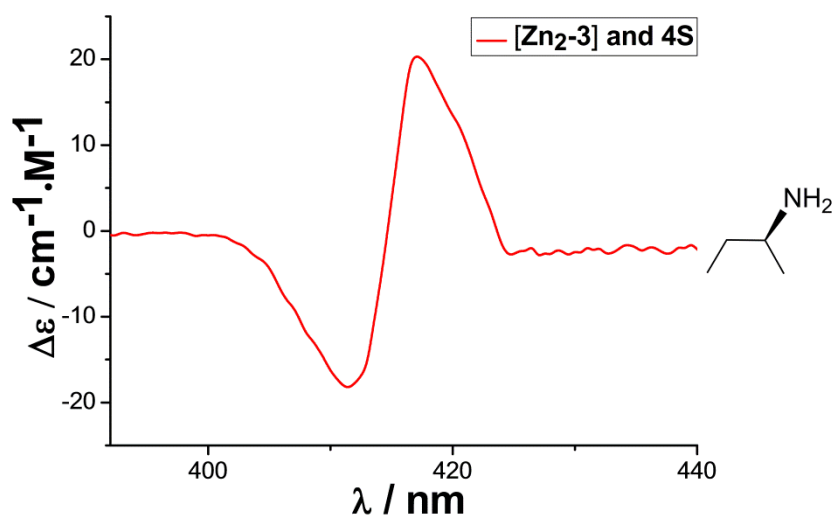

**Fig. S16.** Circular dichroism spectrum of a solution of  $[Zn_2-3]$  ( $1.57 \times 10^{-6}$  M) and 1500 equivalents of **4S** in  $CH_2Cl_2$  at 295 K.

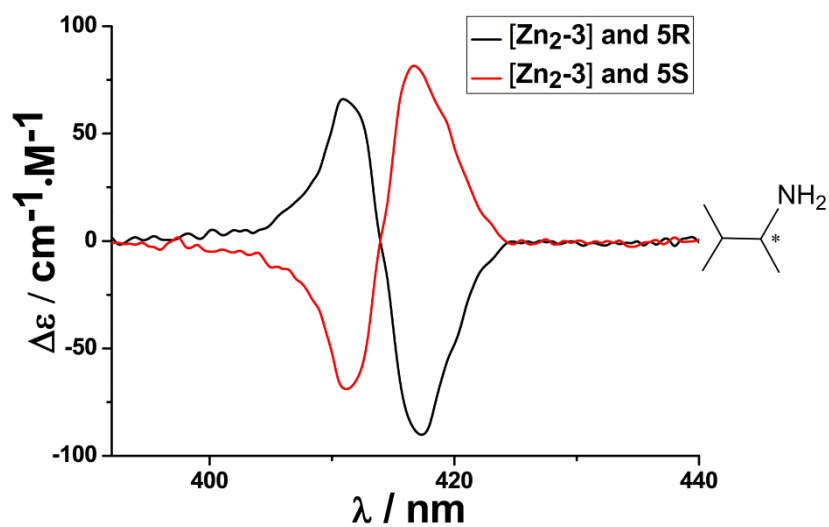

**Fig. S17.** Circular dichroism spectra of a solution of [Zn<sub>2</sub>-3] ( $1.57 \times 10^{-6}$  M) and 1500 equivalents of **5R** (black) and **5S** (red) in CH<sub>2</sub>Cl<sub>2</sub> at 295 K.

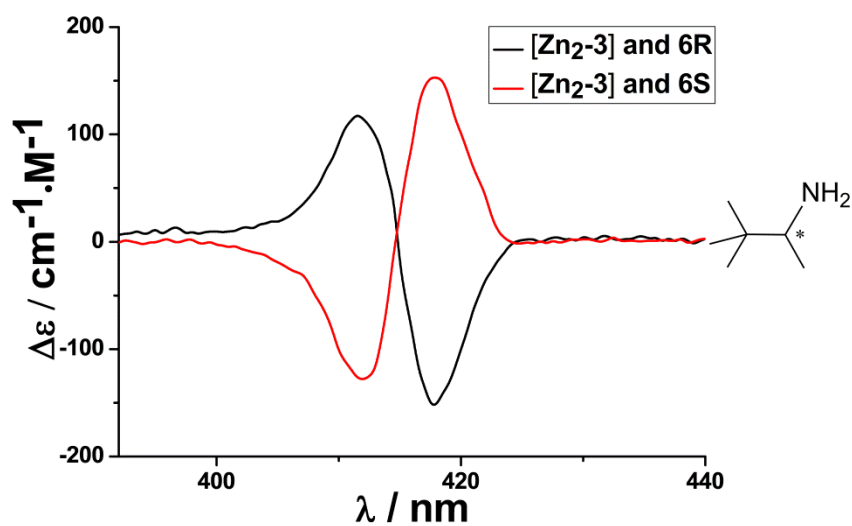

**Fig. S18.** Circular dichroism spectra of a solution of [Zn<sub>2</sub>-3] ( $1.57 \times 10^{-6}$  M) and 1500 equivalents of **6R** (black) and **6S** (red) in CH<sub>2</sub>Cl<sub>2</sub> at 295 K.



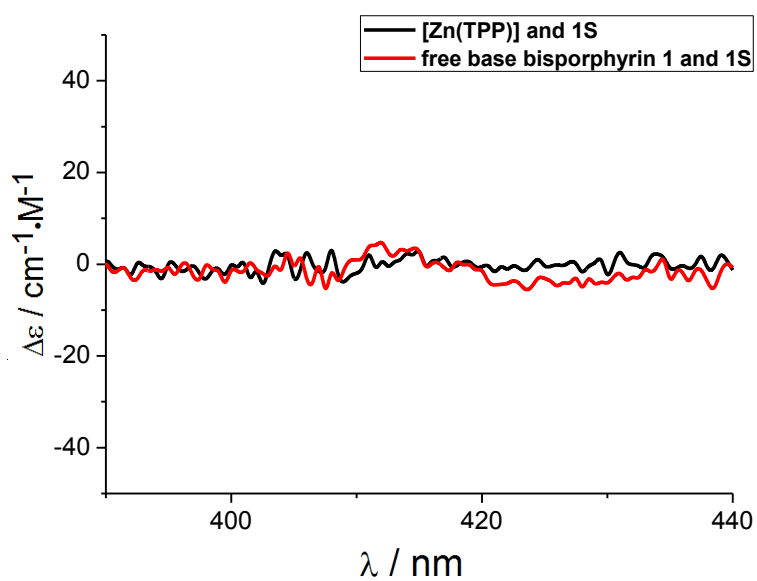

**Fig. S19.** Circular dichroism spectrum of a solution of [Zn(TPP)] ( $1.42 \times 10^{-6}$  M) and 1500 equivalents of **1S** in  $\text{CH}_2\text{Cl}_2$  at 295 K.(black). Circular dichroism spectrum of a solution of free base bisporphyrin **1**( $1.35 \times 10^{-6}$  M) and 1500 equivalents of **1S** in  $\text{CH}_2\text{Cl}_2$  at 295 K.(red).

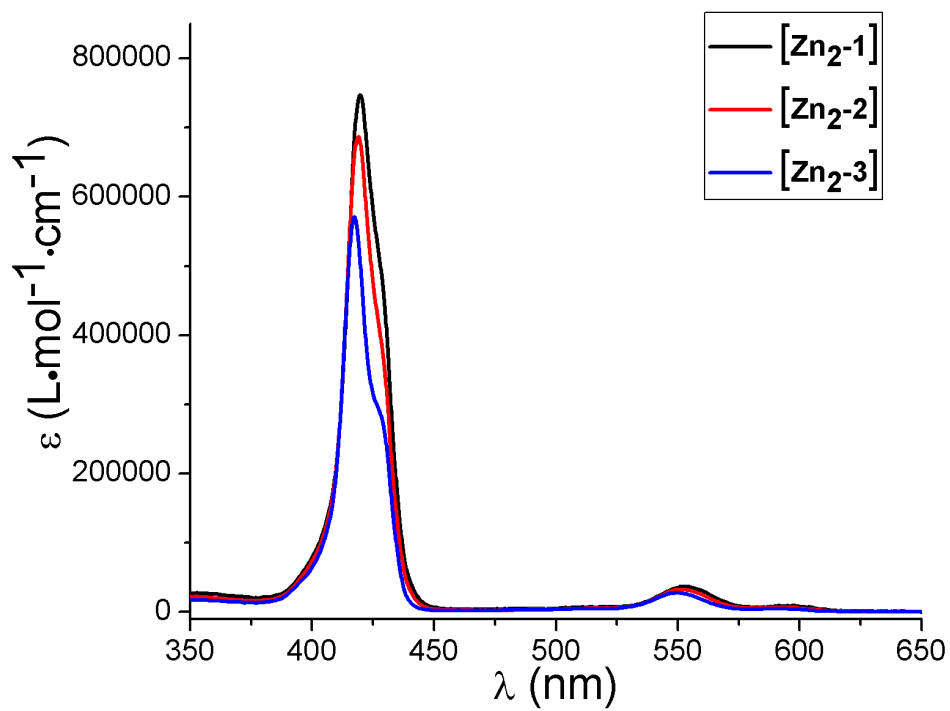

**Fig. S20.** The UV-vis spectra of [Zn<sub>2</sub>-1] ( $1.63 \times 10^{-6}$  M), [Zn<sub>2</sub>-2] ( $1.61 \times 10^{-6}$  M), [Zn<sub>2</sub>-3] ( $1.57 \times 10^{-6}$  M) in methylene dichloride.

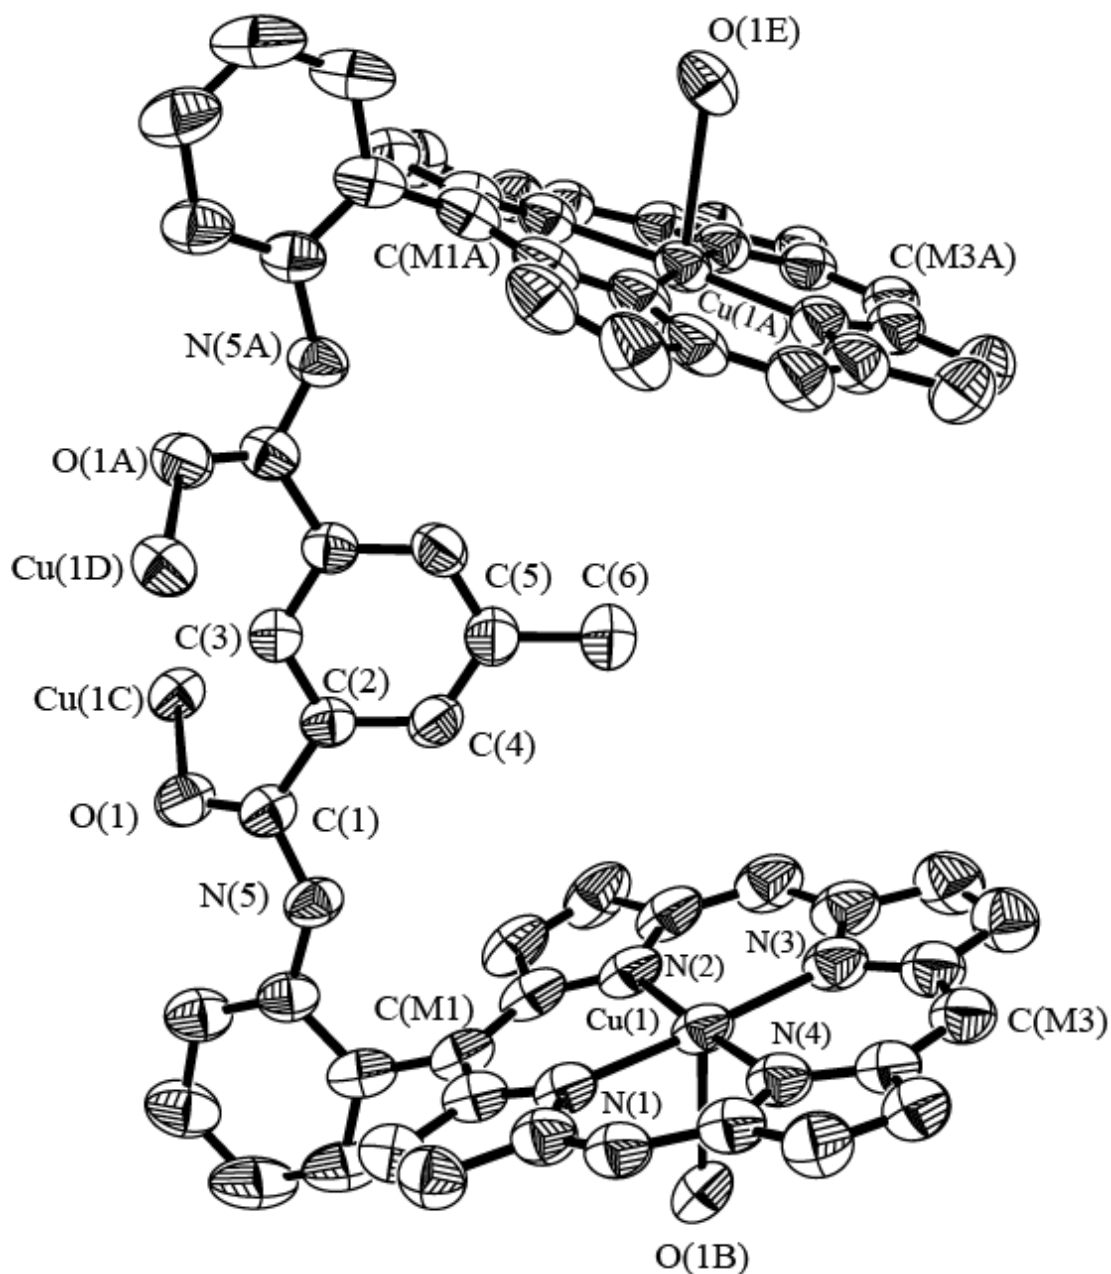

**Fig. S21.** ORTEP diagram of  $[\text{Cu}_2\text{-2}]$ . 50% probability ellipsoids are depicted.  $\text{Cu}(1)\text{-O}(1\text{B})=2.653(3)$  Å,  $\text{Cu}(1)\text{-N}(1)=1.995(2)$  Å,  $\text{Cu}(1)\text{-N}(2)=2.006(3)$  Å,  $\text{Cu}(1)\text{-N}(3)=2.014(3)$  Å,  $\text{Cu}(1)\text{-N}(4)=2.012(3)$  Å. (symmetry code A:  $1-X, -Y, Z$ , B:  $1/2+Y, 1-X, -1/4+Z$ , C:  $1-Y, -1/2+X, 1/4+z$ , D:  $Y, 1/2-X, 1/4+Z$ , E:  $1/2-Y, -1+X, -1/4+Z$ ). Some phenyl groups at *meso*-positions and all hydrogen atoms are omitted for clarity.

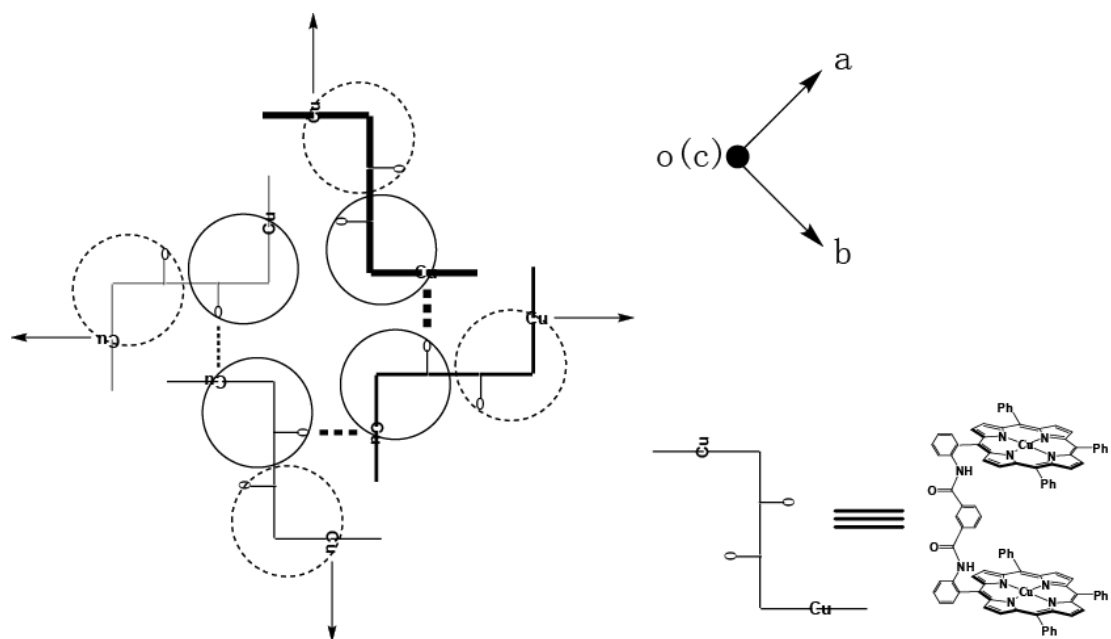

**Fig. S22.** Illustration of the packing structure of  $[\text{Cu}_2\text{-2}]$  in the solid state with cell axes labeled. The unit in thicker lines is facing the reader, and the unit in narrower lines is away from the reader.

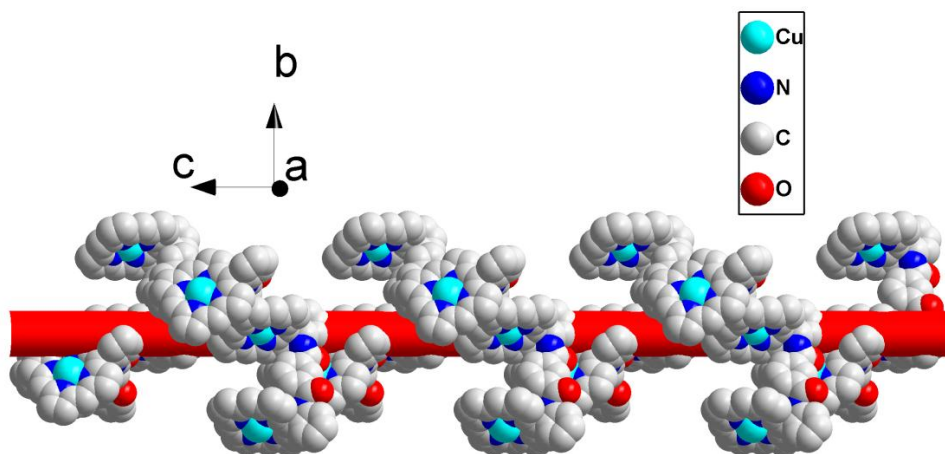

**Fig. S23.** The space-filling representation of the helical chain with  $P$  configuration of  $[\text{Cu}_2\text{-2}]$  formed by  $\text{Cu-O}$  coordination bonds along  $c$  axis.

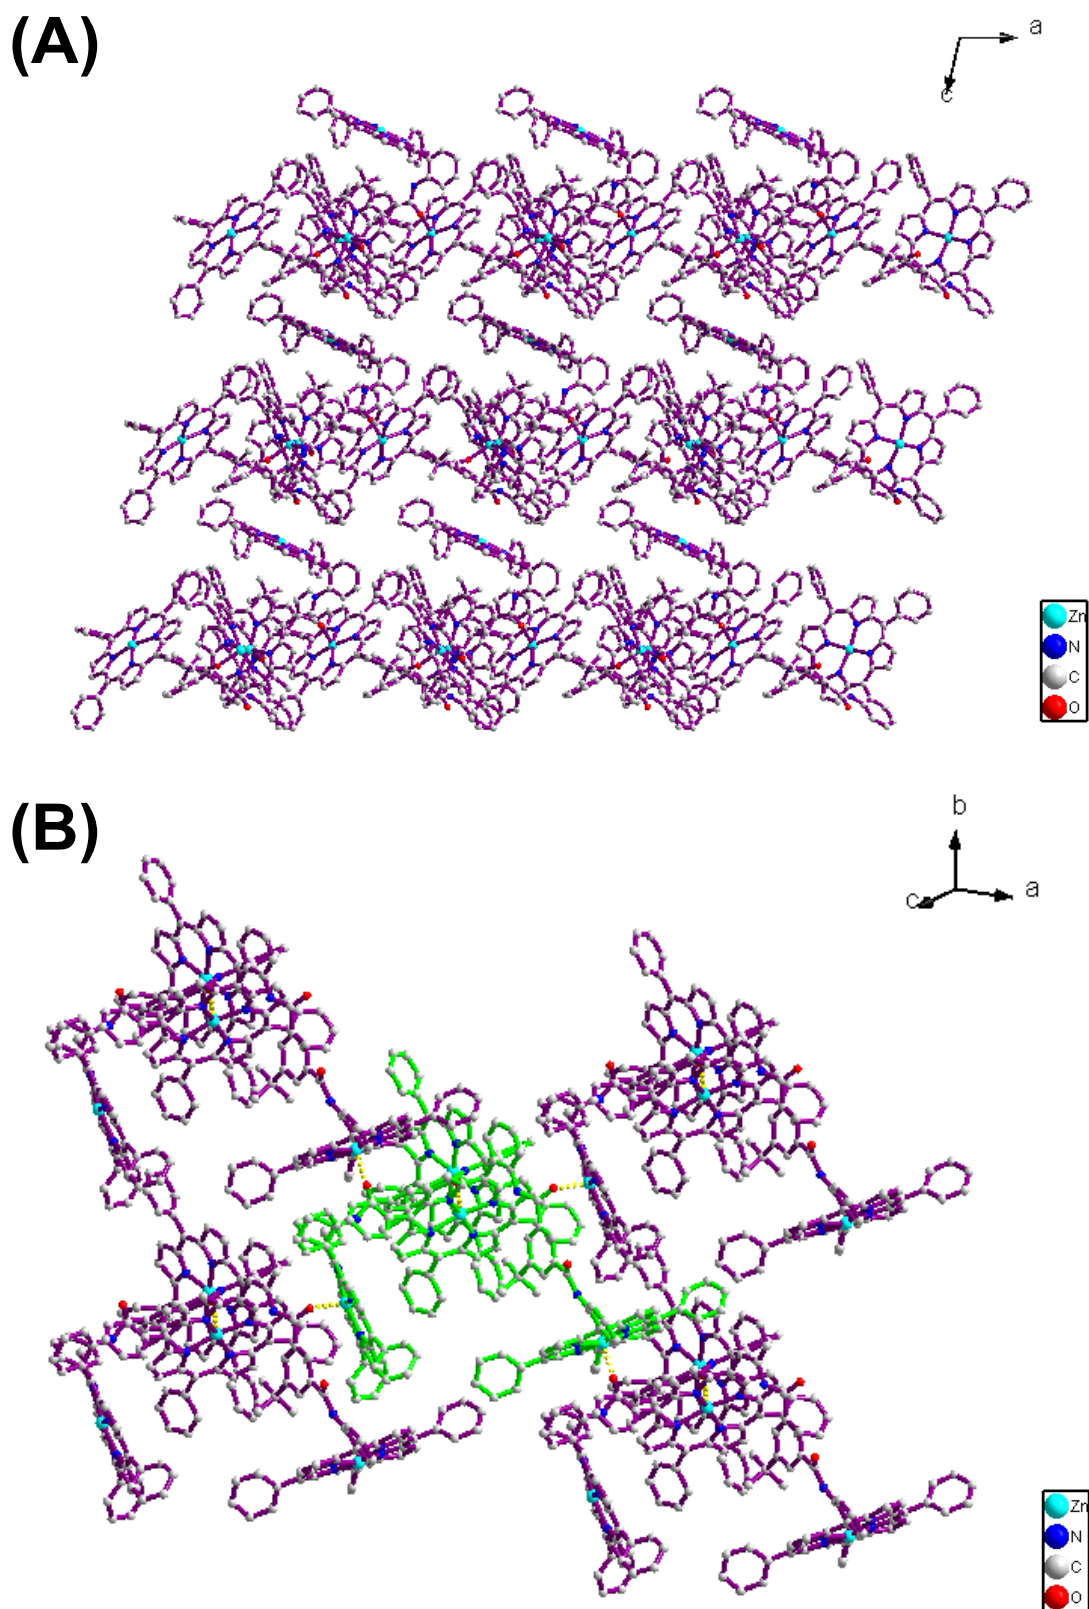

**Fig. S24.** Diagram illustrating the packing of [Zn<sub>2</sub>-3] in the unit cell (H-atoms and the uncoordinated solvent molecules present in crystal lattice have been omitted for clarity). (A) view along *b* axis, (B) view along another orientation showing the two dimensional binding network.

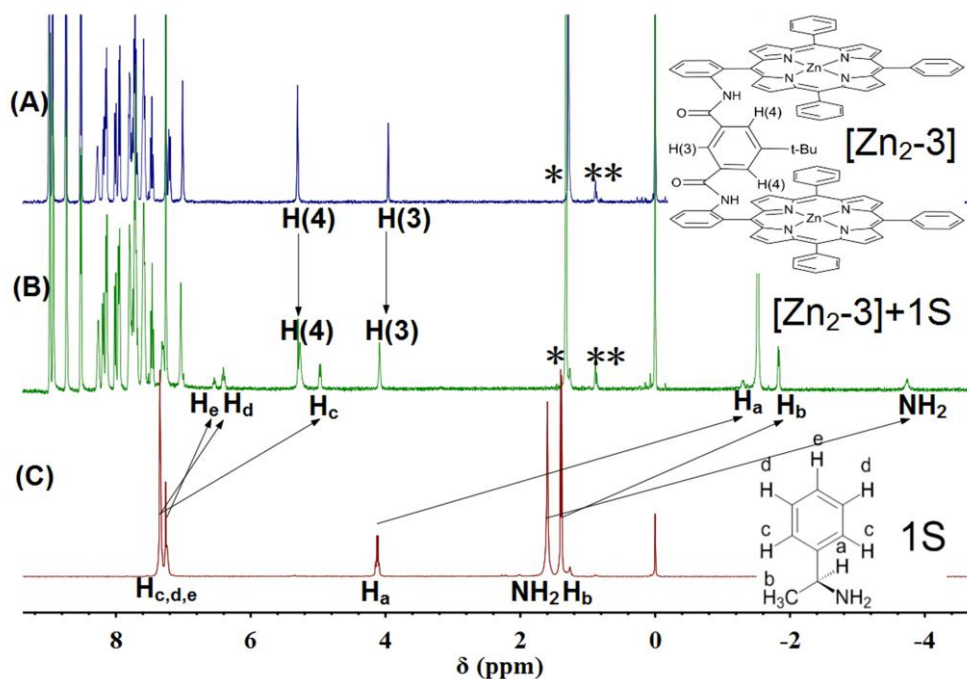

**Fig. S25.** <sup>1</sup>H NMR spectra in CDCl<sub>3</sub> (at 295 K) of (A) [Zn<sub>2</sub>-3] (6.36 × 10<sup>-3</sup> M), (B) the mixture of [Zn<sub>2</sub>-3] (6.36 × 10<sup>-3</sup> M) and 1S (0.5 eq.), (C) 1S. Inset shows the proton numbering scheme of [Zn<sub>2</sub>-3] and 1S. \*: Impurity from water; \*\*: Impurity from petroleum ether.

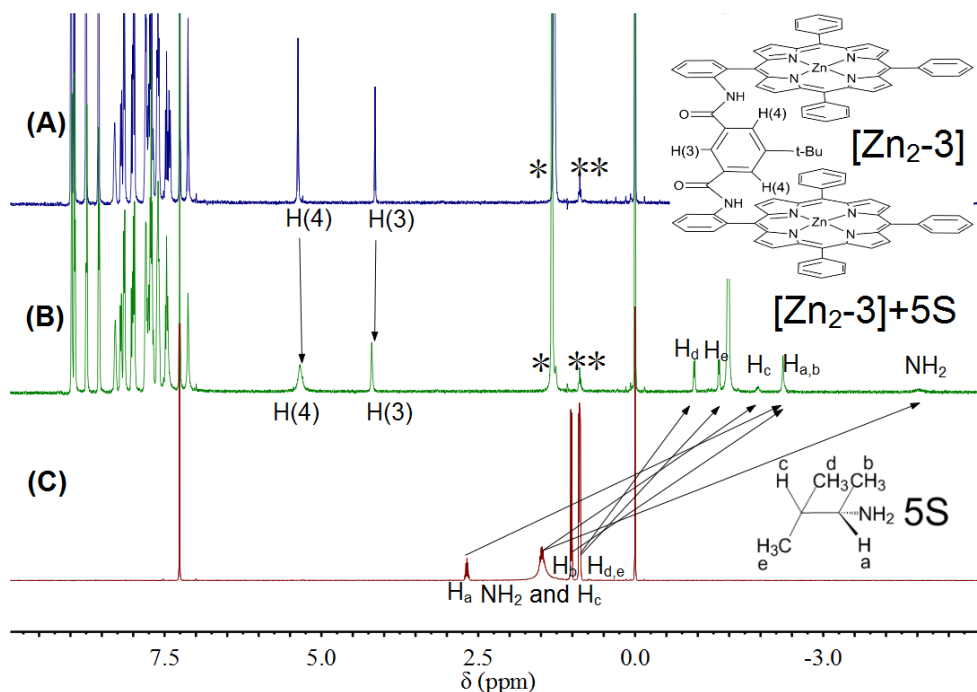

**Fig. S26.** <sup>1</sup>H NMR spectra in CDCl<sub>3</sub> (at 295 K) of (A) [Zn<sub>2</sub>-3] (6.36 × 10<sup>-3</sup> M), (B) the mixture of [Zn<sub>2</sub>-3] (6.36 × 10<sup>-3</sup> M) and 5S (0.5 eq.), (C) 5S. Inset shows the proton numbering scheme of [Zn<sub>2</sub>-3] and 5S. \*: Impurity from water; \*\*: impurity from petroleum ether.

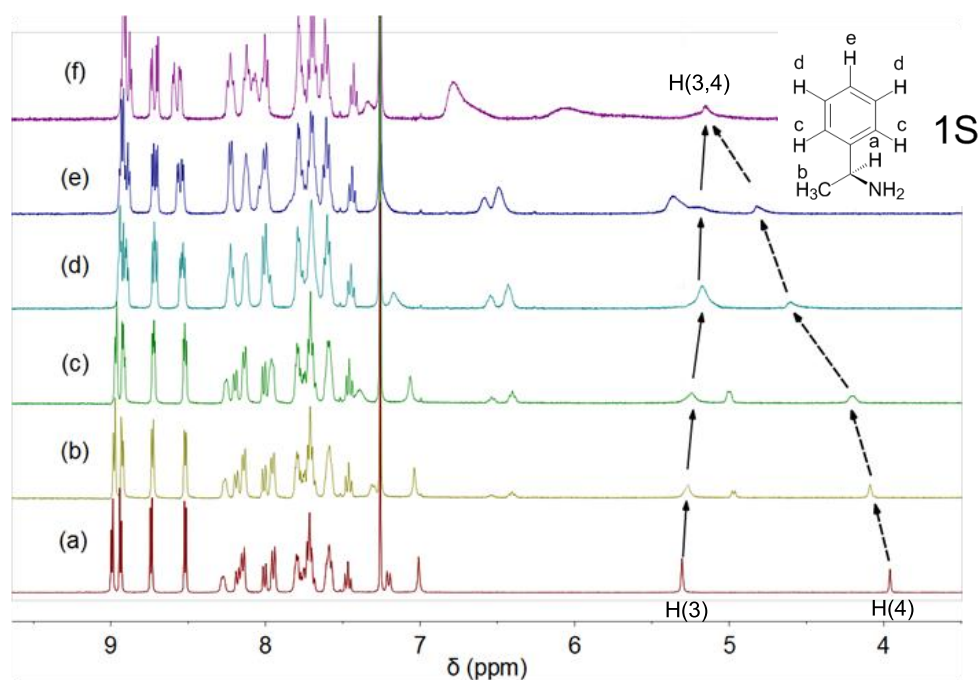

**Fig. S27.**  $^1\text{H}$  NMR spectral changes of  $[\text{Zn}_2\text{-3}]$  ( $6.36 \times 10^{-3}$  M) upon addition of **1S** in  $\text{CDCl}_3$  at 295 K as the host-guest molar ratio: (a) 1:0, (b) 1:0.26, (c) 1:0.52, (d) 1:0.78, (e) 1:1.12, (f) 1:1.53. Inset shows the proton numbering scheme of **1S**.

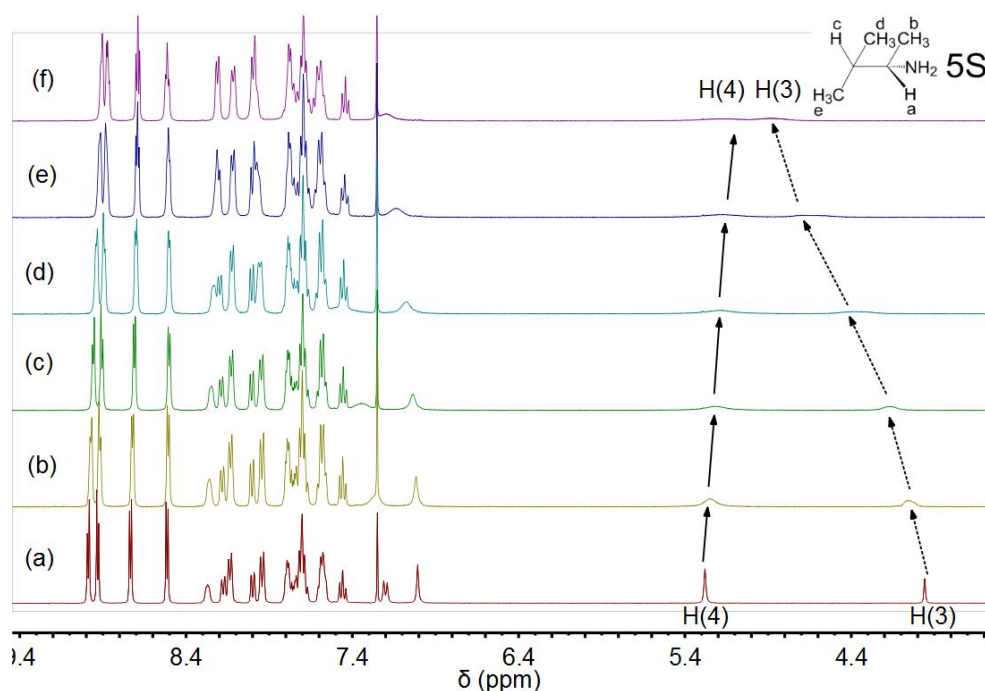

**Fig. S28.**  $^1\text{H}$  NMR spectral changes of  $[\text{Zn}_2\text{-3}]$  ( $6.36 \times 10^{-3}$  M) upon addition of **5S** in  $\text{CDCl}_3$  at 295 K as the host-guest molar ratio: (a) 1:0, (b) 1:0.26, (c) 1:0.52, (d) 1:0.78, (e) 1:1.12, (f) 1:1.53. Inset shows the proton numbering scheme of **5S**.

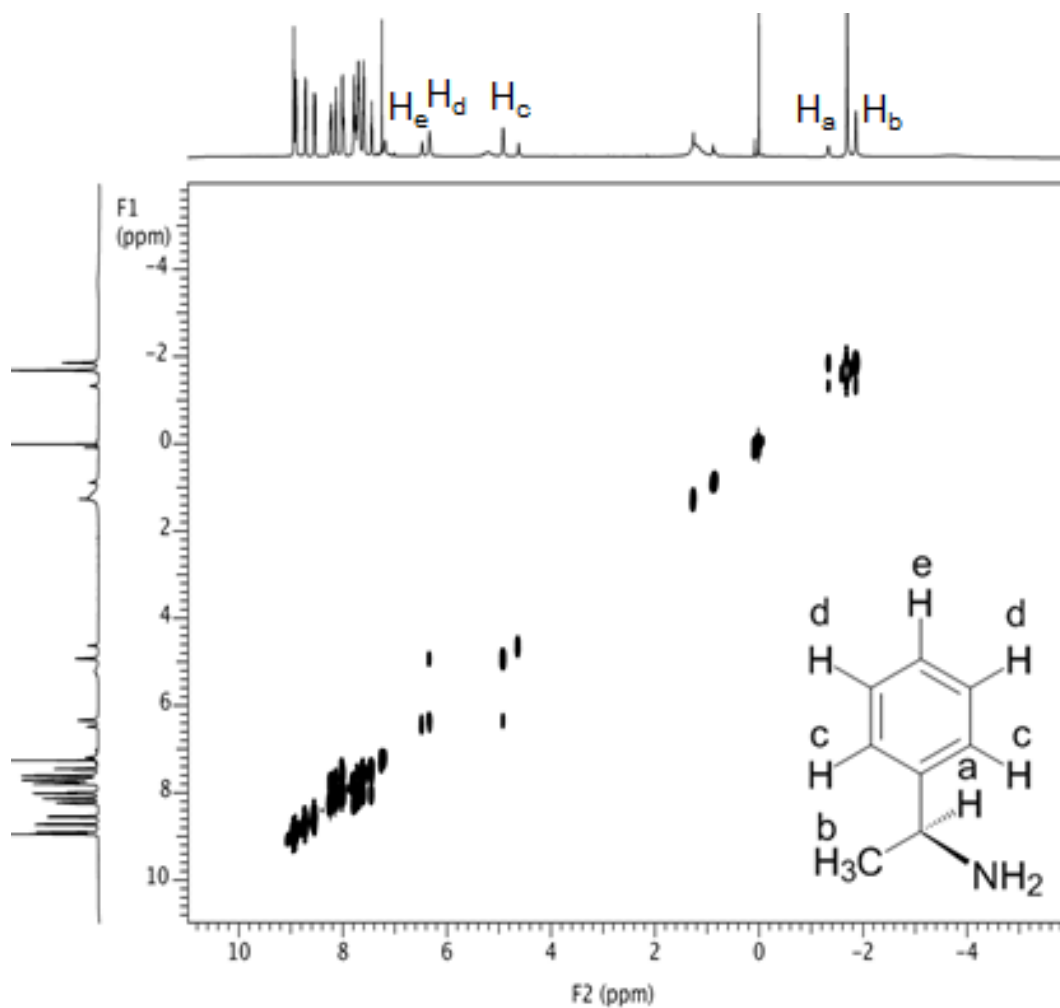

**Fig. S29.**  $^1\text{H}$ - $^1\text{H}$  gCOSY spectrum of the mixture of  $[\text{Zn}_2\text{-3}]$  ( $6.36 \times 10^{-3}$  M) and **1S** (0.5 equiv) in  $\text{CDCl}_3$  at 295K. Inset shows the proton numbering scheme of **1S**.



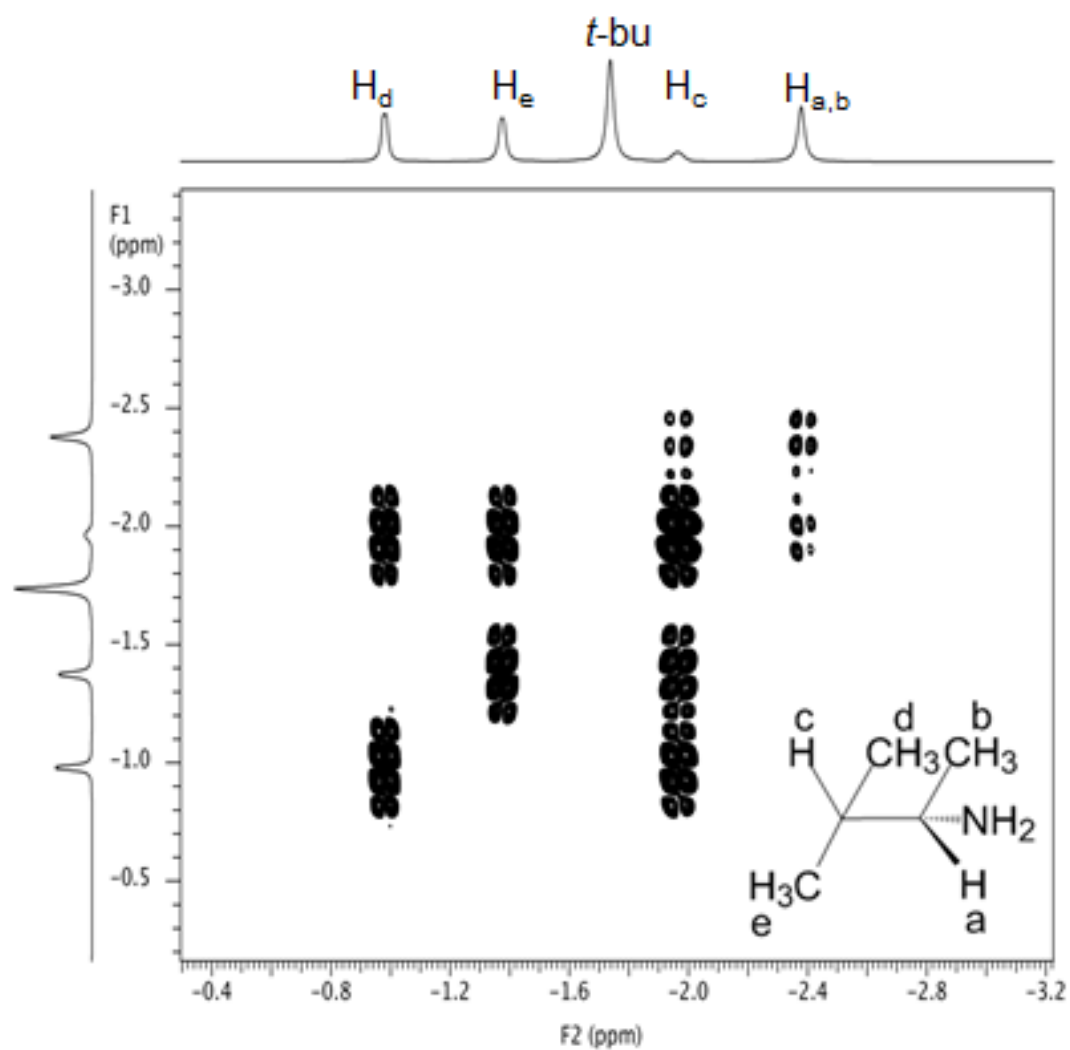

**Fig. S30.**  $^1\text{H}$ - $^1\text{H}$  GDQCOSY spectrum of the mixture of  $[\text{Zn}_2\text{-3}]$  ( $6.36 \times 10^{-3}$  M) and **5S** (0.5 equiv) in  $\text{CDCl}_3$  at 295K (selected proton only). Inset shows the proton numbering scheme of **5S**.

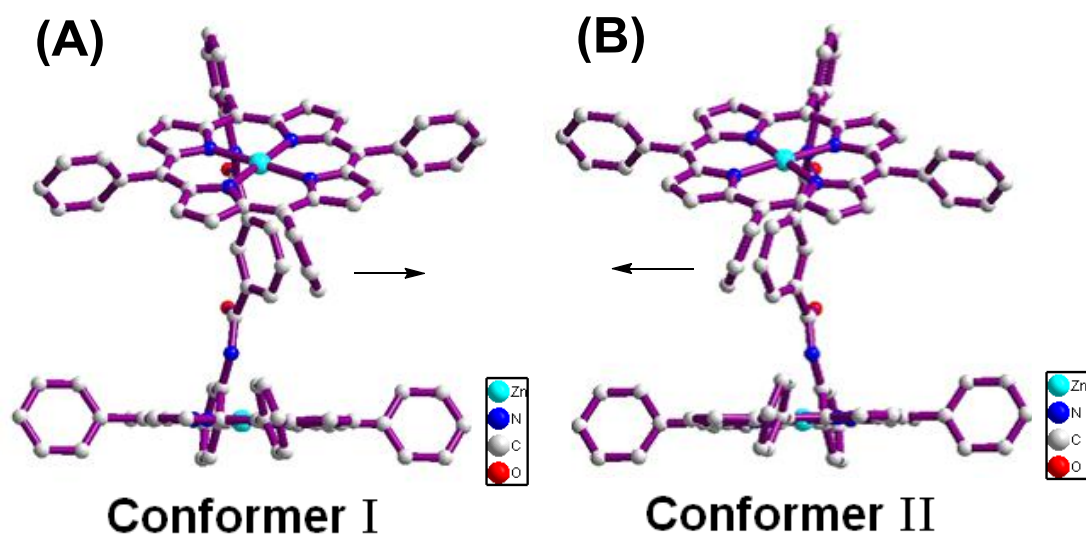

**Fig. S31.** DFT B3LYP/6-31G\* optimized structure of [Zn<sub>2</sub>-1]. It exists as a pair of enantiomers, named **Conformer I** and **Conformer II**. For clarity, the outside binding ligand, some phenyl rings at *meso*-positions and all hydrogen atoms are omitted.

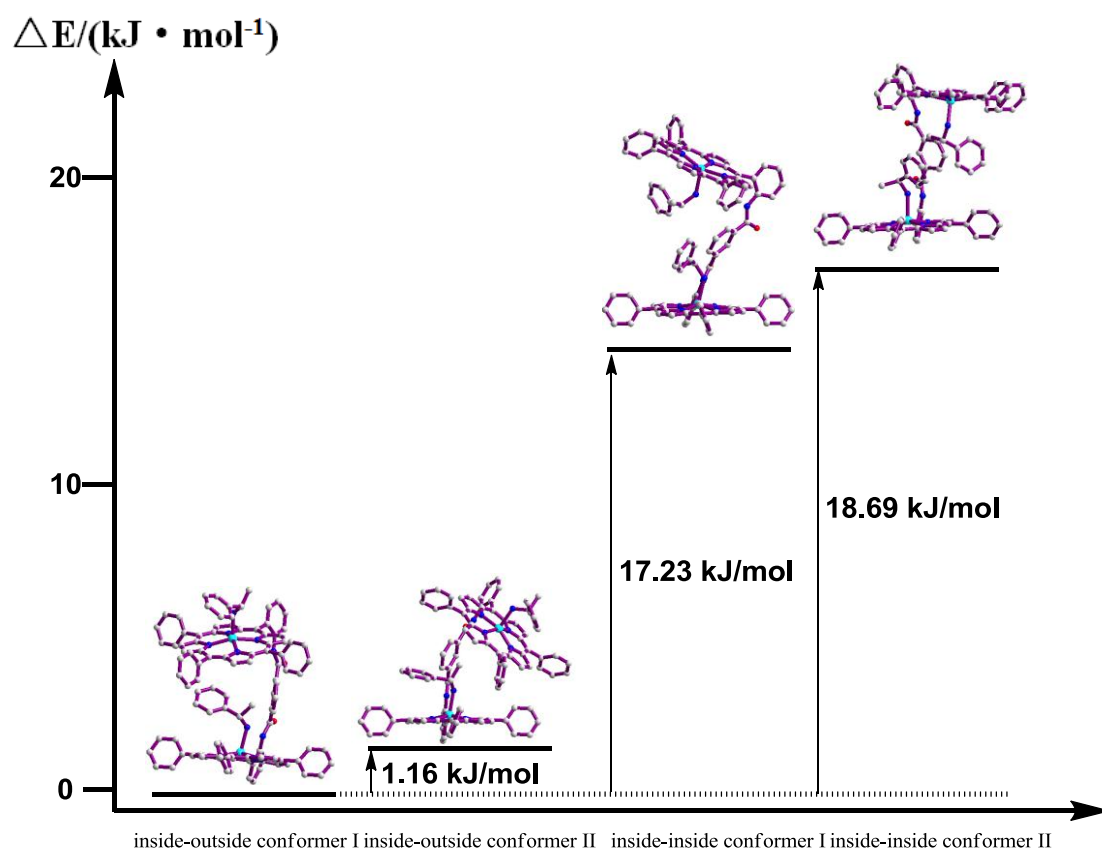

**Fig. S32.** Relative energies of DFT-optimized “inside-inside” and “inside-outside” conformers of  $[Zn_2-1] \cdot 1S$ .

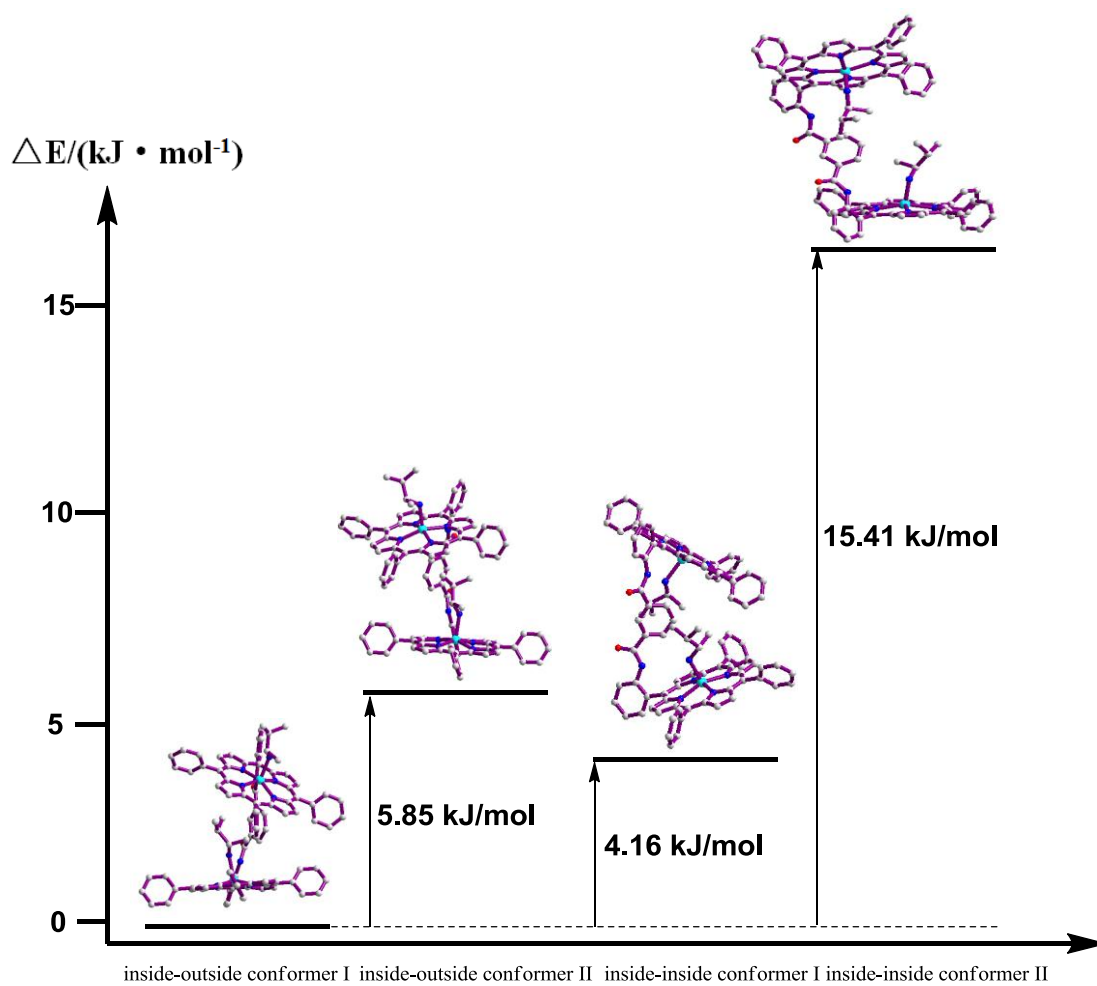

**Fig. S33.** Relative energies of DFT-optimized “inside-inside” and “inside-outside” conformers of  $[Zn_2-1] \cdot 5S$ .

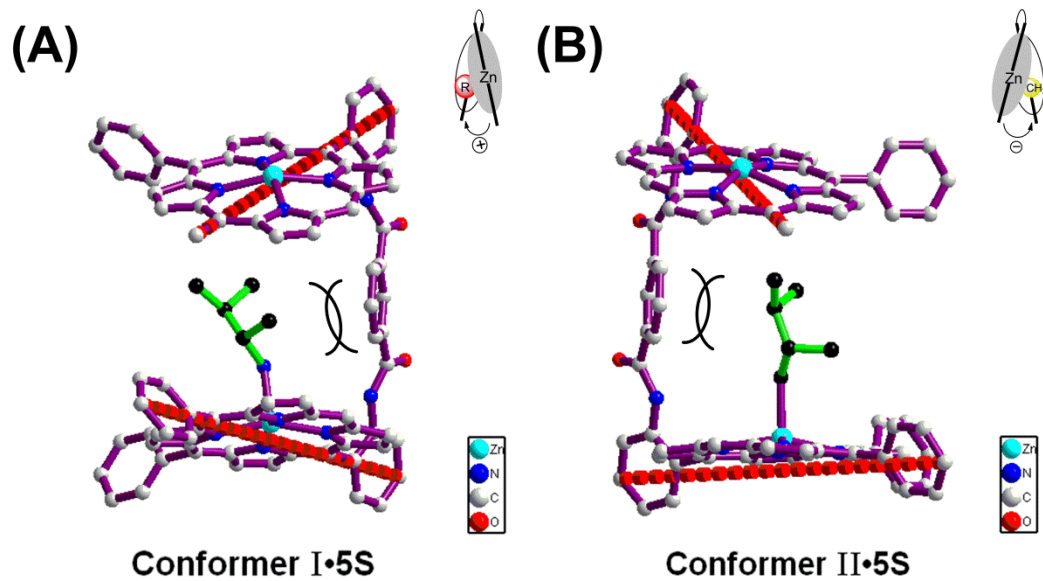

**Fig. S34.** DFT B3LYP/6-31G\* optimized structures of the corresponding complex formed between [Zn<sub>2</sub>-1] and **5S**: (A) **Conformer I·5S** and (B) **conformer II·5S**. For clarity, the outside binding ligand, some phenyl rings at *meso*-positions and most hydrogen atoms are omitted.

**Table S1.** Crystal data and structural refinements of [Cu<sub>2</sub>-2] and [Zn<sub>2</sub>-3]

| Crystal                                      | [Cu <sub>2</sub> -2]                                                           | [Zn <sub>2</sub> -3]                                                             |
|----------------------------------------------|--------------------------------------------------------------------------------|----------------------------------------------------------------------------------|
| Chemical formula                             | C <sub>97</sub> H <sub>62</sub> Cu <sub>2</sub> N <sub>10</sub> O <sub>2</sub> | C <sub>200</sub> H <sub>136</sub> N <sub>20</sub> O <sub>4</sub> Zn <sub>4</sub> |
| Formula weight                               | 1526.65                                                                        | 3144.77                                                                          |
| Wavelength (Å)                               | 1.54178                                                                        | 0.71073                                                                          |
| Temperature                                  | 220(2) K                                                                       | 220(2) K                                                                         |
| Crystal system                               | Tetragonal                                                                     | Monoclinic                                                                       |
| Space group                                  | <i>I</i> 4 <sub>1</sub>                                                        | C <sub>c</sub>                                                                   |
| a (Å)                                        | 17.8413(2)                                                                     | 31.160(3)                                                                        |
| b (Å)                                        | 17.8413(2)                                                                     | 19.409(2)                                                                        |
| c (Å)                                        | 27.0941(5)                                                                     | 32.877(4)                                                                        |
| α (deg)                                      | 90                                                                             | 90                                                                               |
| β (deg)                                      | 90                                                                             | 103.566(2)                                                                       |
| γ (deg)                                      | 90                                                                             | 90                                                                               |
| V (Å <sup>3</sup> )                          | 8624.4(2)                                                                      | 19329(4)                                                                         |
| Z                                            | 4                                                                              | 4                                                                                |
| Density (Mg/m <sup>3</sup> )                 | 1.176                                                                          | 1.081                                                                            |
| Absorption coefficient (mm <sup>-1</sup> )   | 1.022                                                                          | 0.545                                                                            |
| F(000)                                       | 3152                                                                           | 6512                                                                             |
| Data collection θ range                      | 2.97-73.44°                                                                    | 2.06-25.00°                                                                      |
| Index ranges                                 | -19<=h<=21, -21<=k<=21,<br>-33<=l<=33                                          | -37<=h<=37, -23<=k<=23,<br>-38<=l<=38                                            |
| Reflections collected                        | 20873                                                                          | 127275                                                                           |
| R <sub>int</sub>                             | 0.0447                                                                         | 0.0785                                                                           |
| Independent reflections                      | 8083                                                                           | 32530                                                                            |
| Data / restraints / parameters               | 8083 / 109 / 527                                                               | 32530 / 260 / 2024                                                               |
| GOF on F <sup>2</sup>                        | 1.034                                                                          | 1.049                                                                            |
| R1 <sup>a</sup> [ <i>I</i> > 2σ( <i>I</i> )] | 0.0479                                                                         | 0.0940                                                                           |
| wR2                                          | 0.1279                                                                         | 0.2260                                                                           |
| Residual peak/hole (e/Å <sup>-3</sup> )      | 0.339/-0.191                                                                   | 1.546/-0.989                                                                     |
| Flack parameter                              | -0.01(2)                                                                       | 0.179(12)                                                                        |

$$^a R_1 = (F_0 - F_c) / F_0, wR2 = w(F_0^2 - F_c^2) / w(F_0^2)^{1/2}$$

**Table S2.** Selected bond distances for [Zn<sub>2</sub>-3]

---

|               |            |              |            |               |            |
|---------------|------------|--------------|------------|---------------|------------|
| Zn(1)-N(11)   | 2.019(7) Å | Zn(2)-N(23)  | 2.027(7) Å | Zn(4)-N(41)   | 2.099(7) Å |
| Zn(1)-N(12)   | 2.080(6) Å | Zn(2)-N(24)  | 2.011(7) Å | Zn(4)-N(42)   | 2.034(6) Å |
| Zn(1)-N(13)   | 2.060(7) Å | Zn(3)-N(31)  | 2.064(7) Å | Zn(4)-N(43)   | 2.053(7) Å |
| Zn(1)-N(14)   | 2.052(7) Å | Zn(3)-N(32)  | 2.048(7) Å | Zn(4)-N(44)   | 2.048(7) Å |
| Zn(1)-O(601A) | 2.143(6) Å | Zn(3)-N(33)  | 2.048(7) Å | Zn(4)-O(501B) | 2.183(6) Å |
| Zn(2)-N(21)   | 2.050(6) Å | Zn(3)-N(34)  | 2.054(7) Å |               |            |
| Zn(2)-N(22)   | 2.045(7) Å | Zn(3)-O(502) | 2.166(5) Å |               |            |

---

symmetry code A: -1+X, -1-Y, 1/2+Z, B: X, -1-Y, 1/2+Z, C: -1+X, -Y, 1/2+Z, D:  
1/2+X, 1/2+Y, Z

---

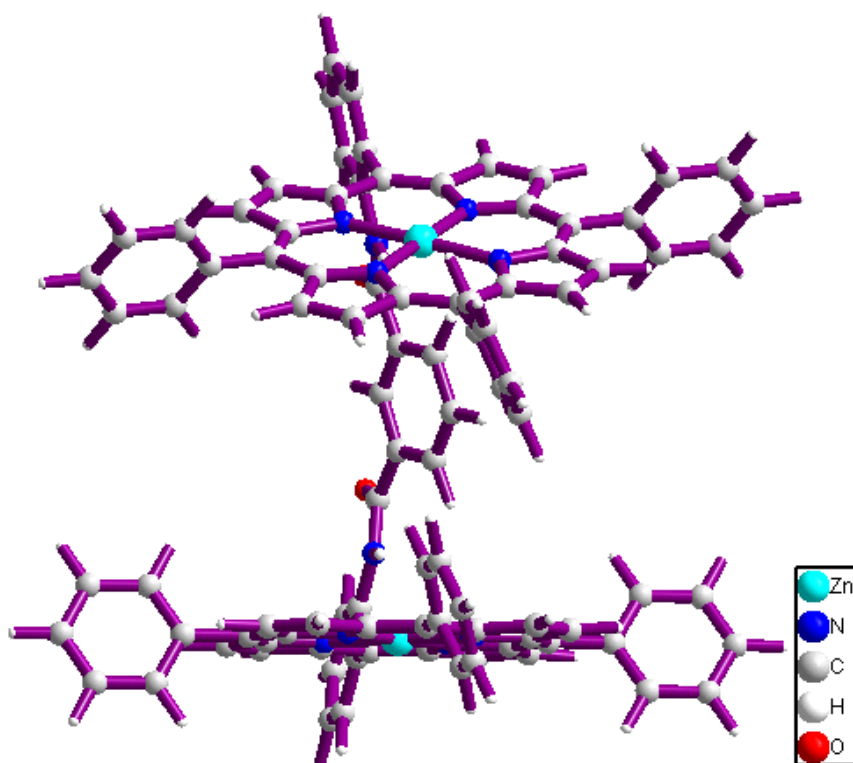

## Conformer I

$$\Delta H^\circ = -7950.83352331 \text{ hartree}$$

Cartesian coordinates for Geometry Optimized **Conformer I**

| Atoms | x           | y           | z           |
|-------|-------------|-------------|-------------|
| Zn    | -4.61128500 | 0.56466200  | 0.27358400  |
| N     | -4.65958600 | -0.60408800 | 1.94759900  |
| N     | -5.12684200 | -1.04929900 | -0.86902700 |
| N     | -4.51958000 | 1.71944900  | -1.40778400 |
| N     | -4.07716400 | 2.17214500  | 1.41233400  |
| C     | -4.40188000 | -0.20464800 | 3.24079200  |
| C     | -5.00692500 | -1.93493900 | 2.01300000  |
| C     | -5.42483100 | -2.31505800 | -0.41495400 |
| C     | -5.33985600 | -1.06337200 | -2.23068700 |
| C     | -4.79815600 | 1.32375100  | -2.69700200 |
| C     | -4.18369400 | 3.05381200  | -1.47186400 |
| C     | -3.77221600 | 3.43610800  | 0.95759000  |
| C     | -3.85708300 | 2.18140600  | 2.77137400  |
| C     | -4.59846200 | -1.31758400 | 4.14285400  |
| H     | -4.47827100 | -1.27837100 | 5.21556900  |
| C     | -4.96405100 | -2.38630600 | 3.38512100  |



|   |             |             |             |
|---|-------------|-------------|-------------|
| H | -5.19584600 | -3.38805800 | 3.71718000  |
| C | -5.83282600 | -3.14961100 | -1.52193700 |
| H | -6.13163100 | -4.18515800 | -1.44261100 |
| C | -5.78406800 | -2.37667500 | -2.64074000 |
| H | -6.03697100 | -2.66110100 | -3.65167300 |
| C | -4.62583400 | 2.43996200  | -3.59742300 |
| H | -4.76914500 | 2.40549000  | -4.66745600 |
| C | -4.25695600 | 3.50909500  | -2.84094700 |
| H | -4.05210500 | 4.51542700  | -3.17561400 |
| C | -3.33953400 | 4.25975400  | 2.06286300  |
| H | -3.02184400 | 5.28930300  | 1.98624400  |
| C | -3.39204200 | 3.48632500  | 3.18104400  |
| H | -3.12450900 | 3.76394500  | 4.19003600  |
| C | -5.36150100 | -2.74855900 | 0.92219600  |
| C | -5.18298900 | 0.03089200  | -3.09806800 |
| C | -3.83021200 | 3.86697500  | -0.37993700 |
| C | -4.01955000 | 1.08695200  | 3.64130200  |
| C | -5.71910300 | -4.18145700 | 1.20747900  |
| C | -7.01124100 | -4.50626100 | 1.63376100  |
| H | -7.73427400 | -3.70350500 | 1.75005800  |
| C | -7.37729900 | -5.82506200 | 1.90177400  |
| H | -8.38697800 | -6.05513000 | 2.22961300  |
| C | -6.43281500 | -6.83850400 | 1.74173600  |
| H | -6.70063000 | -7.87159900 | 1.94691800  |
| C | -5.13580500 | -6.54926100 | 1.32177500  |
| H | -4.39815800 | -7.32997900 | 1.20291900  |
| C | -4.76992100 | -5.22100700 | 1.05151400  |
| C | -5.45560900 | -0.19313600 | -4.55553200 |
| C | -6.59628900 | 0.35375800  | -5.16340900 |
| H | -7.28692000 | 0.94048400  | -4.56394600 |
| C | -6.85162000 | 0.14438900  | -6.51926100 |
| H | -7.74262800 | 0.57189400  | -6.97157600 |
| C | -5.96970900 | -0.61491700 | -7.29043400 |
| H | -6.16842100 | -0.77814100 | -8.34625000 |
| C | -4.83158100 | -1.16415600 | -6.69728700 |
| H | -4.13806500 | -1.75445300 | -7.29041800 |
| C | -4.57739900 | -0.95524400 | -5.34102400 |
| H | -3.68857600 | -1.38030600 | -4.88281600 |
| C | -3.48217100 | 5.29744300  | -0.66281500 |
| C | -4.33255000 | 6.33597600  | -0.25249100 |
| H | -5.25298100 | 6.09206700  | 0.27082500  |
| C | -4.01152600 | 7.66807800  | -0.51685200 |
| H | -4.68535300 | 8.45806400  | -0.19566800 |
| C | -2.83333700 | 7.98465100  | -1.19571800 |

|    |             |             |             |
|----|-------------|-------------|-------------|
| H  | -2.58451900 | 9.02191700  | -1.40373000 |
| C  | -1.97794400 | 6.96073700  | -1.60809500 |
| H  | -1.05521600 | 7.19594200  | -2.13146500 |
| C  | -2.29995900 | 5.62847900  | -1.34300000 |
| H  | -1.62964800 | 4.83467700  | -1.66092200 |
| C  | -3.75954000 | 1.31531100  | 5.09988900  |
| C  | -2.63898600 | 0.74837500  | 5.72658700  |
| H  | -1.95272500 | 0.14372900  | 5.14013000  |
| C  | -2.39774500 | 0.96102500  | 7.08450300  |
| H  | -1.52246700 | 0.51738800  | 7.55171600  |
| C  | -3.27392000 | 1.74331000  | 7.83896200  |
| H  | -3.08670300 | 1.90812400  | 8.89665200  |
| C  | -4.39211400 | 2.31266800  | 7.22696600  |
| H  | -5.08187200 | 2.91971800  | 7.80747000  |
| C  | -4.63204300 | 2.10116900  | 5.86862300  |
| H  | -5.50575600 | 2.54082500  | 5.39544500  |
| C  | -2.38608300 | -5.65927900 | 0.36990700  |
| C  | -1.17782800 | -4.92816700 | -0.15762100 |
| C  | 0.06633600  | -5.53828900 | 0.02836200  |
| H  | 0.12047900  | -6.49987500 | 0.52591400  |
| C  | -1.24655400 | -3.71007300 | -0.85162700 |
| H  | -2.20447300 | -3.24309700 | -1.06524600 |
| C  | -0.08276200 | -3.11044100 | -1.33125200 |
| H  | -0.14445500 | -2.18146800 | -1.89076900 |
| O  | -2.36140800 | -6.86973400 | 0.56178600  |
| Zn | 4.60507200  | 0.62641400  | -0.22091600 |
| N  | 4.86712900  | -0.88476800 | -1.57131700 |
| N  | 5.04809900  | -0.65790000 | 1.30430700  |
| N  | 4.28616400  | 2.12010400  | 1.13172300  |
| N  | 4.15807900  | 1.90663000  | -1.74856800 |
| C  | 4.76585900  | -0.79461300 | -2.94291700 |
| C  | 5.27764600  | -2.16995200 | -1.29397600 |
| C  | 5.41092900  | -1.98099800 | 1.18813400  |
| C  | 5.08168000  | -0.36119400 | 2.64925600  |
| C  | 4.42268900  | 2.03731400  | 2.49911800  |
| C  | 3.90229300  | 3.41354800  | 0.85404100  |
| C  | 3.76667200  | 3.22166300  | -1.62819000 |
| C  | 4.09865700  | 1.60193300  | -3.09017500 |
| C  | 5.12481700  | -2.06069100 | -3.54161400 |
| H  | 5.14884200  | -2.26429000 | -4.60215000 |
| C  | 5.43734300  | -2.90962200 | -2.52482200 |
| H  | 5.76330200  | -3.93768400 | -2.59443000 |
| C  | 5.67647200  | -2.53357800 | 2.49695100  |
| H  | 5.98084500  | -3.55179000 | 2.69175500  |

|   |            |             |             |
|---|------------|-------------|-------------|
| C | 5.48169900 | -1.53264900 | 3.39690200  |
| H | 5.60087800 | -1.57606300 | 4.46958900  |
| C | 4.10981300 | 3.31423600  | 3.09833100  |
| H | 4.12638100 | 3.52670100  | 4.15722300  |
| C | 3.79838900 | 4.16521600  | 2.08357100  |
| H | 3.52147800 | 5.20672100  | 2.15609500  |
| C | 3.44428800 | 3.75516500  | -2.93117500 |
| H | 3.09245400 | 4.75809500  | -3.12400400 |
| C | 3.64886300 | 2.75659500  | -3.83267900 |
| H | 3.49448800 | 2.78903000  | -4.90125900 |
| C | 5.52078200 | -2.70214300 | -0.01396600 |
| C | 4.79325800 | 0.88870200  | 3.22286100  |
| C | 3.65450400 | 3.94182200  | -0.42511100 |
| C | 4.39497500 | 0.35225100  | -3.66623900 |
| C | 5.94921600 | -4.14118300 | 0.07437000  |
| C | 7.30481700 | -4.45741500 | 0.21356700  |
| H | 8.02384400 | -3.64362200 | 0.25122200  |
| C | 7.73699300 | -5.78049100 | 0.30057600  |
| H | 8.79485300 | -6.00305000 | 0.40651600  |
| C | 6.79519000 | -6.80770100 | 0.24899800  |
| H | 7.11385900 | -7.84451600 | 0.31656600  |
| C | 5.43673300 | -6.52773000 | 0.11343800  |
| H | 4.70255500 | -7.32011300 | 0.08211600  |
| C | 5.00408400 | -5.19500000 | 0.02403100  |
| C | 4.89060500 | 1.00859500  | 4.71448300  |
| C | 5.93315000 | 1.73694700  | 5.30780500  |
| H | 6.67635800 | 2.21199800  | 4.67329100  |
| C | 6.02588100 | 1.84812800  | 6.69579600  |
| H | 6.84301000 | 2.41270100  | 7.13718600  |
| C | 5.07698200 | 1.23254100  | 7.51406700  |
| H | 5.14929500 | 1.31837200  | 8.59494900  |
| C | 4.03517200 | 0.50529200  | 6.93557100  |
| H | 3.29031500 | 0.02486200  | 7.56460000  |
| C | 3.94298400 | 0.39438100  | 5.54743300  |
| H | 3.12831900 | -0.16804800 | 5.09955700  |
| C | 3.23134000 | 5.37761800  | -0.51377200 |
| C | 4.09924300 | 6.34870700  | -1.03662700 |
| H | 5.08789400 | 6.04993100  | -1.37408800 |
| C | 3.70802400 | 7.68589100  | -1.11710800 |
| H | 4.39596400 | 8.42474600  | -1.51983400 |
| C | 2.44098700 | 8.07396900  | -0.67751400 |
| H | 2.13709300 | 9.11562900  | -0.73886000 |
| C | 1.56739400 | 7.11704000  | -0.15698300 |
| H | 0.57597200 | 7.40648500  | 0.18040900  |

|   |             |             |             |
|---|-------------|-------------|-------------|
| C | 1.96016500  | 5.77989400  | -0.07597400 |
| H | 1.27667700  | 5.03691200  | 0.32582900  |
| C | 4.30756000  | 0.23572500  | -5.15787500 |
| C | 3.30313700  | -0.53788200 | -5.76006500 |
| H | 2.57951300  | -1.04972200 | -5.13164000 |
| C | 3.22204400  | -0.64736000 | -7.14882100 |
| H | 2.43451200  | -1.24787300 | -7.59646600 |
| C | 4.14573600  | 0.01437900  | -7.95979000 |
| H | 4.08372800  | -0.07153900 | -9.04128300 |
| C | 5.14997100  | 0.78673900  | -7.37315700 |
| H | 5.87640500  | 1.30160900  | -7.99641100 |
| C | 5.22925700  | 0.89723900  | -5.98436600 |
| H | 6.01540900  | 1.49411700  | -5.53028600 |
| C | 2.53619200  | -5.65543900 | -0.17330800 |
| C | 1.24026200  | -4.92709400 | -0.42169000 |
| C | 1.15781200  | -3.70843100 | -1.11287900 |
| H | 2.04844300  | -3.24143700 | -1.52540400 |
| O | 2.56291100  | -6.87122300 | -0.02056400 |
| N | 3.64813200  | -4.84311600 | -0.12592100 |
| N | -3.47922300 | -4.85859900 | 0.61817900  |
| H | 3.47855600  | -3.84648200 | -0.14511800 |
| H | -3.33933100 | -3.86150000 | 0.52630000  |

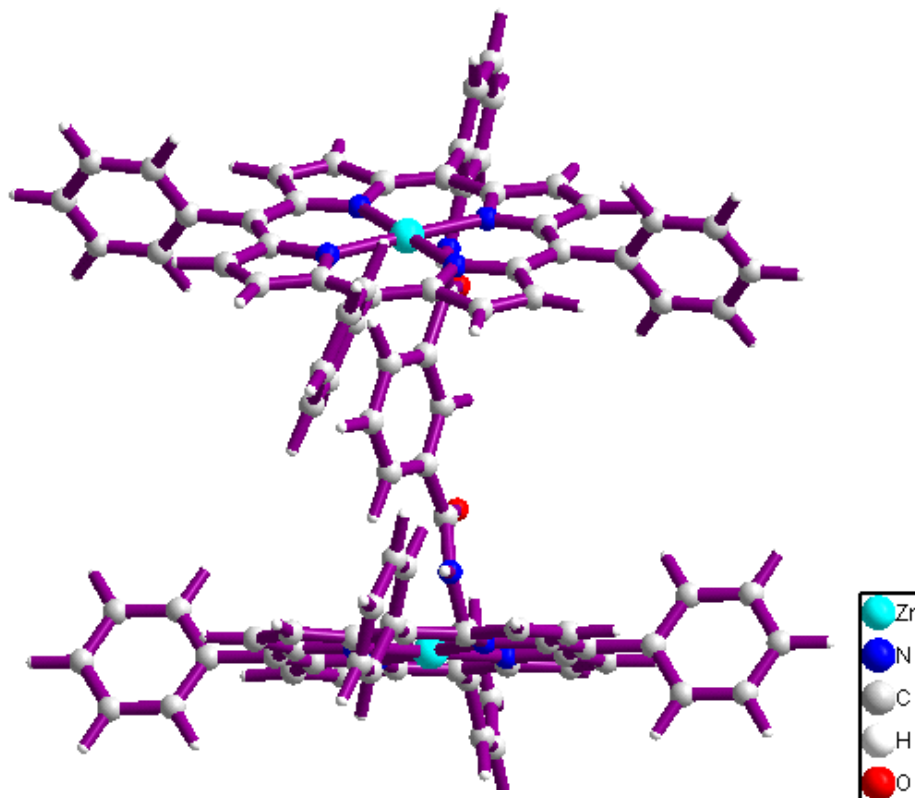

## Conformer II

$$\Delta H^\circ = -7950.83352331 \text{ hartree}$$

Cartesian coordinates for Geometry Optimized **Conformer II**

| Atoms | x          | y           | z           |
|-------|------------|-------------|-------------|
| Zn    | 4.61128500 | 0.56466200  | 0.27358400  |
| N     | 4.65958600 | -0.60408800 | 1.94759900  |
| N     | 5.12684200 | -1.04929900 | -0.86902700 |
| N     | 4.51958000 | 1.71944900  | -1.40778400 |
| N     | 4.07716400 | 2.17214500  | 1.41233400  |
| C     | 4.40188000 | -0.20464800 | 3.24079200  |
| C     | 5.00692500 | -1.93493900 | 2.01300000  |
| C     | 5.42483100 | -2.31505800 | -0.41495400 |
| C     | 5.33985600 | -1.06337200 | -2.23068700 |
| C     | 4.79815600 | 1.32375100  | -2.69700200 |
| C     | 4.18369400 | 3.05381200  | -1.47186400 |
| C     | 3.77221600 | 3.43610800  | 0.95759000  |
| C     | 3.85708300 | 2.18140600  | 2.77137400  |
| C     | 4.59846200 | -1.31758400 | 4.14285400  |
| H     | 4.47827100 | -1.27837100 | 5.21556900  |
| C     | 4.96405100 | -2.38630600 | 3.38512100  |

|   |            |             |             |
|---|------------|-------------|-------------|
| H | 5.19584600 | -3.38805800 | 3.71718000  |
| C | 5.83282600 | -3.14961100 | -1.52193700 |
| H | 6.13163100 | -4.18515800 | -1.44261100 |
| C | 5.78406800 | -2.37667500 | -2.64074000 |
| H | 6.03697100 | -2.66110100 | -3.65167300 |
| C | 4.62583400 | 2.43996200  | -3.59742300 |
| H | 4.76914500 | 2.40549000  | -4.66745600 |
| C | 4.25695600 | 3.50909500  | -2.84094700 |
| H | 4.05210500 | 4.51542700  | -3.17561400 |
| C | 3.33953400 | 4.25975400  | 2.06286300  |
| H | 3.02184400 | 5.28930300  | 1.98624400  |
| C | 3.39204200 | 3.48632500  | 3.18104400  |
| H | 3.12450900 | 3.76394500  | 4.19003600  |
| C | 5.36150100 | -2.74855900 | 0.92219600  |
| C | 5.18298900 | 0.03089200  | -3.09806800 |
| C | 3.83021200 | 3.86697500  | -0.37993700 |
| C | 4.01955000 | 1.08695200  | 3.64130200  |
| C | 5.71910300 | -4.18145700 | 1.20747900  |
| C | 7.01124100 | -4.50626100 | 1.63376100  |
| H | 7.73427400 | -3.70350500 | 1.75005800  |
| C | 7.37729900 | -5.82506200 | 1.90177400  |
| H | 8.38697800 | -6.05513000 | 2.22961300  |
| C | 6.43281500 | -6.83850400 | 1.74173600  |
| H | 6.70063000 | -7.87159900 | 1.94691800  |
| C | 5.13580500 | -6.54926100 | 1.32177500  |
| H | 4.39815800 | -7.32997900 | 1.20291900  |
| C | 4.76992100 | -5.22100700 | 1.05151400  |
| C | 5.45560900 | -0.19313600 | -4.55553200 |
| C | 6.59628900 | 0.35375800  | -5.16340900 |
| H | 7.28692000 | 0.94048400  | -4.56394600 |
| C | 6.85162000 | 0.14438900  | -6.51926100 |
| H | 7.74262800 | 0.57189400  | -6.97157600 |
| C | 5.96970900 | -0.61491700 | -7.29043400 |
| H | 6.16842100 | -0.77814100 | -8.34625000 |
| C | 4.83158100 | -1.16415600 | -6.69728700 |
| H | 4.13806500 | -1.75445300 | -7.29041800 |
| C | 4.57739900 | -0.95524400 | -5.34102400 |
| H | 3.68857600 | -1.38030600 | -4.88281600 |
| C | 3.48217100 | 5.29744300  | -0.66281500 |
| C | 4.33255000 | 6.33597600  | -0.25249100 |
| H | 5.25298100 | 6.09206700  | 0.27082500  |
| C | 4.01152600 | 7.66807800  | -0.51685200 |
| H | 4.68535300 | 8.45806400  | -0.19566800 |
| C | 2.83333700 | 7.98465100  | -1.19571800 |

|    |             |             |             |
|----|-------------|-------------|-------------|
| H  | 2.58451900  | 9.02191700  | -1.40373000 |
| C  | 1.97794400  | 6.96073700  | -1.60809500 |
| H  | 1.05521600  | 7.19594200  | -2.13146500 |
| C  | 2.29995900  | 5.62847900  | -1.34300000 |
| H  | 1.62964800  | 4.83467700  | -1.66092200 |
| C  | 3.75954000  | 1.31531100  | 5.09988900  |
| C  | 2.63898600  | 0.74837500  | 5.72658700  |
| H  | 1.95272500  | 0.14372900  | 5.14013000  |
| C  | 2.39774500  | 0.96102500  | 7.08450300  |
| H  | 1.52246700  | 0.51738800  | 7.55171600  |
| C  | 3.27392000  | 1.74331000  | 7.83896200  |
| H  | 3.08670300  | 1.90812400  | 8.89665200  |
| C  | 4.39211400  | 2.31266800  | 7.22696600  |
| H  | 5.08187200  | 2.91971800  | 7.80747000  |
| C  | 4.63204300  | 2.10116900  | 5.86862300  |
| H  | 5.50575600  | 2.54082500  | 5.39544500  |
| C  | 2.38608300  | -5.65927900 | 0.36990700  |
| C  | 1.17782800  | -4.92816700 | -0.15762100 |
| C  | -0.06633600 | -5.53828900 | 0.02836200  |
| H  | -0.12047900 | -6.49987500 | 0.52591400  |
| C  | 1.24655400  | -3.71007300 | -0.85162700 |
| H  | 2.20447300  | -3.24309700 | -1.06524600 |
| C  | 0.08276200  | -3.11044100 | -1.33125200 |
| H  | 0.14445500  | -2.18146800 | -1.89076900 |
| O  | 2.36140800  | -6.86973400 | 0.56178600  |
| Zn | -4.60507200 | 0.62641400  | -0.22091600 |
| N  | -4.86712900 | -0.88476800 | -1.57131700 |
| N  | -5.04809900 | -0.65790000 | 1.30430700  |
| N  | -4.28616400 | 2.12010400  | 1.13172300  |
| N  | -4.15807900 | 1.90663000  | -1.74856800 |
| C  | -4.76585900 | -0.79461300 | -2.94291700 |
| C  | -5.27764600 | -2.16995200 | -1.29397600 |
| C  | -5.41092900 | -1.98099800 | 1.18813400  |
| C  | -5.08168000 | -0.36119400 | 2.64925600  |
| C  | -4.42268900 | 2.03731400  | 2.49911800  |
| C  | -3.90229300 | 3.41354800  | 0.85404100  |
| C  | -3.76667200 | 3.22166300  | -1.62819000 |
| C  | -4.09865700 | 1.60193300  | -3.09017500 |
| C  | -5.12481700 | -2.06069100 | -3.54161400 |
| H  | -5.14884200 | -2.26429000 | -4.60215000 |
| C  | -5.43734300 | -2.90962200 | -2.52482200 |
| H  | -5.76330200 | -3.93768400 | -2.59443000 |
| C  | -5.67647200 | -2.53357800 | 2.49695100  |
| H  | -5.98084500 | -3.55179000 | 2.69175500  |

|   |             |             |             |
|---|-------------|-------------|-------------|
| C | -5.48169900 | -1.53264900 | 3.39690200  |
| H | -5.60087800 | -1.57606300 | 4.46958900  |
| C | -4.10981300 | 3.31423600  | 3.09833100  |
| H | -4.12638100 | 3.52670100  | 4.15722300  |
| C | -3.79838900 | 4.16521600  | 2.08357100  |
| H | -3.52147800 | 5.20672100  | 2.15609500  |
| C | -3.44428800 | 3.75516500  | -2.93117500 |
| H | -3.09245400 | 4.75809500  | -3.12400400 |
| C | -3.64886300 | 2.75659500  | -3.83267900 |
| H | -3.49448800 | 2.78903000  | -4.90125900 |
| C | -5.52078200 | -2.70214300 | -0.01396600 |
| C | -4.79325800 | 0.88870200  | 3.22286100  |
| C | -3.65450400 | 3.94182200  | -0.42511100 |
| C | -4.39497500 | 0.35225100  | -3.66623900 |
| C | -5.94921600 | -4.14118300 | 0.07437000  |
| C | -7.30481700 | -4.45741500 | 0.21356700  |
| H | -8.02384400 | -3.64362200 | 0.25122200  |
| C | -7.73699300 | -5.78049100 | 0.30057600  |
| H | -8.79485300 | -6.00305000 | 0.40651600  |
| C | -6.79519000 | -6.80770100 | 0.24899800  |
| H | -7.11385900 | -7.84451600 | 0.31656600  |
| C | -5.43673300 | -6.52773000 | 0.11343800  |
| H | -4.70255500 | -7.32011300 | 0.08211600  |
| C | -5.00408400 | -5.19500000 | 0.02403100  |
| C | -4.89060500 | 1.00859500  | 4.71448300  |
| C | -5.93315000 | 1.73694700  | 5.30780500  |
| H | -6.67635800 | 2.21199800  | 4.67329100  |
| C | -6.02588100 | 1.84812800  | 6.69579600  |
| H | -6.84301000 | 2.41270100  | 7.13718600  |
| C | -5.07698200 | 1.23254100  | 7.51406700  |
| H | -5.14929500 | 1.31837200  | 8.59494900  |
| C | -4.03517200 | 0.50529200  | 6.93557100  |
| H | -3.29031500 | 0.02486200  | 7.56460000  |
| C | -3.94298400 | 0.39438100  | 5.54743300  |
| H | -3.12831900 | -0.16804800 | 5.09955700  |
| C | -3.23134000 | 5.37761800  | -0.51377200 |
| C | -4.09924300 | 6.34870700  | -1.03662700 |
| H | -5.08789400 | 6.04993100  | -1.37408800 |
| C | -3.70802400 | 7.68589100  | -1.11710800 |
| H | -4.39596400 | 8.42474600  | -1.51983400 |
| C | -2.44098700 | 8.07396900  | -0.67751400 |
| H | -2.13709300 | 9.11562900  | -0.73886000 |
| C | -1.56739400 | 7.11704000  | -0.15698300 |
| H | -0.57597200 | 7.40648500  | 0.18040900  |



|   |             |             |             |
|---|-------------|-------------|-------------|
| C | -1.96016500 | 5.77989400  | -0.07597400 |
| H | -1.27667700 | 5.03691200  | 0.32582900  |
| C | -4.30756000 | 0.23572500  | -5.15787500 |
| C | -3.30313700 | -0.53788200 | -5.76006500 |
| H | -2.57951300 | -1.04972200 | -5.13164000 |
| C | -3.22204400 | -0.64736000 | -7.14882100 |
| H | -2.43451200 | -1.24787300 | -7.59646600 |
| C | -4.14573600 | 0.01437900  | -7.95979000 |
| H | -4.08372800 | -0.07153900 | -9.04128300 |
| C | -5.14997100 | 0.78673900  | -7.37315700 |
| H | -5.87640500 | 1.30160900  | -7.99641100 |
| C | -5.22925700 | 0.89723900  | -5.98436600 |
| H | -6.01540900 | 1.49411700  | -5.53028600 |
| C | -2.53619200 | -5.65543900 | -0.17330800 |
| C | -1.24026200 | -4.92709400 | -0.42169000 |
| C | -1.15781200 | -3.70843100 | -1.11287900 |
| H | -2.04844300 | -3.24143700 | -1.52540400 |
| O | -2.56291100 | -6.87122300 | -0.02056400 |
| N | -3.64813200 | -4.84311600 | -0.12592100 |
| N | 3.47922300  | -4.85859900 | 0.61817900  |
| H | -3.47855600 | -3.84648200 | -0.14511800 |
| H | 3.33933100  | -3.86150000 | 0.52630000  |

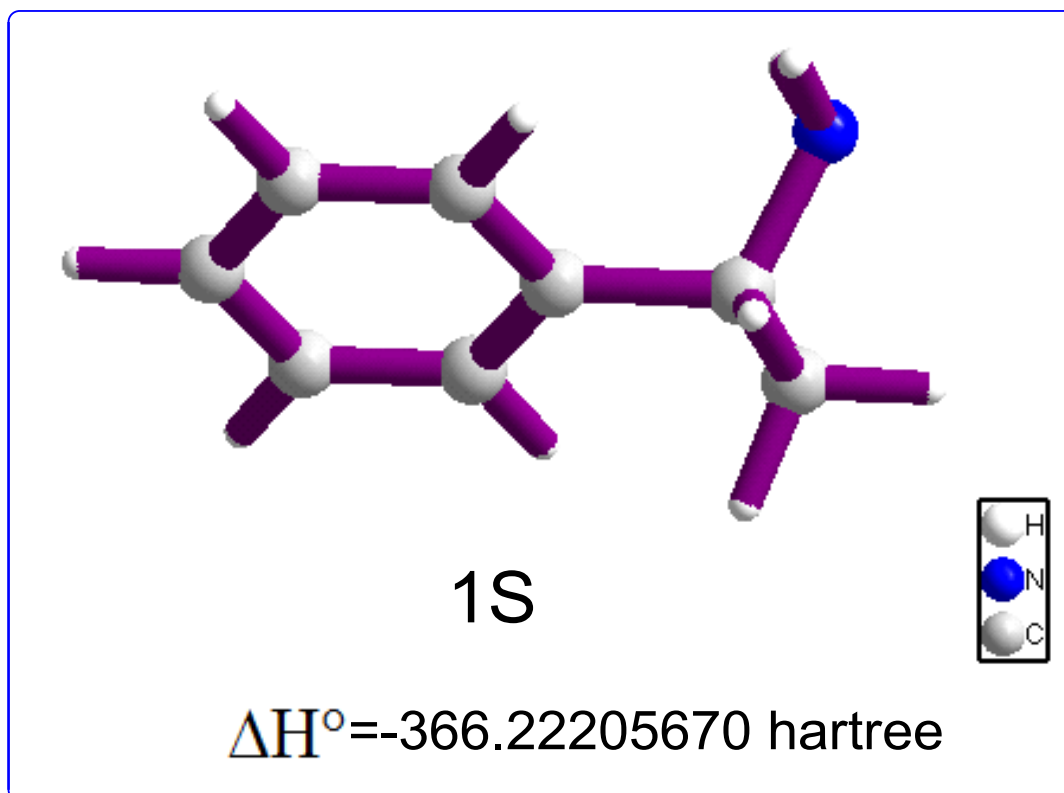

Cartesian coordinates for Geometry Optimized **1S**

| Atoms | x           | y          | z           |
|-------|-------------|------------|-------------|
| H     | 6.56054021  | 0.82429791 | 2.51965342  |
| N     | 6.28729410  | 1.21306114 | 1.61571963  |
| C     | 6.82734571  | 2.52065973 | 1.57359946  |
| H     | 6.86284665  | 0.74018264 | 0.91842367  |
| C     | 8.30404129  | 2.82668814 | 1.38420963  |
| H     | 6.27020803  | 3.02808849 | 0.78038733  |
| C     | 6.29440672  | 3.01975784 | 2.92521001  |
| C     | 9.26967808  | 2.30927814 | 2.26171187  |
| C     | 8.72620278  | 3.65440703 | 0.33782289  |
| H     | 6.43622086  | 4.10055402 | 3.02144761  |
| H     | 5.22075455  | 2.81220165 | 3.01502173  |
| H     | 6.81185064  | 2.53902418 | 3.76373316  |
| C     | 10.62138221 | 2.61575372 | 2.09724737  |
| H     | 8.97334102  | 1.66243754 | 3.08494384  |
| C     | 10.07687905 | 3.97284084 | 0.17717432  |
| H     | 7.99485246  | 4.04458938 | -0.36524155 |
| H     | 11.35567684 | 2.20344160 | 2.78392708  |
| C     | 11.02804025 | 3.45477310 | 1.05633779  |
| H     | 10.38347497 | 4.62407603 | -0.63614111 |
| H     | 12.07756071 | 3.70717549 | 0.93623940  |

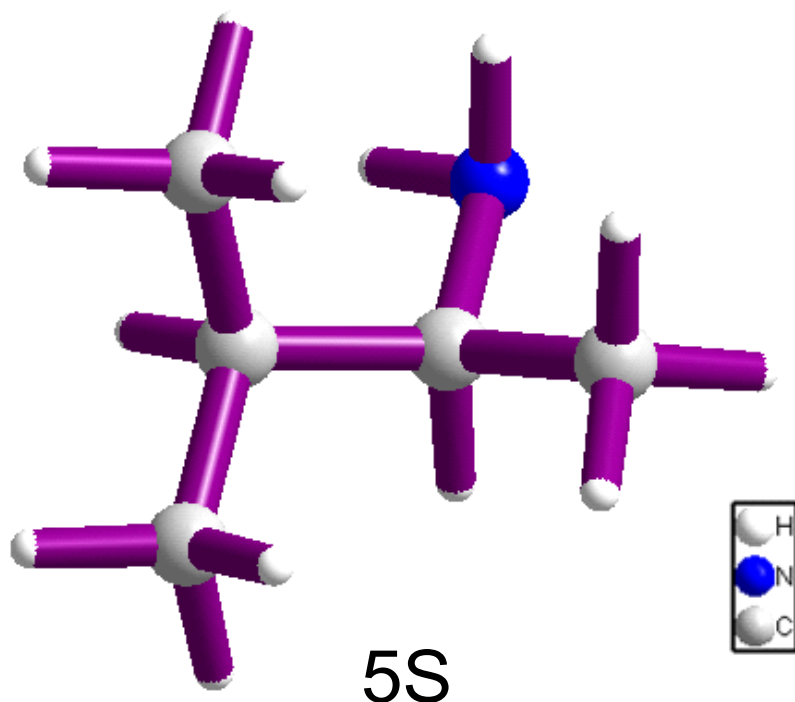

$$\Delta H^\circ = -366.22205670 \text{ hartree}$$

Cartesian coordinates for Geometry Optimized **5S**

| Atoms | x           | y           | z           |
|-------|-------------|-------------|-------------|
| H     | 6.91812500  | -0.58495700 | -0.63862600 |
| N     | 6.70165500  | 0.03626300  | 0.14291800  |
| C     | 7.57450100  | 1.24145900  | 0.07869900  |
| H     | 6.90545800  | -0.49970100 | 0.98750700  |
| C     | 9.03557300  | 0.89135500  | -0.31277800 |
| H     | 7.16215600  | 1.85597300  | -0.73100700 |
| C     | 7.42962300  | 2.01910500  | 1.38824100  |
| C     | 9.77233500  | 0.04050800  | 0.73349200  |
| C     | 9.84264100  | 2.15128000  | -0.66206000 |
| H     | 8.96114000  | 0.29175500  | -1.23455900 |
| H     | 6.38321300  | 2.28386600  | 1.56071300  |
| H     | 7.77389900  | 1.43075500  | 2.24755100  |
| H     | 8.01314700  | 2.94419800  | 1.36183800  |
| H     | 9.94409400  | 0.60014200  | 1.66013200  |
| H     | 9.22131300  | -0.87272800 | 0.98890700  |
| H     | 10.75163100 | -0.26928800 | 0.35225300  |
| H     | 9.32331700  | 2.76639500  | -1.40673500 |
| H     | 10.02239500 | 2.77360500  | 0.22221500  |
| H     | 10.82050400 | 1.88079400  | -1.07588900 |

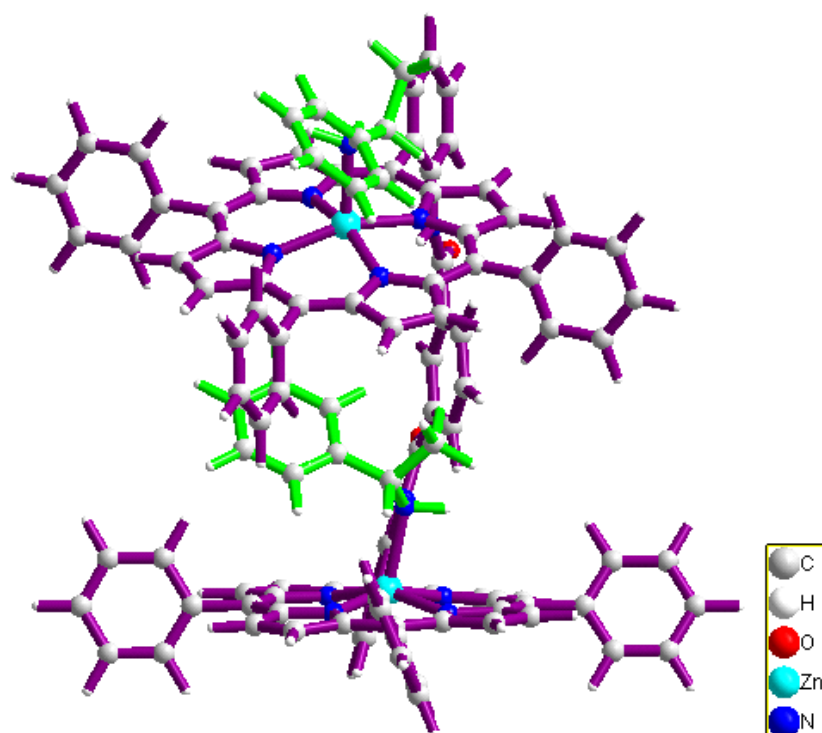

“inside-outside” **Conformer I•1S**

$\Delta H^\circ = -8683.32447956$  hartree

Cartesian coordinates for Geometry Optimized “inside-outside” **Conformer I•1S**

| Atoms | x           | y          | z           |
|-------|-------------|------------|-------------|
| C     | 5.26175100  | 4.87925300 | -0.55392200 |
| C     | 6.58770100  | 5.31524600 | -0.65511900 |
| H     | 7.37661200  | 4.56782300 | -0.66649100 |
| C     | 6.90796200  | 6.66984300 | -0.73482800 |
| H     | 7.94537300  | 6.98246800 | -0.81255400 |
| C     | 5.88044900  | 7.61212900 | -0.70815800 |
| H     | 6.10982100  | 8.67293600 | -0.76375200 |
| C     | 4.54888700  | 7.21431300 | -0.60834500 |
| H     | 3.75076000  | 7.94199200 | -0.57256000 |
| C     | 4.22909300  | 5.84881600 | -0.53491300 |
| C     | 1.73858200  | 6.11357000 | -0.30933300 |
| C     | 0.47318500  | 5.30017300 | -0.39713200 |
| C     | -0.64623500 | 5.77460100 | 0.29319800  |
| H     | -0.57198300 | 6.68562100 | 0.87611200  |
| C     | 0.35562800  | 4.15105700 | -1.19284400 |

|    |             |             |             |
|----|-------------|-------------|-------------|
| H  | 1.19746500  | 3.79505200  | -1.78105700 |
| C  | -0.87207800 | 3.49464700  | -1.28991800 |
| H  | -0.97148600 | 2.63429700  | -1.94645200 |
| O  | 1.70020200  | 7.32359500  | -0.12002300 |
| Zn | -4.88740900 | -0.54443900 | 0.22698400  |
| N  | -5.68036300 | 1.23627600  | -0.55725400 |
| N  | -5.14826400 | 0.25428100  | 2.11987400  |
| N  | -4.85427400 | -2.43489200 | 1.07530100  |
| N  | -5.40185100 | -1.45760500 | -1.60015900 |
| C  | -5.97268200 | 1.49705800  | -1.87514300 |
| C  | -5.94125900 | 2.39102800  | 0.13858900  |
| C  | -5.41836100 | 1.56210300  | 2.43875000  |
| C  | -4.88994800 | -0.39299800 | 3.30401900  |
| C  | -4.67932100 | -2.71470900 | 2.40787500  |
| C  | -4.82106400 | -3.63772800 | 0.41037100  |
| C  | -5.22327600 | -2.78463700 | -1.90632500 |
| C  | -5.62928000 | -0.80700900 | -2.78833700 |
| C  | -6.42906400 | 2.86582000  | -2.01279900 |
| H  | -6.75052900 | 3.32901700  | -2.93430900 |
| C  | -6.41327900 | 3.41626100  | -0.76878400 |
| H  | -6.71445100 | 4.41383400  | -0.48163500 |
| C  | -5.29848300 | 1.75353300  | 3.86985900  |
| H  | -5.46011400 | 2.68672700  | 4.39000600  |
| C  | -4.97399900 | 0.54585100  | 4.40376800  |
| H  | -4.82336600 | 0.30146800  | 5.44541600  |
| C  | -4.52461300 | -4.14143100 | 2.59156100  |
| H  | -4.37792600 | -4.63776900 | 3.53999300  |
| C  | -4.62467100 | -4.71306700 | 1.35990300  |
| H  | -4.58600400 | -5.76478600 | 1.11573600  |
| C  | -5.31255800 | -2.97323600 | -3.33888300 |
| H  | -5.19392400 | -3.91406800 | -3.85655400 |
| C  | -5.55815100 | -1.75081400 | -3.88443000 |
| H  | -5.67818800 | -1.50864000 | -4.93031400 |
| C  | -5.79522900 | 2.57158700  | 1.53057000  |
| C  | -4.65536000 | -1.77119100 | 3.45468100  |
| C  | -4.96912400 | -3.81779500 | -0.97991900 |
| C  | -5.90200200 | 0.57118200  | -2.93567700 |
| C  | -6.13279800 | 3.92480500  | 2.09454300  |
| C  | -7.35545200 | 4.11712400  | 2.74811200  |
| H  | -8.03320400 | 3.27214600  | 2.83149600  |
| C  | -7.71180500 | 5.35721700  | 3.27712900  |
| H  | -8.66822200 | 5.48220700  | 3.77679700  |
| C  | -6.82894800 | 6.42932900  | 3.15265600  |
| H  | -7.09036600 | 7.40284800  | 3.55896700  |

|   |             |             |             |
|---|-------------|-------------|-------------|
| C | -5.60123400 | 6.27326500  | 2.51180300  |
| H | -4.90982700 | 7.09847400  | 2.41784600  |
| C | -5.24633900 | 5.02368100  | 1.98006000  |
| C | -4.39579700 | -2.27940200 | 4.84257900  |
| C | -5.38919800 | -2.96814800 | 5.55502500  |
| H | -6.35829000 | -3.13010800 | 5.09094200  |
| C | -5.14540800 | -3.43645000 | 6.84704200  |
| H | -5.92820600 | -3.96473800 | 7.38525400  |
| C | -3.90371600 | -3.22210300 | 7.44831200  |
| H | -3.71404100 | -3.58532900 | 8.45494700  |
| C | -2.90792100 | -2.53741900 | 6.74935300  |
| H | -1.93776000 | -2.36749100 | 7.20941600  |
| C | -3.15175300 | -2.06945700 | 5.45689700  |
| H | -2.37343400 | -1.54390800 | 4.91052300  |
| C | -4.86321500 | -5.21427000 | -1.51334400 |
| C | -5.98360100 | -5.85919700 | -2.06152200 |
| H | -6.93429200 | -5.33424800 | -2.08897800 |
| C | -5.88914600 | -7.16013600 | -2.55729100 |
| H | -6.77011700 | -7.64304000 | -2.97215600 |
| C | -4.67111200 | -7.84112300 | -2.51571800 |
| H | -4.59717500 | -8.85416100 | -2.90213500 |
| C | -3.54873200 | -7.21184100 | -1.97435300 |
| H | -2.59441700 | -7.73136200 | -1.94245200 |
| C | -3.64505000 | -5.91129800 | -1.47779200 |
| H | -2.76741100 | -5.42302600 | -1.06287900 |
| C | -6.17715500 | 1.08432200  | -4.31581900 |
| C | -5.31807600 | 2.01726700  | -4.91865700 |
| H | -4.44254700 | 2.36020700  | -4.37402700 |
| C | -5.57262500 | 2.50290200  | -6.20172200 |
| H | -4.89229500 | 3.22226900  | -6.65014500 |
| C | -6.69498800 | 2.06535000  | -6.90696400 |
| H | -6.89544800 | 2.44407300  | -7.90563300 |
| C | -7.56024800 | 1.14054600  | -6.31909800 |
| H | -8.44149400 | 0.80012700  | -6.85662100 |
| C | -7.30370800 | 0.65517300  | -5.03644500 |
| H | -7.98460100 | -0.05629600 | -4.57798600 |
| C | -3.01125000 | 5.68270200  | 1.02719200  |
| C | -1.86758600 | 5.09758600  | 0.23499000  |
| C | -1.97877600 | 3.95862300  | -0.57869900 |
| H | -2.93686900 | 3.46138800  | -0.70983500 |
| O | -2.99929000 | 6.85824900  | 1.37598400  |
| N | -4.02067200 | 4.79719200  | 1.32126100  |
| N | 2.89956800  | 5.38702600  | -0.46186300 |
| H | -3.87543700 | 3.83323100  | 1.05439300  |

|   |             |             |             |
|---|-------------|-------------|-------------|
| H | 2.80576700  | 4.37963200  | -0.46096300 |
| H | 1.45801100  | 0.31678300  | 2.35859900  |
| C | 0.72326500  | -0.44847700 | 2.12573300  |
| C | -0.06873700 | -0.32347700 | 0.98449300  |
| C | 0.58581100  | -1.56500100 | 2.95376700  |
| C | -1.00743000 | -1.31125500 | 0.64970600  |
| H | 0.06075200  | 0.54864800  | 0.34718800  |
| C | -0.35292500 | -2.54775800 | 2.63762000  |
| H | 1.21679400  | -1.67306200 | 3.83124200  |
| C | -1.14454100 | -2.42009300 | 1.49333300  |
| H | -0.47272600 | -3.41667400 | 3.27898000  |
| H | -1.87919200 | -3.18559500 | 1.25822200  |
| C | -1.85148500 | -1.19593400 | -0.60892000 |
| H | -2.43105000 | -2.11755300 | -0.71535100 |
| C | -1.00578700 | -1.01750000 | -1.87886000 |
| H | -0.29668100 | -1.84409700 | -1.99142800 |
| H | -1.65192400 | -0.99963400 | -2.76559200 |
| H | -0.42782300 | -0.08650200 | -1.85155000 |
| N | -2.85731800 | -0.09507600 | -0.45882900 |
| H | -2.44172300 | 0.68422700  | 0.05201700  |
| H | -3.10416900 | 0.26639400  | -1.38128400 |
| H | 3.48355300  | 2.50521800  | -4.72332200 |
| C | 3.79532300  | 2.39342000  | -3.69485400 |
| C | 3.77302200  | 1.15693800  | -2.93967700 |
| C | 4.26717600  | 3.36020500  | -2.85991800 |
| N | 4.21800500  | 1.38711900  | -1.65996100 |
| C | 3.31949300  | -0.07831500 | -3.44449600 |
| C | 4.52037100  | 2.72502500  | -1.58287400 |
| H | 4.42319700  | 4.40732200  | -3.07931400 |
| C | 3.21336800  | -1.26663300 | -2.69080000 |
| C | 2.90080300  | -0.12469600 | -4.88353800 |
| C | 4.97015800  | 3.40863100  | -0.43315500 |
| N | 3.55680400  | -1.41490200 | -1.36862700 |
| C | 2.72551200  | -2.52695700 | -3.21138600 |
| C | 3.84967200  | 0.00539300  | -5.91005600 |
| C | 1.55338600  | -0.29295900 | -5.24007500 |
| C | 5.15276100  | 2.82322300  | 0.83663800  |
| C | 3.28726700  | -2.71930700 | -1.03287900 |
| C | 2.76749400  | -3.42228200 | -2.18548000 |
| H | 2.39681900  | -2.70093600 | -4.22576100 |
| H | 4.89695300  | 0.13339600  | -5.64994100 |
| C | 3.46485500  | -0.03301400 | -7.25085900 |
| C | 1.16661000  | -0.33135000 | -6.58033800 |
| H | 0.80630800  | -0.38769600 | -4.45684100 |

|    |            |             |             |
|----|------------|-------------|-------------|
| N  | 4.98850300 | 1.49421700  | 1.14123800  |
| C  | 5.51237500 | 3.56152400  | 2.03017500  |
| C  | 3.49831200 | -3.30999000 | 0.22833900  |
| H  | 2.47920200 | -4.46342800 | -2.20493400 |
| H  | 4.21624800 | 0.06591600  | -8.02995500 |
| C  | 2.12139000 | -0.20153900 | -7.59053400 |
| H  | 0.11752600 | -0.45833500 | -6.83459400 |
| C  | 5.23510100 | 1.36765100  | 2.48724700  |
| H  | 5.68323800 | 4.62748200  | 2.07719500  |
| C  | 5.55997800 | 2.66303400  | 3.04994100  |
| C  | 3.99679800 | -2.64211700 | 1.36204700  |
| C  | 3.14469400 | -4.76002700 | 0.38160300  |
| H  | 1.82062300 | -0.23093600 | -8.63432500 |
| C  | 5.15209000 | 0.17519200  | 3.23210000  |
| H  | 5.77438400 | 2.85672600  | 4.09104300  |
| N  | 4.36969100 | -1.32161300 | 1.41882300  |
| C  | 4.14564400 | -3.24892400 | 2.66753300  |
| C  | 1.80361600 | -5.16530600 | 0.46172100  |
| C  | 4.14910300 | -5.73743100 | 0.45209100  |
| C  | 4.73624000 | -1.07065700 | 2.71794200  |
| C  | 5.50679200 | 0.24490000  | 4.68758500  |
| C  | 4.61144200 | -2.28147200 | 3.50330200  |
| H  | 3.91453800 | -4.27650700 | 2.90817000  |
| H  | 1.01984700 | -4.41378000 | 0.42519400  |
| C  | 1.47580800 | -6.51453800 | 0.60583200  |
| C  | 3.82024600 | -7.08648000 | 0.59625500  |
| H  | 5.19012300 | -5.43396400 | 0.38400700  |
| C  | 4.51828300 | 0.13650400  | 5.67819400  |
| C  | 6.83854300 | 0.42658000  | 5.09157700  |
| H  | 4.84298900 | -2.37209300 | 4.55466600  |
| H  | 0.43197300 | -6.81084500 | 0.67218900  |
| C  | 2.48277300 | -7.47931800 | 0.67291400  |
| H  | 4.61055300 | -7.83123500 | 0.64668900  |
| H  | 3.48147300 | 0.00748000  | 5.37997500  |
| C  | 4.85128000 | 0.20422500  | 7.03163300  |
| C  | 7.17363400 | 0.49338000  | 6.44464400  |
| H  | 7.61438500 | 0.51131900  | 4.33542600  |
| H  | 2.22709300 | -8.52956000 | 0.78624500  |
| H  | 4.07012200 | 0.12375900  | 7.78303700  |
| C  | 6.18064500 | 0.38168100  | 7.41937600  |
| H  | 8.21158000 | 0.63065400  | 6.73657600  |
| H  | 6.44033600 | 0.43479200  | 8.47322800  |
| Zn | 4.64183900 | -0.07917900 | -0.21519400 |
| N  | 6.76316000 | -0.19624900 | -0.71364500 |



|   |            |             |             |
|---|------------|-------------|-------------|
| C | 7.25364800 | -0.81296900 | -1.98446500 |
| H | 7.27977400 | -0.57599700 | 0.07999900  |
| H | 6.95923300 | 0.80581500  | -0.72378200 |
| C | 7.45570000 | -2.30850000 | -1.79842300 |
| H | 6.45209800 | -0.66665500 | -2.71552200 |
| C | 8.51339300 | -0.10692800 | -2.50938100 |
| C | 8.47505400 | -2.80385900 | -0.97154200 |
| C | 6.62935200 | -3.22150200 | -2.46289900 |
| H | 8.83218700 | -0.54596300 | -3.46057600 |
| H | 8.31476400 | 0.95830800  | -2.67923200 |
| H | 9.34819200 | -0.18998000 | -1.80403200 |
| C | 8.66381200 | -4.17660400 | -0.81444300 |
| H | 9.13748500 | -2.11695700 | -0.44832400 |
| C | 6.81909300 | -4.59665200 | -2.31281700 |
| H | 5.82510300 | -2.85498100 | -3.09495500 |
| H | 9.45960600 | -4.54180400 | -0.17077100 |
| C | 7.83737600 | -5.07817900 | -1.48921600 |
| H | 6.16518200 | -5.28881800 | -2.83586400 |
| H | 7.98825500 | -6.14819600 | -1.37385200 |

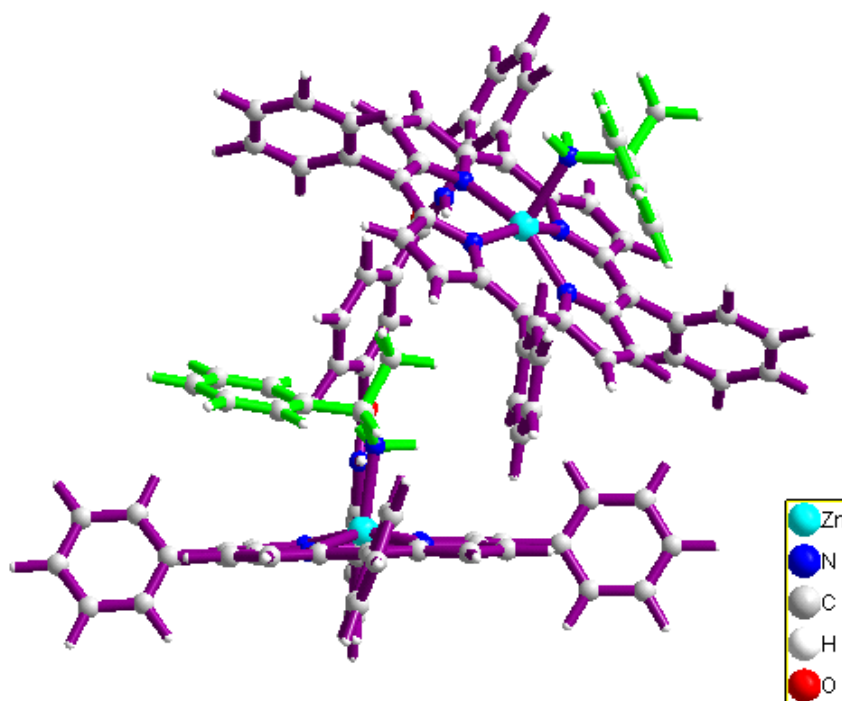

“inside-outside” **Conformer II•1S**

$\Delta H^\circ = -8683.32403656$  hartree

Cartesian coordinates for Geometry Optimized “inside-outside” **Conformer II•1S**

| Atoms | x           | y           | z           |
|-------|-------------|-------------|-------------|
| Zn    | -4.31284400 | -0.30285400 | -0.53873000 |
| N     | -4.60303700 | 1.45270400  | 0.58075000  |
| N     | -4.22810700 | 0.92093500  | -2.25200400 |
| N     | -3.32165500 | -1.75934900 | -1.62834500 |
| N     | -3.64847600 | -1.20679100 | 1.20479000  |
| C     | -4.69619100 | 1.53193200  | 1.94929500  |
| C     | -5.01981300 | 2.66589100  | 0.09037700  |
| C     | -4.69259700 | 2.21014200  | -2.34799800 |
| C     | -3.96487800 | 0.50243700  | -3.53430800 |
| C     | -3.13836300 | -1.79297900 | -2.98946100 |
| C     | -2.81618100 | -2.93621000 | -1.13158900 |
| C     | -3.11528100 | -2.47014800 | 1.30705900  |
| C     | -3.85250900 | -0.75864500 | 2.48801500  |
| C     | -5.20443900 | 2.83482000  | 2.33167900  |
| H     | -5.38676500 | 3.16477900  | 3.34390200  |

|   |             |             |             |
|---|-------------|-------------|-------------|
| C | -5.39645200 | 3.53782800  | 1.18377700  |
| H | -5.75856300 | 4.55060100  | 1.07902600  |
| C | -4.73009900 | 2.61879700  | -3.73671300 |
| H | -5.06168700 | 3.58344300  | -4.09508200 |
| C | -4.28605500 | 1.56164300  | -4.47022800 |
| H | -4.18818800 | 1.49965300  | -5.54430600 |
| C | -2.49108400 | -3.03251800 | -3.36345600 |
| H | -2.20282500 | -3.30991900 | -4.36698600 |
| C | -2.29277000 | -3.73814500 | -2.21660100 |
| H | -1.81432000 | -4.70066400 | -2.10869700 |
| C | -2.98979700 | -2.83420300 | 2.70162000  |
| H | -2.59794800 | -3.76939100 | 3.07348200  |
| C | -3.43342800 | -1.77369800 | 3.43080800  |
| H | -3.45732300 | -1.67981200 | 4.50666000  |
| C | -5.07453200 | 3.03384500  | -1.26925200 |
| C | -3.46251400 | -0.76277800 | -3.89776100 |
| C | -2.73939700 | -3.29694300 | 0.22919000  |
| C | -4.35882100 | 0.50717000  | 2.85475500  |
| C | -5.54608200 | 4.42807700  | -1.58119200 |
| C | -6.90971200 | 4.69492200  | -1.73988600 |
| H | -7.61186000 | 3.86958800  | -1.65575000 |
| C | -7.37444200 | 5.98591000  | -1.99110800 |
| H | -8.43854200 | 6.17010600  | -2.10828400 |
| C | -6.45758700 | 7.03297600  | -2.08189900 |
| H | -6.80272800 | 8.04601500  | -2.27066500 |
| C | -5.09133400 | 6.80165400  | -1.93405700 |
| H | -4.37828200 | 7.61207600  | -1.99167300 |
| C | -4.62716900 | 5.49980400  | -1.68935500 |
| C | -3.22693400 | -1.02800900 | -5.35360800 |
| C | -3.99185100 | -1.98382900 | -6.04104800 |
| H | -4.76408700 | -2.52906400 | -5.50520200 |
| C | -3.77616600 | -2.23341400 | -7.39685300 |
| H | -4.38314300 | -2.97400600 | -7.91119500 |
| C | -2.78858800 | -1.53235800 | -8.09120100 |
| H | -2.61975400 | -1.72648400 | -9.14697700 |
| C | -2.01796100 | -0.58170500 | -7.41951000 |
| H | -1.24152100 | -0.03579500 | -7.94901200 |
| C | -2.23531900 | -0.33263100 | -6.06388600 |
| H | -1.62661300 | 0.40099200  | -5.54281200 |
| C | -2.20026000 | -4.65874700 | 0.54785900  |
| C | -2.92601100 | -5.80735800 | 0.19191000  |
| H | -3.88600900 | -5.69281000 | -0.30326300 |
| C | -2.43414900 | -7.08123100 | 0.48005700  |
| H | -3.01302600 | -7.95785900 | 0.20033100  |

|    |             |             |             |
|----|-------------|-------------|-------------|
| C  | -1.20686700 | -7.22995200 | 1.12874500  |
| H  | -0.82404600 | -8.22148200 | 1.35587300  |
| C  | -0.47534400 | -6.09593200 | 1.48738500  |
| H  | 0.48348400  | -6.19905500 | 1.98718600  |
| C  | -0.96683400 | -4.82150100 | 1.19882600  |
| H  | -0.38732400 | -3.94621100 | 1.47928100  |
| C  | -4.53012100 | 0.78822300  | 4.31703000  |
| C  | -3.73179700 | 1.74402600  | 4.96654800  |
| H  | -2.97738900 | 2.27982100  | 4.39712400  |
| C  | -3.89518400 | 2.00764800  | 6.32797200  |
| H  | -3.26593100 | 2.75063300  | 6.81085100  |
| C  | -4.85956000 | 1.31836700  | 7.06619300  |
| H  | -4.98734000 | 1.52397200  | 8.12550900  |
| C  | -5.65929100 | 0.36519800  | 6.43343700  |
| H  | -6.41602700 | -0.17343200 | 6.99787800  |
| C  | -5.49533200 | 0.10362800  | 5.07259000  |
| H  | -6.12473800 | -0.63518100 | 4.58399600  |
| C  | -2.18694800 | 6.04924800  | -1.42412800 |
| C  | -0.84963200 | 5.35617900  | -1.39768200 |
| C  | 0.17144200  | 5.93147000  | -0.63621900 |
| H  | -0.01483600 | 6.84912600  | -0.08954900 |
| C  | -0.58334100 | 4.20163200  | -2.14795100 |
| H  | -1.35118100 | 3.76941600  | -2.78401700 |
| C  | 0.69097800  | 3.63517500  | -2.12814700 |
| H  | 0.90318300  | 2.77282500  | -2.75361300 |
| O  | -2.28026400 | 7.26611500  | -1.32097900 |
| Zn | 4.35019900  | -0.36906200 | 0.87221400  |
| N  | 5.64604000  | 1.10686500  | 0.19457700  |
| N  | 3.83623500  | 0.92307700  | 2.45729800  |
| N  | 3.62003800  | -1.94442400 | 2.04931900  |
| N  | 5.46281300  | -1.76209900 | -0.18414800 |
| C  | 6.52412500  | 0.98677300  | -0.85553200 |
| C  | 5.71835700  | 2.41117100  | 0.61970200  |
| C  | 4.16226100  | 2.25148700  | 2.57057500  |
| C  | 3.02140300  | 0.62816800  | 3.52491900  |
| C  | 2.82917800  | -1.83971400 | 3.16729200  |
| C  | 3.68551600  | -3.27945700 | 1.73521500  |
| C  | 5.24780800  | -3.11930400 | -0.21170200 |
| C  | 6.33181900  | -1.47966500 | -1.20881900 |
| C  | 7.15475300  | 2.26536700  | -1.11378900 |
| H  | 7.90022300  | 2.45240100  | -1.87300100 |
| C  | 6.65644500  | 3.14498500  | -0.20392600 |
| H  | 6.91277400  | 4.18757900  | -0.07946200 |
| C  | 3.51660700  | 2.82114000  | 3.73547200  |

|   |             |             |             |
|---|-------------|-------------|-------------|
| H | 3.61523100  | 3.84588400  | 4.06517800  |
| C | 2.80995100  | 1.81899700  | 4.32370300  |
| H | 2.22120000  | 1.86773000  | 5.22836200  |
| C | 2.36778300  | -3.15297300 | 3.56476700  |
| H | 1.73473000  | -3.36386400 | 4.41436000  |
| C | 2.90854000  | -4.04374600 | 2.68815900  |
| H | 2.81591100  | -5.12015200 | 2.69939700  |
| C | 5.99357100  | -3.70884100 | -1.30350100 |
| H | 5.99902300  | -4.75685400 | -1.56555200 |
| C | 6.66255500  | -2.69654000 | -1.91853200 |
| H | 7.31427900  | -2.76260600 | -2.77738900 |
| C | 5.02844600  | 2.96501800  | 1.71689900  |
| C | 2.52120200  | -0.64640200 | 3.85425200  |
| C | 4.42052500  | -3.84246000 | 0.67114300  |
| C | 6.83453900  | -0.20428400 | -1.53901400 |
| C | 5.33358100  | 4.39592800  | 2.07517500  |
| C | 6.44099600  | 4.67320100  | 2.88513900  |
| H | 7.04627400  | 3.84008900  | 3.23149900  |
| C | 6.77118800  | 5.97848000  | 3.24754400  |
| H | 7.63541500  | 6.16730400  | 3.87803900  |
| C | 5.97850000  | 7.03151300  | 2.79247900  |
| H | 6.21948700  | 8.05546600  | 3.06566100  |
| C | 4.86897500  | 6.79222600  | 1.98438600  |
| H | 4.24769500  | 7.60397000  | 1.63433200  |
| C | 4.54047200  | 5.47612100  | 1.62115400  |
| C | 1.64108500  | -0.74946600 | 5.06479300  |
| C | 2.11638600  | -1.33662100 | 6.24822500  |
| H | 3.13400200  | -1.71623500 | 6.27890200  |
| C | 1.30229100  | -1.42718400 | 7.37791900  |
| H | 1.69052700  | -1.88127700 | 8.28607100  |
| C | -0.00208600 | -0.93025800 | 7.34444500  |
| H | -0.63597400 | -0.99890300 | 8.22468300  |
| C | -0.48744600 | -0.34312100 | 6.17465100  |
| H | -1.50054500 | 0.04829600  | 6.13828700  |
| C | 0.32843700  | -0.25431000 | 5.04525900  |
| H | -0.05587200 | 0.19783400  | 4.13491400  |
| C | 4.32724600  | -5.32588200 | 0.47780700  |
| C | 5.43603200  | -6.15546300 | 0.71014100  |
| H | 6.36972300  | -5.70930500 | 1.04082600  |
| C | 5.34679600  | -7.53647400 | 0.53005500  |
| H | 6.21613800  | -8.16083800 | 0.71964700  |
| C | 4.14590900  | -8.11535400 | 0.11500700  |
| H | 4.07698600  | -9.19090300 | -0.02515400 |
| C | 3.03441700  | -7.30307400 | -0.11700600 |

|   |             |             |             |
|---|-------------|-------------|-------------|
| H | 2.09326800  | -7.74038800 | -0.44029200 |
| C | 3.12539200  | -5.92202600 | 0.06307900  |
| H | 2.25565700  | -5.29661300 | -0.11879300 |
| C | 7.80648100  | -0.11254800 | -2.67618200 |
| C | 7.45717600  | 0.54281200  | -3.86723900 |
| H | 6.46237900  | 0.96811100  | -3.96238600 |
| C | 8.36423800  | 0.63665000  | -4.92372900 |
| H | 8.07381900  | 1.14518200  | -5.83965200 |
| C | 9.63803900  | 0.07717300  | -4.80782600 |
| H | 10.34503900 | 0.15119700  | -5.62994400 |
| C | 9.99824800  | -0.57692700 | -3.62815700 |
| H | 10.98972800 | -1.01055800 | -3.52577000 |
| C | 9.09060400  | -0.67039000 | -2.57233000 |
| H | 9.37676000  | -1.17186100 | -1.65197000 |
| C | 2.46481600  | 6.00842600  | 0.30425100  |
| C | 1.43453800  | 5.33607700  | -0.56720400 |
| C | 1.69459700  | 4.18895600  | -1.33314600 |
| H | 2.69313700  | 3.75781700  | -1.35323900 |
| O | 2.39613600  | 7.20805300  | 0.54790400  |
| N | 3.44007000  | 5.16956500  | 0.79299300  |
| N | -3.25750800 | 5.19339500  | -1.56953200 |
| H | 3.31206700  | 4.17834200  | 0.63519800  |
| H | -3.05846300 | 4.20610300  | -1.46916700 |
| H | 1.84383100  | 0.02126800  | 0.68327100  |
| N | 2.44805100  | -0.01081500 | -0.13982000 |
| C | 1.85060100  | -0.96137000 | -1.12138400 |
| H | 2.42775600  | 0.93658500  | -0.51866100 |
| C | 2.58733600  | -0.92941800 | -2.45116300 |
| H | 1.98818600  | -1.95484000 | -0.68202600 |
| C | 0.34412500  | -0.71297200 | -1.30732500 |
| C | 2.82793200  | 0.27130800  | -3.13307200 |
| C | 2.97425400  | -2.12790600 | -3.06161800 |
| H | -0.08794000 | -1.43805500 | -2.00380700 |
| H | -0.19046100 | -0.80497900 | -0.35428200 |
| H | 0.15794100  | 0.29096900  | -1.70780100 |
| C | 3.43357800  | 0.27454100  | -4.39004000 |
| H | 2.54487000  | 1.22175200  | -2.68685000 |
| C | 3.57842000  | -2.13083300 | -4.31939900 |
| H | 2.81082600  | -3.06818900 | -2.54168900 |
| H | 3.60840800  | 1.21772200  | -4.90146000 |
| C | 3.80781100  | -0.92939600 | -4.98985800 |
| H | 3.87726800  | -3.07328600 | -4.76973300 |
| H | 4.27988100  | -0.92923900 | -5.96845100 |
| H | -7.21710600 | -6.69008900 | 0.10124200  |

|   |             |             |             |
|---|-------------|-------------|-------------|
| C | -7.22135900 | -5.60412400 | 0.14136700  |
| C | -6.61355500 | -4.93780200 | 1.20606700  |
| C | -7.83711700 | -4.86739200 | -0.87298900 |
| C | -6.62188600 | -3.54219600 | 1.25718500  |
| H | -6.12489600 | -5.50132900 | 1.99594700  |
| C | -7.84972800 | -3.47431100 | -0.81483400 |
| H | -8.31358000 | -5.37741800 | -1.70597200 |
| C | -7.24237700 | -2.79339300 | 0.25113200  |
| H | -6.13376000 | -3.03131400 | 2.08284600  |
| H | -8.34718000 | -2.91687700 | -1.60623800 |
| C | -7.27036700 | -1.27502000 | 0.32503600  |
| N | -6.44653500 | -0.68982400 | -0.77812200 |
| H | -6.78483900 | -0.96962400 | 1.25725300  |
| C | -8.69983000 | -0.71090900 | 0.32572600  |
| H | -6.75777200 | 0.26470300  | -0.96424200 |
| H | -6.60191200 | -1.21075000 | -1.64128300 |
| H | -9.27357000 | -1.11981400 | 1.16397900  |
| H | -8.68211600 | 0.38073700  | 0.43056600  |
| H | -9.23347100 | -0.95749500 | -0.59941300 |

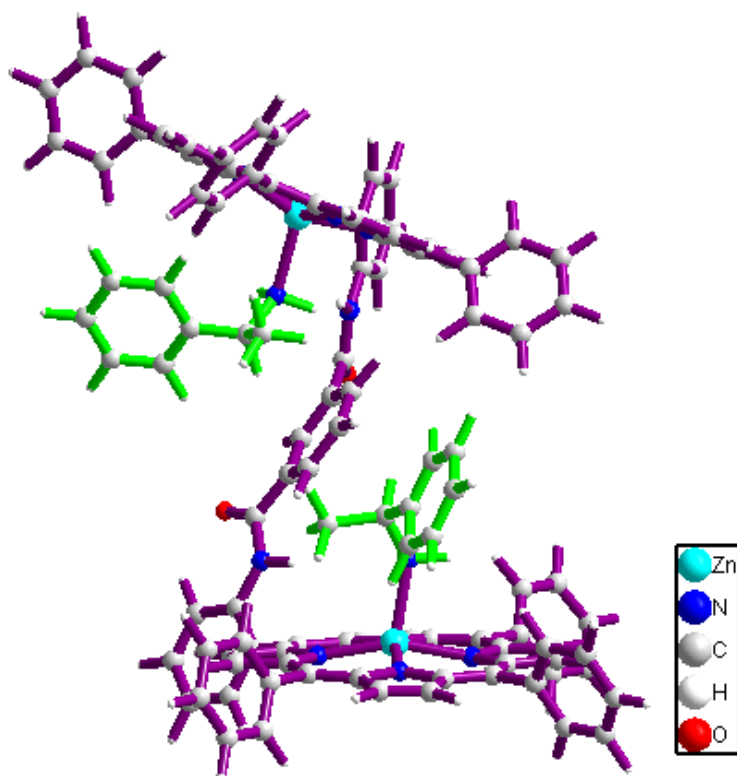

**“inside-inside” Conformer I•1S**

$\Delta H^\circ = -8683.31791620$  hartree

Cartesian coordinates for Geometry Optimized “inside-inside” **Conformer I•1S**

| Atoms | x           | y           | z           |
|-------|-------------|-------------|-------------|
| Zn    | -5.64959900 | 0.67289000  | -0.90310900 |
| N     | -6.80217600 | -1.03912900 | -0.56816700 |
| N     | -4.82082000 | -0.34044600 | -2.56509500 |
| N     | -5.02331000 | 2.44435700  | -1.78798900 |
| N     | -7.02443000 | 1.75310300  | 0.19011400  |
| C     | -7.77402900 | -1.16836200 | 0.39492400  |
| C     | -6.60949000 | -2.29145000 | -1.09940000 |
| C     | -4.91397800 | -1.68498200 | -2.83421600 |
| C     | -3.93619500 | 0.18286200  | -3.47848100 |
| C     | -4.09650400 | 2.58158700  | -2.79288200 |
| C     | -5.29900200 | 3.71128700  | -1.33185100 |
| C     | -7.02908800 | 3.11550700  | 0.37124000  |
| C     | -7.98591200 | 1.23949800  | 1.02564200  |
| C     | -8.19606000 | -2.55103300 | 0.48393600  |
| H     | -8.95478100 | -2.93041800 | 1.15306200  |



|   |             |             |             |
|---|-------------|-------------|-------------|
| C | -7.47249300 | -3.24625400 | -0.43353100 |
| H | -7.52387400 | -4.30244100 | -0.65479100 |
| C | -4.04858300 | -2.02480300 | -3.94447700 |
| H | -3.94199600 | -3.01052100 | -4.37552600 |
| C | -3.43441100 | -0.87345000 | -4.33388300 |
| H | -2.72329500 | -0.74638500 | -5.13715300 |
| C | -3.77006700 | 3.98082100  | -2.96936800 |
| H | -3.08126300 | 4.37525800  | -3.70223700 |
| C | -4.50400800 | 4.67708200  | -2.06016600 |
| H | -4.51908600 | 5.74582600  | -1.90386000 |
| C | -8.02591400 | 3.47183900  | 1.35838400  |
| H | -8.25590400 | 4.47725400  | 1.67987400  |
| C | -8.60978000 | 2.31258300  | 1.76906700  |
| H | -9.40210000 | 2.19200900  | 2.49361800  |
| C | -5.72532900 | -2.61427200 | -2.14939400 |
| C | -3.56891600 | 1.53916200  | -3.58221300 |
| C | -6.21920600 | 4.04149200  | -0.31658600 |
| C | -8.32717800 | -0.12110200 | 1.15404300  |
| C | -5.67991100 | -4.04934700 | -2.59888700 |
| C | -6.73138000 | -4.57437400 | -3.35931300 |
| H | -7.55371300 | -3.91589600 | -3.62459400 |
| C | -6.73910500 | -5.90683400 | -3.77072800 |
| H | -7.56711600 | -6.29000000 | -4.36020200 |
| C | -5.67611500 | -6.73651800 | -3.41510000 |
| H | -5.66887400 | -7.77859200 | -3.72330600 |
| C | -4.61026400 | -6.24687500 | -2.66268500 |
| H | -3.78850800 | -6.88710100 | -2.37392000 |
| C | -4.60338500 | -4.90401300 | -2.25610400 |
| C | -2.57076400 | 1.90637300  | -4.63944100 |
| C | -2.90581500 | 1.83572100  | -6.00088700 |
| H | -3.90677800 | 1.52169500  | -6.28314200 |
| C | -1.97401900 | 2.16784600  | -6.98537000 |
| H | -2.25509000 | 2.10985300  | -8.03364000 |
| C | -0.68842500 | 2.57672000  | -6.62662100 |
| H | 0.03836100  | 2.83232200  | -7.39293800 |
| C | -0.34252200 | 2.65598100  | -5.27640900 |
| H | 0.65890500  | 2.96539800  | -4.98810400 |
| C | -1.27693000 | 2.32605000  | -4.29338000 |
| H | -1.00778600 | 2.39280200  | -3.24221900 |
| C | -6.37399600 | 5.49008500  | 0.03909500  |
| C | -6.97904000 | 6.38828800  | -0.85405700 |
| H | -7.33986600 | 6.02116500  | -1.81084500 |
| C | -7.12722200 | 7.73536800  | -0.52140300 |
| H | -7.60221000 | 8.41433400  | -1.22480100 |

|    |              |             |             |
|----|--------------|-------------|-------------|
| C  | -6.67352700  | 8.20830300  | 0.71136000  |
| H  | -6.78910500  | 9.25730400  | 0.97064100  |
| C  | -6.07159500  | 7.32510400  | 1.60935500  |
| H  | -5.71269000  | 7.68432400  | 2.57037400  |
| C  | -5.92385600  | 5.97805000  | 1.27564800  |
| H  | -5.45145600  | 5.29380500  | 1.97529500  |
| C  | -9.38114800  | -0.48032700 | 2.15993700  |
| C  | -9.02933700  | -1.09087400 | 3.37340300  |
| H  | -7.98188600  | -1.28920800 | 3.58334000  |
| C  | -10.00815200 | -1.43167600 | 4.30855900  |
| H  | -9.71799300  | -1.90264500 | 5.24425500  |
| C  | -11.35351400 | -1.16771000 | 4.04524800  |
| H  | -12.11537500 | -1.43441200 | 4.77293600  |
| C  | -11.71485700 | -0.55974500 | 2.84149800  |
| H  | -12.76019600 | -0.35372700 | 2.62647600  |
| C  | -10.73612700 | -0.21903800 | 1.90648800  |
| H  | -11.01938200 | 0.24821600  | 0.96721400  |
| C  | -2.44691600  | -4.95871400 | -0.95321600 |
| C  | -1.48334600  | -4.00566900 | -0.29023300 |
| C  | -0.78061300  | -4.46847000 | 0.82518000  |
| H  | -0.95513200  | -5.47460000 | 1.18918600  |
| C  | -1.24113700  | -2.70815800 | -0.76781200 |
| H  | -1.73415100  | -2.35266900 | -1.66980300 |
| C  | -0.32573600  | -1.88371100 | -0.11134100 |
| H  | -0.14133600  | -0.87817100 | -0.48105600 |
| O  | -2.24374800  | -6.16704800 | -0.95640100 |
| Zn | 5.86885100   | -0.19137600 | 0.54743000  |
| N  | 5.47750100   | -2.26589200 | 0.56602900  |
| N  | 5.50432500   | -0.18225100 | 2.58657100  |
| N  | 6.90503600   | 1.58051800  | 0.76533900  |
| N  | 6.88212600   | -0.50138200 | -1.25912800 |
| C  | 5.66508000   | -3.14838300 | -0.47316400 |
| C  | 5.01233200   | -3.00641200 | 1.62742500  |
| C  | 4.94298800   | -1.18540000 | 3.33925800  |
| C  | 5.61730600   | 0.91222100  | 3.41237400  |
| C  | 6.85612800   | 2.42040000  | 1.85187000  |
| C  | 7.59119900   | 2.24820000  | -0.22100600 |
| C  | 7.52411600   | 0.47569900  | -1.98239000 |
| C  | 6.76292100   | -1.58990700 | -2.08958000 |
| C  | 5.29400800   | -4.48400900 | -0.05441500 |
| H  | 5.36510600   | -5.37294100 | -0.66400600 |
| C  | 4.89833200   | -4.39783500 | 1.24397900  |
| H  | 4.58484000   | -5.20247800 | 1.89416100  |
| C  | 4.65740600   | -0.69581200 | 4.67174400  |

|   |             |             |             |
|---|-------------|-------------|-------------|
| H | 4.21255200  | -1.27473300 | 5.46794500  |
| C | 5.07668900  | 0.59708700  | 4.71763800  |
| H | 5.04634900  | 1.27126400  | 5.56122100  |
| C | 7.53189600  | 3.66128900  | 1.53914500  |
| H | 7.64580500  | 4.49892800  | 2.21177900  |
| C | 7.99588400  | 3.54967900  | 0.26376600  |
| H | 8.56833200  | 4.27507900  | -0.29608200 |
| C | 7.79032200  | -0.00185400 | -3.32206200 |
| H | 8.27068900  | 0.56668000  | -4.10509000 |
| C | 7.31684700  | -1.27571800 | -3.39002800 |
| H | 7.33647900  | -1.94126700 | -4.24055500 |
| C | 4.71951300  | -2.51323800 | 2.91666200  |
| C | 6.23258600  | 2.13569500  | 3.08415300  |
| C | 7.86893100  | 1.75793300  | -1.51160300 |
| C | 6.20315500  | -2.83672000 | -1.73795100 |
| C | 4.27330200  | -3.49837400 | 3.96286300  |
| C | 5.17906100  | -3.85812400 | 4.97040100  |
| H | 6.17152400  | -3.41748700 | 4.94724000  |
| C | 4.83725800  | -4.75604400 | 5.97939600  |
| H | 5.56244600  | -5.01817100 | 6.74442500  |
| C | 3.55859200  | -5.31117000 | 5.98877700  |
| H | 3.27088800  | -6.01287000 | 6.76709400  |
| C | 2.63218500  | -4.97989300 | 5.00286500  |
| H | 1.64285500  | -5.41330800 | 5.00201600  |
| C | 2.98100700  | -4.07877400 | 3.98338100  |
| C | 6.26278700  | 3.20045800  | 4.13998200  |
| C | 7.46149200  | 3.53421500  | 4.78979700  |
| H | 8.37301600  | 3.00674000  | 4.52262500  |
| C | 7.48899300  | 4.52312100  | 5.77403600  |
| H | 8.42631600  | 4.76422700  | 6.26864900  |
| C | 6.31739600  | 5.19550800  | 6.12684600  |
| H | 6.33851400  | 5.96529800  | 6.89361500  |
| C | 5.11840200  | 4.87191700  | 5.48944000  |
| H | 4.20152300  | 5.39156300  | 5.75534700  |
| C | 5.09214900  | 3.88299800  | 4.50496800  |
| H | 4.15783600  | 3.63731900  | 4.00742300  |
| C | 8.59142200  | 2.67093800  | -2.45694000 |
| C | 9.92565000  | 2.42432800  | -2.81552500 |
| H | 10.43700700 | 1.56314100  | -2.39430700 |
| C | 10.59680600 | 3.27464900  | -3.69548500 |
| H | 11.63160300 | 3.07015900  | -3.95774100 |
| C | 9.94398700  | 4.38523400  | -4.23352500 |
| H | 10.46629800 | 5.04705500  | -4.91927200 |
| C | 8.61609300  | 4.63997600  | -3.88573400 |

|   |             |             |             |
|---|-------------|-------------|-------------|
| H | 8.09830700  | 5.49942000  | -4.30389700 |
| C | 7.94577900  | 3.79062800  | -3.00416800 |
| H | 6.90971900  | 3.98603100  | -2.74065200 |
| C | 6.22141400  | -3.92650200 | -2.76502500 |
| C | 5.02209600  | -4.45359200 | -3.27068800 |
| H | 4.07599400  | -4.05622800 | -2.91337100 |
| C | 5.03265100  | -5.47126600 | -4.22515600 |
| H | 4.09273100  | -5.86184100 | -4.60619800 |
| C | 6.24499400  | -5.98380900 | -4.69002400 |
| H | 6.25428700  | -6.77757000 | -5.43213400 |
| C | 7.44537000  | -5.47264200 | -4.19280300 |
| H | 8.39418800  | -5.87138800 | -4.54220700 |
| C | 7.43354300  | -4.45397200 | -3.23959400 |
| H | 8.36921700  | -4.06579900 | -2.84726300 |
| C | 0.82689200  | -4.22847700 | 2.69661500  |
| C | 0.14375100  | -3.65041300 | 1.48271700  |
| C | 0.35798900  | -2.34616800 | 1.01426800  |
| H | 1.03523100  | -1.67815300 | 1.53936100  |
| O | 0.27946600  | -5.10298000 | 3.35907400  |
| N | 2.07343000  | -3.70976500 | 2.96488900  |
| N | -3.54064200 | -4.34445300 | -1.51648600 |
| H | 2.47205300  | -3.10312900 | 2.26011700  |
| H | -3.64327800 | -3.35507100 | -1.33569700 |
| H | -2.37526400 | -1.01051500 | 3.51228600  |
| C | -3.28775500 | -0.46204500 | 3.73703700  |
| C | -3.91159800 | -0.63981100 | 4.97318500  |
| C | -3.82009000 | 0.41246700  | 2.78072100  |
| C | -5.08433500 | 0.05643500  | 5.26731400  |
| H | -3.48123000 | -1.32145000 | 5.70185400  |
| C | -4.99954200 | 1.10592800  | 3.08617900  |
| C | -5.62697300 | 0.92783700  | 4.31954200  |
| H | -5.57295800 | -0.07779600 | 6.22879100  |
| H | -5.43688200 | 1.78135900  | 2.35850700  |
| H | -6.54266900 | 1.47115800  | 4.53557500  |
| H | 3.47150500  | 5.99613200  | -2.54665800 |
| C | 3.34244400  | 5.01171800  | -2.10485200 |
| C | 2.27248300  | 4.20413600  | -2.49156300 |
| C | 4.24318500  | 4.54879400  | -1.14272400 |
| C | 2.11017000  | 2.94101600  | -1.91896100 |
| H | 1.56059000  | 4.55650100  | -3.23332400 |
| C | 4.07407000  | 3.28900600  | -0.56668800 |
| H | 5.07900400  | 5.16821800  | -0.82919400 |
| C | 3.00306000  | 2.46942700  | -0.94871400 |
| H | 1.27750500  | 2.31298300  | -2.22958400 |

|   |             |             |             |
|---|-------------|-------------|-------------|
| H | 4.77952700  | 2.94588500  | 0.18214000  |
| C | 2.77589500  | 1.10869600  | -0.31142200 |
| H | 1.89466100  | 0.67084900  | -0.80428600 |
| C | -3.11623400 | 0.57727400  | 1.44422500  |
| H | -2.17145500 | 0.01954500  | 1.51293700  |
| C | -2.78200400 | 2.02987600  | 1.09494700  |
| H | -2.13258000 | 2.46167200  | 1.86348100  |
| H | -2.26099200 | 2.08853100  | 0.13203900  |
| H | -3.68527600 | 2.64095300  | 1.01833100  |
| C | 2.48087500  | 1.20663200  | 1.18932400  |
| H | 1.57155000  | 1.79273200  | 1.35789300  |
| H | 2.33890900  | 0.21230700  | 1.62816100  |
| H | 3.30779700  | 1.68410900  | 1.72129700  |
| N | -3.93142600 | -0.02708900 | 0.34078700  |
| H | -3.31005600 | -0.21941600 | -0.44687700 |
| H | -4.27003100 | -0.93986100 | 0.64932800  |
| N | 3.94221100  | 0.19874700  | -0.53427700 |
| H | 3.62423500  | -0.76767700 | -0.44162000 |
| H | 4.25855300  | 0.28975500  | -1.50063000 |

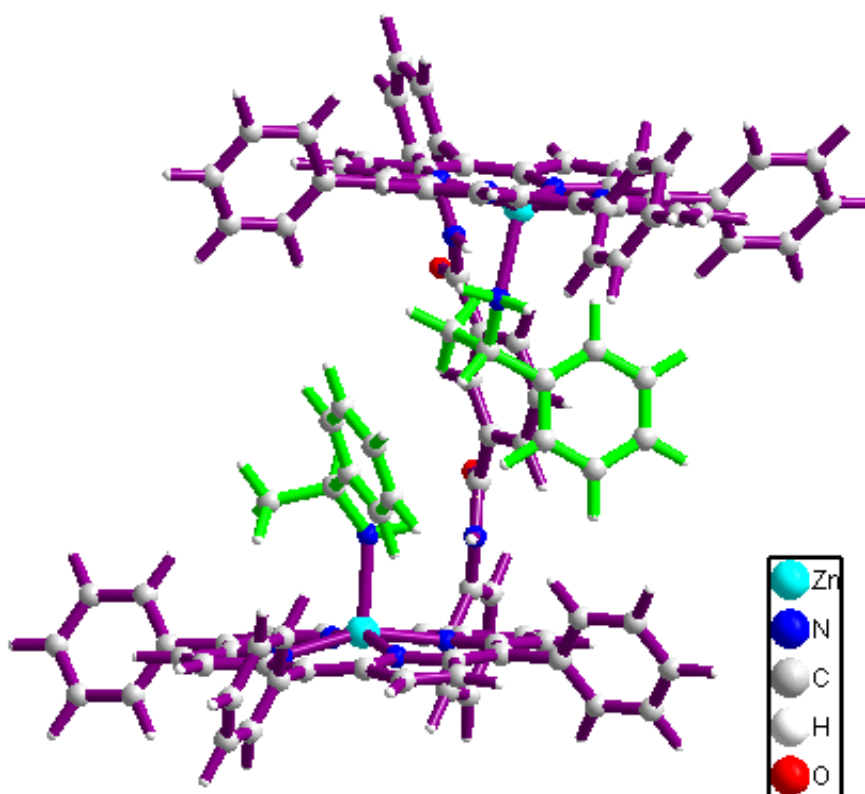

**“inside-inside” Conformer II•1S**  
 $\Delta H^\circ = -8683.31736109$  hartree

Cartesian coordinates for Geometry Optimized “inside-inside” **Conformer II•1S**

| Atoms | x          | y           | z           |
|-------|------------|-------------|-------------|
| Zn    | 5.37427300 | 0.53025700  | -0.61765100 |
| N     | 6.36040700 | -1.05213800 | 0.33854500  |
| N     | 4.94535800 | -0.80669400 | -2.18598000 |
| N     | 5.01985100 | 2.07919300  | -1.94398700 |
| N     | 6.47214000 | 1.83329400  | 0.55741700  |
| C     | 7.07705800 | -0.96788500 | 1.50925900  |
| C     | 6.33703000 | -2.38258300 | -0.00946200 |
| C     | 5.09703100 | -2.17339100 | -2.16951100 |
| C     | 4.32664600 | -0.49533900 | -3.37441700 |
| C     | 4.43410000 | 1.99477700  | -3.18574600 |
| C     | 5.24261300 | 3.41468100  | -1.70193400 |
| C     | 6.41207400 | 3.20538800  | 0.49557400  |
| C     | 7.12258400 | 1.52030000  | 1.72646400  |
| C     | 7.49858200 | -2.29047200 | 1.92205300  |

|   |            |             |             |
|---|------------|-------------|-------------|
| H | 8.08754200 | -2.51380000 | 2.79958000  |
| C | 7.03986100 | -3.16375000 | 0.98632200  |
| H | 7.17315200 | -4.23537000 | 0.95941500  |
| C | 4.52144400 | -2.74590700 | -3.36754900 |
| H | 4.51964700 | -3.79760900 | -3.61950400 |
| C | 4.02886200 | -1.71098000 | -4.10315800 |
| H | 3.53558700 | -1.76278500 | -5.06278800 |
| C | 4.29183700 | 3.32111200  | -3.74673500 |
| H | 3.89430100 | 3.54713700  | -4.72537800 |
| C | 4.78898200 | 4.19646100  | -2.83032200 |
| H | 4.87267000 | 5.26979900  | -2.92025100 |
| C | 7.01995900 | 3.77485400  | 1.67874000  |
| H | 7.09516500 | 4.82997900  | 1.89778100  |
| C | 7.45857600 | 2.73472500  | 2.43849400  |
| H | 7.95914800 | 2.78183300  | 3.39457200  |
| C | 5.74854200 | -2.92396700 | -1.16987600 |
| C | 4.06827200 | 0.80643300  | -3.85099000 |
| C | 5.84919400 | 3.95855600  | -0.55280000 |
| C | 7.41493800 | 0.22021700  | 2.18654300  |
| C | 5.94504400 | -4.39859700 | -1.39916300 |
| C | 7.19536900 | -4.84602900 | -1.84864500 |
| H | 7.96364200 | -4.10524400 | -2.05172600 |
| C | 7.46768200 | -6.20135600 | -2.02029600 |
| H | 8.44695100 | -6.52145700 | -2.36454800 |
| C | 6.47214400 | -7.13671600 | -1.73629300 |
| H | 6.66784500 | -8.19889500 | -1.85610900 |
| C | 5.21522000 | -6.72432000 | -1.30328200 |
| H | 4.44600000 | -7.44827800 | -1.07332800 |
| C | 4.93983700 | -5.35695700 | -1.14007700 |
| C | 3.40997700 | 0.94666400  | -5.19022300 |
| C | 4.06282000 | 0.53569500  | -6.36394100 |
| H | 5.06092300 | 0.11266500  | -6.29414500 |
| C | 3.45081600 | 0.67701400  | -7.60997500 |
| H | 3.97614800 | 0.35717300  | -8.50609300 |
| C | 2.17398400 | 1.23357600  | -7.70775200 |
| H | 1.69786300 | 1.34308700  | -8.67840000 |
| C | 1.51491400 | 1.65130200  | -6.55048100 |
| H | 0.52037600 | 2.08491800  | -6.61418800 |
| C | 2.12914200 | 1.51130100  | -5.30472100 |
| H | 1.61302300 | 1.84103200  | -4.40724800 |
| C | 5.91437400 | 5.45228400  | -0.44969900 |
| C | 7.14026600 | 6.12946100  | -0.54505400 |
| H | 8.05070900 | 5.55770800  | -0.70194500 |
| C | 7.19629500 | 7.52062300  | -0.45048200 |

|    |             |             |             |
|----|-------------|-------------|-------------|
| H  | 8.15422200  | 8.02764700  | -0.53221900 |
| C  | 6.02715900  | 8.25879100  | -0.25706600 |
| H  | 6.07089100  | 9.34212700  | -0.18270600 |
| C  | 4.80172000  | 7.59687500  | -0.16021100 |
| H  | 3.88699000  | 8.16312200  | -0.00475300 |
| C  | 4.74564400  | 6.20589200  | -0.25705100 |
| H  | 3.79214800  | 5.69155100  | -0.17237100 |
| C  | 8.17243600  | 0.09137700  | 3.47322900  |
| C  | 7.56972800  | -0.47181900 | 4.60909900  |
| H  | 6.53874200  | -0.80993400 | 4.54994000  |
| C  | 8.27510800  | -0.59588000 | 5.80665700  |
| H  | 7.78845200  | -1.03083700 | 6.67571900  |
| C  | 9.59880000  | -0.16030400 | 5.88926800  |
| H  | 10.14921400 | -0.25755800 | 6.82119500  |
| C  | 10.21159900 | 0.39915400  | 4.76650500  |
| H  | 11.24399000 | 0.73492100  | 4.81912200  |
| C  | 9.50481300  | 0.52393100  | 3.56994400  |
| H  | 9.98704700  | 0.95170000  | 2.69545400  |
| C  | 2.67875500  | -5.61337400 | -0.09347700 |
| C  | 1.34234300  | -4.92720400 | -0.00476300 |
| C  | 0.52657400  | -5.23666200 | 1.08728400  |
| H  | 0.88457800  | -5.91634700 | 1.85204400  |
| C  | 0.85236700  | -4.08379300 | -1.01316000 |
| H  | 1.45759300  | -3.86180900 | -1.88852600 |
| C  | -0.44535900 | -3.57799900 | -0.93197800 |
| H  | -0.84024900 | -2.96412400 | -1.73505500 |
| O  | 2.85336600  | -6.72508800 | 0.38907600  |
| Zn | -5.39709900 | 0.30905600  | 0.63555100  |
| N  | -5.56970700 | -1.75762300 | 0.56244200  |
| N  | -4.91258900 | 0.14819000  | 2.65188400  |
| N  | -5.92800600 | 2.31859600  | 1.01795800  |
| N  | -6.57110700 | 0.40787800  | -1.07861900 |
| C  | -6.05112000 | -2.50227800 | -0.48876900 |
| C  | -5.26341400 | -2.64809700 | 1.56570000  |
| C  | -4.61351600 | -1.00589100 | 3.33332000  |
| C  | -4.65444400 | 1.19056200  | 3.51155400  |
| C  | -5.55478800 | 3.06038300  | 2.11203800  |
| C  | -6.48381600 | 3.19414300  | 0.11804700  |
| C  | -6.98604700 | 1.55860500  | -1.70846900 |
| C  | -6.79778600 | -0.62421400 | -1.95748200 |
| C  | -6.02980000 | -3.90791500 | -0.14200400 |
| H  | -6.37774400 | -4.71322600 | -0.77200400 |
| C  | -5.55079800 | -3.99715600 | 1.12757900  |
| H  | -5.43153500 | -4.88790400 | 1.72763600  |



|   |              |             |             |
|---|--------------|-------------|-------------|
| C | -4.11909700  | -0.68162700 | 4.65457000  |
| H | -3.81205500  | -1.40061200 | 5.40021400  |
| C | -4.14267600  | 0.67381400  | 4.76446800  |
| H | -3.87071400  | 1.27007900  | 5.62320300  |
| C | -5.88881600  | 4.45301000  | 1.89468900  |
| H | -5.70487300  | 5.25912500  | 2.58979000  |
| C | -6.47973000  | 4.53208700  | 0.67129700  |
| H | -6.87596600  | 5.41245000  | 0.18631300  |
| C | -7.45029700  | 1.24422100  | -3.04217000 |
| H | -7.81501900  | 1.96100600  | -3.76336700 |
| C | -7.32980300  | -0.10190200 | -3.19791400 |
| H | -7.57349500  | -0.68754200 | -4.07206700 |
| C | -4.78954200  | -2.32120000 | 2.85321000  |
| C | -4.92522700  | 2.55304300  | 3.26967000  |
| C | -6.96949700  | 2.85807600  | -1.16175900 |
| C | -6.57266900  | -1.99319500 | -1.69524000 |
| C | -4.61030400  | -3.44305200 | 3.84048600  |
| C | -5.55262400  | -3.56844100 | 4.87142900  |
| H | -6.36545700  | -2.84904800 | 4.91163800  |
| C | -5.47377700  | -4.58493800 | 5.82052900  |
| H | -6.22215900  | -4.65859400 | 6.60439000  |
| C | -4.42758500  | -5.50278700 | 5.74331800  |
| H | -4.34588000  | -6.30399400 | 6.47304000  |
| C | -3.47135000  | -5.40930300 | 4.73525500  |
| H | -2.65709600  | -6.11625300 | 4.67529900  |
| C | -3.55321500  | -4.38501700 | 3.77630100  |
| C | -4.54819900  | 3.53072200  | 4.34132400  |
| C | -5.52902300  | 4.22138900  | 5.07092900  |
| H | -6.57754700  | 4.03331700  | 4.85794300  |
| C | -5.17132700  | 5.13275300  | 6.06530500  |
| H | -5.94657600  | 5.65344300  | 6.62132000  |
| C | -3.82555200  | 5.36925500  | 6.35181200  |
| H | -3.54760300  | 6.07862400  | 7.12661000  |
| C | -2.83942900  | 4.68518000  | 5.63893700  |
| H | -1.78876900  | 4.86139500  | 5.85457700  |
| C | -3.19914400  | 3.77497500  | 4.64431100  |
| H | -2.42915000  | 3.24056000  | 4.09363900  |
| C | -7.52458800  | 3.96781800  | -2.00401600 |
| C | -8.90100700  | 4.04229600  | -2.26994400 |
| H | -9.56179900  | 3.28788300  | -1.85220200 |
| C | -9.42324600  | 5.07277600  | -3.05254200 |
| H | -10.49246700 | 5.11512800  | -3.24300600 |
| C | -8.57759700  | 6.04783700  | -3.58471200 |
| H | -8.98372300  | 6.85022300  | -4.19478600 |

|   |             |             |             |
|---|-------------|-------------|-------------|
| C | -7.20684600 | 5.98585600  | -3.32798600 |
| H | -6.53998700 | 6.73819600  | -3.74121300 |
| C | -6.68606700 | 4.95540600  | -2.54404700 |
| H | -5.61784000 | 4.90843000  | -2.35019400 |
| C | -6.96066900 | -2.98336500 | -2.74901200 |
| C | -5.99911600 | -3.82651600 | -3.33126900 |
| H | -4.96409000 | -3.75050000 | -3.00997900 |
| C | -6.35669500 | -4.75367800 | -4.31086700 |
| H | -5.59528700 | -5.39252700 | -4.75067200 |
| C | -7.68564300 | -4.86025100 | -4.72428600 |
| H | -7.96543200 | -5.58327700 | -5.48570600 |
| C | -8.65369100 | -4.03504500 | -4.14874900 |
| H | -9.69309700 | -4.11807000 | -4.45541000 |
| C | -8.29494900 | -3.10687600 | -3.17094500 |
| H | -9.05397300 | -2.47617400 | -2.71722400 |
| C | -1.54325700 | -5.07581500 | 2.43136800  |
| C | -0.75744300 | -4.69418400 | 1.20174300  |
| C | -1.24784100 | -3.88221500 | 0.16769300  |
| H | -2.27006900 | -3.51480200 | 0.18201600  |
| O | -1.21534900 | -6.04948800 | 3.10136100  |
| N | -2.60636100 | -4.25375700 | 2.73740300  |
| N | 3.65429900  | -4.90602100 | -0.76713000 |
| H | -2.74195400 | -3.44049500 | 2.15279900  |
| H | 3.47198300  | -3.92812800 | -0.94852200 |
| H | 0.59006700  | 1.82107600  | 2.83462400  |
| C | 0.78472700  | 2.32877100  | 1.89200800  |
| C | 0.01472800  | 3.43558000  | 1.53689900  |
| C | 1.81053200  | 1.86238900  | 1.05480600  |
| C | 0.24929900  | 4.09284100  | 0.32514900  |
| H | -0.76738300 | 3.78768800  | 2.20516300  |
| C | 2.03796900  | 2.52728600  | -0.15543500 |
| C | 1.25997700  | 3.63279300  | -0.51834600 |
| H | -0.34976400 | 4.95545200  | 0.04585600  |
| H | 2.83419700  | 2.20197400  | -0.81528400 |
| H | 1.45876300  | 4.13272400  | -1.46261000 |
| C | 2.64372200  | 0.67558900  | 1.51782200  |
| H | 1.94222300  | -0.06819600 | 1.92730500  |
| C | 3.61615200  | 1.06691100  | 2.63858000  |
| H | 3.06406600  | 1.44146600  | 3.50598900  |
| H | 4.20706600  | 0.20126300  | 2.95950200  |
| H | 4.30252500  | 1.84599100  | 2.29866000  |
| N | 3.40946700  | 0.04718600  | 0.40439000  |
| H | 3.75866700  | -0.85152900 | 0.74030100  |
| H | 2.77420200  | -0.17745400 | -0.36319400 |

|   |             |             |             |
|---|-------------|-------------|-------------|
| H | 0.09017400  | 0.63469100  | -1.87401900 |
| C | -0.72000100 | 0.05842100  | -2.31719100 |
| C | -0.52647300 | -0.57964200 | -3.54311900 |
| C | -1.94964300 | -0.02214700 | -1.64857900 |
| C | -1.57292500 | -1.29600100 | -4.12922300 |
| H | 0.43331200  | -0.50447900 | -4.04628300 |
| C | -2.99039400 | -0.74808600 | -2.24149100 |
| C | -2.80469100 | -1.37347100 | -3.47718200 |
| H | -1.43055200 | -1.78221900 | -5.09061800 |
| H | -3.95187400 | -0.82095500 | -1.74560200 |
| H | -3.63040600 | -1.91478700 | -3.93064700 |
| C | -2.10195600 | 0.65781300  | -0.29860500 |
| H | -1.38626500 | 1.49061000  | -0.27238700 |
| C | -1.77570200 | -0.27522600 | 0.87349300  |
| H | -1.85254800 | 0.25748000  | 1.82770900  |
| H | -2.47667100 | -1.11441700 | 0.89487700  |
| H | -0.75992500 | -0.66958100 | 0.77707700  |
| N | -3.47827100 | 1.19724600  | -0.10770000 |
| H | -3.44529600 | 1.88791000  | 0.64271000  |
| H | -3.75729000 | 1.71861400  | -0.94018600 |

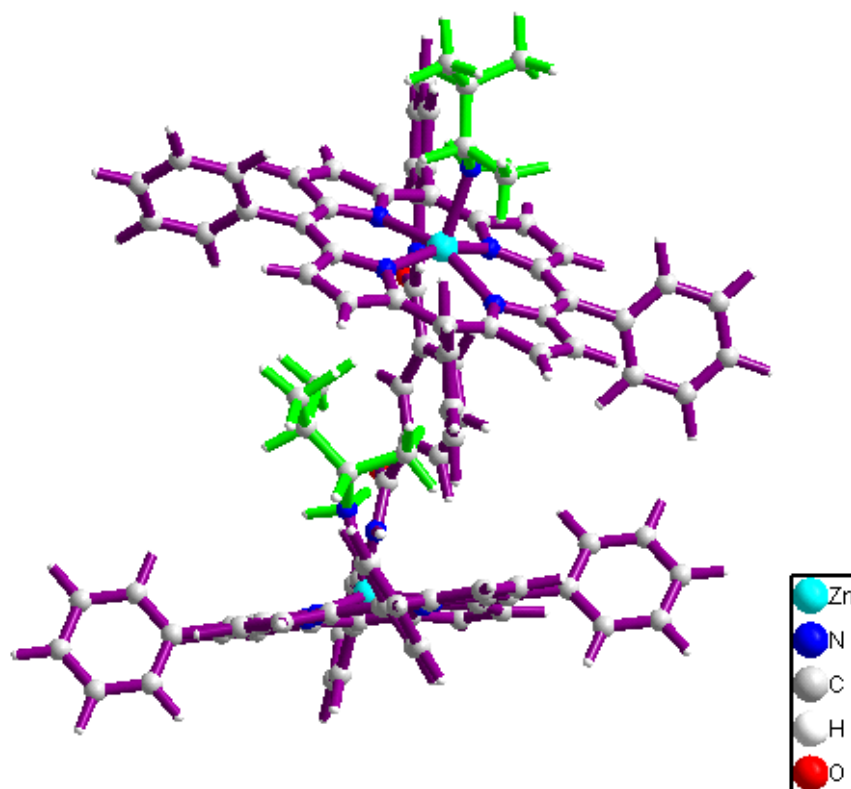

“inside-outside” **Conformer I•5S**  
 $\Delta H^\circ = -8457.11073556$  hartree

Cartesian coordinates for Geometry Optimized “inside-outside” **Conformer I•5S**

| Atoms | x          | y           | z           |
|-------|------------|-------------|-------------|
| Zn    | 4.52919400 | 0.12387200  | -0.05635200 |
| N     | 4.49114000 | -0.79388500 | -1.94735500 |
| N     | 4.21288700 | -1.77818600 | 0.76923700  |
| N     | 3.74088700 | 0.92988400  | 1.68958900  |
| N     | 4.13698200 | 1.92708800  | -1.00481400 |
| C     | 4.55154200 | -0.15390500 | -3.16270300 |
| C     | 4.63951600 | -2.13601300 | -2.20385400 |
| C     | 4.40969400 | -2.98317500 | 0.13859500  |
| C     | 3.98179800 | -2.05944800 | 2.09469500  |
| C     | 3.60713300 | 0.28012400  | 2.89337000  |
| C     | 3.56986200 | 2.27037900  | 1.94570000  |
| C     | 3.84735500 | 3.12158500  | -0.38898300 |
| C     | 4.22080900 | 2.18795300  | -2.35146200 |
| C     | 4.75453600 | -1.12571600 | -4.21798900 |

|   |            |             |             |
|---|------------|-------------|-------------|
| H | 4.84575100 | -0.89848700 | -5.27011100 |
| C | 4.80022300 | -2.34984000 | -3.62712500 |
| H | 4.92730200 | -3.31082900 | -4.10430200 |
| C | 4.31530500 | -4.06126900 | 1.10105500  |
| H | 4.43447500 | -5.11222800 | 0.87763400  |
| C | 4.03412300 | -3.49211000 | 2.30560200  |
| H | 3.87197900 | -3.99342900 | 3.24873100  |
| C | 3.36607000 | 1.24479900  | 3.94517700  |
| H | 3.23893100 | 1.01163700  | 4.99215300  |
| C | 3.34491000 | 2.47290400  | 3.36089100  |
| H | 3.19738000 | 3.42878600  | 3.84176300  |
| C | 3.74776200 | 4.17037200  | -1.38066300 |
| H | 3.50286800 | 5.20251300  | -1.17627200 |
| C | 3.97720000 | 3.59417600  | -2.59201100 |
| H | 3.95567700 | 4.06804600  | -3.56260400 |
| C | 4.62513100 | -3.16898600 | -1.24351100 |
| C | 3.70558400 | -1.11188600 | 3.10072200  |
| C | 3.61592100 | 3.30586500  | 0.98946700  |
| C | 4.44019500 | 1.23516600  | -3.36796500 |
| C | 4.84843400 | -4.57095800 | -1.74201300 |
| C | 6.14058900 | -4.98116500 | -2.09030600 |
| H | 6.95553400 | -4.27198300 | -1.97224200 |
| C | 6.39553700 | -6.26243700 | -2.57742500 |
| H | 7.40833600 | -6.55611000 | -2.83819800 |
| C | 5.33477800 | -7.15519900 | -2.72522600 |
| H | 5.51228900 | -8.15703800 | -3.10713300 |
| C | 4.03481400 | -6.78110500 | -2.39140400 |
| H | 3.20741600 | -7.46569800 | -2.51220900 |
| C | 3.78188800 | -5.49212700 | -1.89460700 |
| C | 3.47362300 | -1.62155700 | 4.49082300  |
| C | 4.51178000 | -2.21256200 | 5.22828500  |
| H | 5.49943200 | -2.29301100 | 4.78233400  |
| C | 4.29072800 | -2.68683900 | 6.52200100  |
| H | 5.10925400 | -3.13721700 | 7.07750700  |
| C | 3.02592400 | -2.57800700 | 7.10286900  |
| H | 2.85416300 | -2.94618100 | 8.11082200  |
| C | 1.98385200 | -1.99238000 | 6.38131000  |
| H | 0.99353000 | -1.90311400 | 6.82007700  |
| C | 2.20626900 | -1.51992800 | 5.08744900  |
| H | 1.39004500 | -1.07075200 | 4.52844600  |
| C | 3.38269800 | 4.70655400  | 1.46841700  |
| C | 4.41695000 | 5.65564200  | 1.42906200  |
| H | 5.39193400 | 5.36126800  | 1.05035800  |
| C | 4.20867700 | 6.96043300  | 1.87722000  |

|    |             |             |             |
|----|-------------|-------------|-------------|
| H  | 5.02446100  | 7.67803100  | 1.84386400  |
| C  | 2.95952900  | 7.34128300  | 2.37072800  |
| H  | 2.79683800  | 8.35738600  | 2.72036300  |
| C  | 1.92045200  | 6.40951000  | 2.41169600  |
| H  | 0.94064200  | 6.69715100  | 2.78243200  |
| C  | 2.13084600  | 5.10431400  | 1.96412400  |
| H  | 1.31631100  | 4.38579600  | 1.99087400  |
| C  | 4.52804300  | 1.74041800  | -4.77639100 |
| C  | 3.52098300  | 1.45119300  | -5.71100700 |
| H  | 2.66827400  | 0.85285600  | -5.40180100 |
| C  | 3.60232100  | 1.92673900  | -7.02040900 |
| H  | 2.81009700  | 1.69504800  | -7.72750800 |
| C  | 4.69340100  | 2.70080600  | -7.41969500 |
| H  | 4.75718000  | 3.07091500  | -8.43940600 |
| C  | 5.70147900  | 2.99673600  | -6.50050400 |
| H  | 6.55648400  | 3.59588100  | -6.80286400 |
| C  | 5.61824800  | 2.52136500  | -5.19115300 |
| H  | 6.40637400  | 2.75074300  | -4.47910300 |
| C  | 1.31233600  | -5.77804300 | -1.49879400 |
| C  | 0.16149300  | -5.07224500 | -0.82788800 |
| C  | -1.13131800 | -5.48537900 | -1.16753100 |
| H  | -1.26571700 | -6.27736600 | -1.89572500 |
| C  | 0.33212200  | -4.09155100 | 0.16150500  |
| H  | 1.32445000  | -3.80238700 | 0.49638000  |
| C  | -0.78035100 | -3.52809900 | 0.78615800  |
| H  | -0.64130200 | -2.79829100 | 1.57909700  |
| O  | 1.17548900  | -6.89894700 | -1.97577600 |
| Zn | -4.51306500 | 0.75941600  | 0.31620600  |
| N  | -4.96295800 | -0.95205600 | 1.41700500  |
| N  | -5.83249500 | 0.04883400  | -1.16489100 |
| N  | -4.77552000 | 2.66719900  | -0.49344800 |
| N  | -3.91530200 | 1.66284400  | 2.09000400  |
| C  | -4.56287400 | -1.21763000 | 2.70460900  |
| C  | -5.65468600 | -2.05787800 | 0.98302200  |
| C  | -6.32541400 | -1.22759200 | -1.27769300 |
| C  | -6.18167600 | 0.70682200  | -2.31957200 |
| C  | -5.30336000 | 2.97117900  | -1.72442500 |
| C  | -4.27475600 | 3.83871700  | 0.02042400  |
| C  | -3.47376100 | 2.95727100  | 2.21983600  |
| C  | -3.55494000 | 1.00509700  | 3.24166900  |
| C  | -5.02513500 | -2.53274600 | 3.09798700  |
| H  | -4.88190600 | -2.98170300 | 4.07013000  |
| C  | -5.70059700 | -3.05083100 | 2.03539600  |
| H  | -6.20888500 | -4.00293900 | 1.97357900  |

|   |             |             |             |
|---|-------------|-------------|-------------|
| C | -6.98200900 | -1.39060100 | -2.55903000 |
| H | -7.45569300 | -2.29628800 | -2.90876500 |
| C | -6.90287600 | -0.19257400 | -3.19754300 |
| H | -7.30664100 | 0.06765100  | -4.16526700 |
| C | -5.12269600 | 4.38133200  | -1.99970800 |
| H | -5.44239100 | 4.89036900  | -2.89725100 |
| C | -4.50174000 | 4.91990400  | -0.91629800 |
| H | -4.22925400 | 5.95334400  | -0.75923200 |
| C | -2.78309700 | 3.11262800  | 3.48201200  |
| H | -2.31956900 | 4.02218600  | 3.83543900  |
| C | -2.82823500 | 1.90628300  | 4.11059300  |
| H | -2.40678400 | 1.64847400  | 5.07119400  |
| C | -6.24535300 | -2.22813000 | -0.28798600 |
| C | -5.93299100 | 2.06438300  | -2.60173500 |
| C | -3.64591900 | 3.98798500  | 1.27307100  |
| C | -3.85220100 | -0.33931300 | 3.54828000  |
| C | -6.84499100 | -3.56913900 | -0.60794300 |
| C | -8.23446000 | -3.72800400 | -0.66485400 |
| H | -8.86092100 | -2.86732300 | -0.44777500 |
| C | -8.81530200 | -4.95382700 | -0.98958800 |
| H | -9.89658500 | -5.05183800 | -1.02459400 |
| C | -7.99333900 | -6.04534800 | -1.26874300 |
| H | -8.43004800 | -7.00593900 | -1.52886500 |
| C | -6.60575400 | -5.92519400 | -1.21887600 |
| H | -5.96147300 | -6.76455900 | -1.44088600 |
| C | -6.02485300 | -4.69348600 | -0.88183500 |
| C | -6.40676800 | 2.59041000  | -3.92417600 |
| C | -7.50441200 | 3.46182700  | -4.00206400 |
| H | -8.01510300 | 3.75245500  | -3.08818200 |
| C | -7.94574000 | 3.94679800  | -5.23395700 |
| H | -8.80007000 | 4.61761000  | -5.27343900 |
| C | -7.29811300 | 3.56722600  | -6.41114100 |
| H | -7.64224600 | 3.94410000  | -7.37060000 |
| C | -6.20703800 | 2.69886300  | -6.34801900 |
| H | -5.69522300 | 2.39856300  | -7.25870000 |
| C | -5.76620200 | 2.21552600  | -5.11524000 |
| H | -4.91435800 | 1.54230600  | -5.06948600 |
| C | -3.14310500 | 5.35243900  | 1.63471500  |
| C | -3.73776100 | 6.08183300  | 2.67731800  |
| H | -4.57061300 | 5.64402800  | 3.22026400  |
| C | -3.28078300 | 7.35738800  | 3.01011500  |
| H | -3.75963700 | 7.90741300  | 3.81609000  |
| C | -2.21984100 | 7.92939900  | 2.30524800  |
| H | -1.86732400 | 8.92532600  | 2.56042500  |

|   |             |             |             |
|---|-------------|-------------|-------------|
| C | -1.61845500 | 7.21542800  | 1.26638000  |
| H | -0.78975400 | 7.64909300  | 0.71303200  |
| C | -2.07574000 | 5.93834500  | 0.93617900  |
| H | -1.60298000 | 5.38502300  | 0.12949200  |
| C | -3.41053900 | -0.86887000 | 4.87758000  |
| C | -2.47550900 | -1.91379800 | 4.95658400  |
| H | -2.07004300 | -2.33225700 | 4.03943400  |
| C | -2.06416900 | -2.41833700 | 6.19122900  |
| H | -1.34175500 | -3.22975300 | 6.22680900  |
| C | -2.58068700 | -1.88488600 | 7.37388500  |
| H | -2.26505200 | -2.27925700 | 8.33614600  |
| C | -3.51248500 | -0.84684000 | 7.31117300  |
| H | -3.92793000 | -0.43123400 | 8.22552000  |
| C | -3.92368400 | -0.34521200 | 6.07585900  |
| H | -4.65858600 | 0.45352500  | 6.03176500  |
| C | -3.61049400 | -5.41941500 | -0.97018900 |
| C | -2.25100500 | -4.90336700 | -0.56702300 |
| C | -2.06777500 | -3.92460500 | 0.42414600  |
| H | -2.91693800 | -3.51468000 | 0.96502400  |
| O | -3.75606600 | -6.54845300 | -1.42464000 |
| N | -4.63097800 | -4.51599700 | -0.78265300 |
| N | 2.49275000  | -5.06700900 | -1.51724800 |
| H | -4.35859100 | -3.58696000 | -0.49381900 |
| H | 2.44865900  | -4.10931700 | -1.19615400 |
| C | -0.11110300 | -0.48269100 | -2.39834400 |
| C | -0.74818700 | 0.90109900  | -2.19669600 |
| H | 0.71550600  | -0.65033300 | -1.69880900 |
| H | -0.83331600 | -1.29820300 | -2.27059500 |
| C | 0.29574500  | 2.01544400  | -2.36103300 |
| H | -1.49855800 | 1.04189900  | -2.99239900 |
| C | -1.52686500 | 1.04702900  | -0.86200700 |
| H | -0.15102200 | 3.00686000  | -2.21777200 |
| H | 1.12025500  | 1.90771200  | -1.64818400 |
| H | -1.90116700 | 2.07705300  | -0.82141000 |
| C | -0.69816700 | 0.78406400  | 0.39670300  |
| N | -2.74314500 | 0.18290300  | -0.82215900 |
| H | -1.29448100 | 0.97517000  | 1.29331000  |
| H | -0.34730100 | -0.25463500 | 0.43378400  |
| H | 0.18311400  | 1.43100600  | 0.43120800  |
| H | -3.16460800 | 0.14841800  | -1.75215000 |
| H | -2.47473600 | -0.77851200 | -0.60620200 |
| H | 0.29889800  | -0.56875400 | -3.41083900 |
| H | 0.73236500  | 1.99054600  | -3.36565500 |
| H | 6.91812500  | -0.58495700 | -0.63862600 |



|   |             |             |             |
|---|-------------|-------------|-------------|
| N | 6.70165500  | 0.03626300  | 0.14291800  |
| C | 7.57450100  | 1.24145900  | 0.07869900  |
| H | 6.90545800  | -0.49970100 | 0.98750700  |
| C | 9.03557300  | 0.89135500  | -0.31277800 |
| H | 7.16215600  | 1.85597300  | -0.73100700 |
| C | 7.42962300  | 2.01910500  | 1.38824100  |
| C | 9.77233500  | 0.04050800  | 0.73349200  |
| C | 9.84264100  | 2.15128000  | -0.66206000 |
| H | 8.96114000  | 0.29175500  | -1.23455900 |
| H | 6.38321300  | 2.28386600  | 1.56071300  |
| H | 7.77389900  | 1.43075500  | 2.24755100  |
| H | 8.01314700  | 2.94419800  | 1.36183800  |
| H | 9.94409400  | 0.60014200  | 1.66013200  |
| H | 9.22131300  | -0.87272800 | 0.98890700  |
| H | 10.75163100 | -0.26928800 | 0.35225300  |
| H | 9.32331700  | 2.76639500  | -1.40673500 |
| H | 10.02239500 | 2.77360500  | 0.22221500  |
| H | 10.82050400 | 1.88079400  | -1.07588900 |

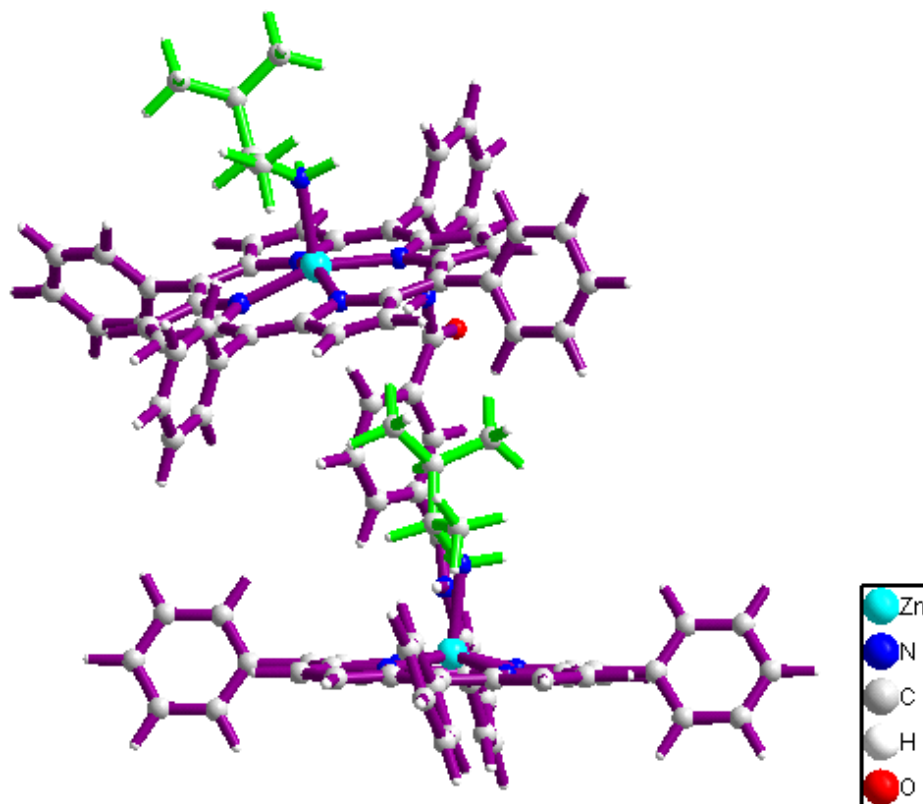

“inside-outside” **Conformer II•5S**  
 $\Delta H^\circ = -8457.10850551$  hartree

Cartesian coordinates for Geometry Optimized “inside-outside” **Conformer II•5S**

| Atoms | x           | y           | z           |
|-------|-------------|-------------|-------------|
| Zn    | -4.91837300 | 0.47914500  | -0.59325500 |
| N     | -4.18210700 | -0.27675400 | -2.40459800 |
| N     | -5.02154900 | -1.51510400 | 0.08461400  |
| N     | -4.92099400 | 1.06407200  | 1.39957800  |
| N     | -4.04694700 | 2.29642400  | -1.07941200 |
| C     | -3.67776100 | 0.46017200  | -3.44997400 |
| C     | -4.23663800 | -1.58070300 | -2.83452200 |
| C     | -5.04442700 | -2.63360300 | -0.71409100 |
| C     | -5.43158500 | -1.91742000 | 1.33406400  |
| C     | -5.29309600 | 0.30054300  | 2.47998400  |
| C     | -4.73117600 | 2.34276100  | 1.86688200  |
| C     | -4.00569000 | 3.41036200  | -0.27501900 |
| C     | -3.59866300 | 2.68726500  | -2.31779100 |
| C     | -3.39245000 | -0.41292700 | -4.57061300 |
| H     | -2.96482600 | -0.10166700 | -5.51265500 |

|   |             |             |             |
|---|-------------|-------------|-------------|
| C | -3.74271600 | -1.67211000 | -4.19254100 |
| H | -3.66041500 | -2.58445800 | -4.76606000 |
| C | -5.49475100 | -3.77672300 | 0.05215600  |
| H | -5.61350200 | -4.77981400 | -0.33260300 |
| C | -5.73505500 | -3.33433600 | 1.31647700  |
| H | -6.09063400 | -3.91021500 | 2.15842200  |
| C | -5.33961800 | 1.12669400  | 3.66768600  |
| H | -5.58416200 | 0.78092300  | 4.66146800  |
| C | -5.00333700 | 2.38899900  | 3.28728800  |
| H | -4.93292900 | 3.26885500  | 3.91003100  |
| C | -3.52871400 | 4.54480900  | -1.03641500 |
| H | -3.38751100 | 5.54329200  | -0.64877200 |
| C | -3.28944800 | 4.10162000  | -2.30041300 |
| H | -2.92512500 | 4.67369800  | -3.14114800 |
| C | -4.67659100 | -2.68421900 | -2.07583900 |
| C | -5.56036600 | -1.08483100 | 2.46374100  |
| C | -4.32796100 | 3.45172400  | 1.09629600  |
| C | -3.43013400 | 1.84696600  | -3.43831200 |
| C | -4.76726600 | -4.01379900 | -2.77242100 |
| C | -5.83475200 | -4.26697400 | -3.64143100 |
| H | -6.57206400 | -3.48340000 | -3.79450700 |
| C | -5.96962000 | -5.49060100 | -4.29605100 |
| H | -6.81020000 | -5.66399400 | -4.96192200 |
| C | -5.01548900 | -6.48421100 | -4.08030400 |
| H | -5.10427000 | -7.44514900 | -4.58005700 |
| C | -3.93360800 | -6.26372300 | -3.23017400 |
| H | -3.18691200 | -7.02722700 | -3.06592300 |
| C | -3.79913300 | -5.02936800 | -2.57427800 |
| C | -5.99820700 | -1.72047200 | 3.74824800  |
| C | -7.24028100 | -1.40248900 | 4.32043300  |
| H | -7.88731800 | -0.68889900 | 3.81760200  |
| C | -7.65154800 | -1.99495200 | 5.51490100  |
| H | -8.61930400 | -1.73853600 | 5.93809700  |
| C | -6.82628600 | -2.91703300 | 6.16112400  |
| H | -7.14577800 | -3.37938100 | 7.09117100  |
| C | -5.58762300 | -3.24123700 | 5.60477000  |
| H | -4.93595200 | -3.95453200 | 6.10252900  |
| C | -5.17793600 | -2.64839400 | 4.40985700  |
| H | -4.21072700 | -2.89919200 | 3.98325600  |
| C | -4.20009100 | 4.77318300  | 1.79479300  |
| C | -5.11689200 | 5.80681900  | 1.54925400  |
| H | -5.93076800 | 5.63833300  | 0.84917700  |
| C | -4.99712500 | 7.03774100  | 2.19606800  |
| H | -5.71971800 | 7.82441100  | 1.99486100  |

|    |             |             |             |
|----|-------------|-------------|-------------|
| C  | -3.95660200 | 7.25665600  | 3.10056300  |
| H  | -3.86262200 | 8.21484100  | 3.60453000  |
| C  | -3.03689300 | 6.23703600  | 3.35282100  |
| H  | -2.22033800 | 6.39923000  | 4.05155400  |
| C  | -3.15776800 | 5.00665100  | 2.70543000  |
| H  | -2.43674600 | 4.21733000  | 2.89930300  |
| C  | -2.92245700 | 2.46676200  | -4.70566000 |
| C  | -1.60919100 | 2.95470200  | -4.79840300 |
| H  | -0.95319900 | 2.87785500  | -3.93566900 |
| C  | -1.13976100 | 3.52644600  | -5.98161400 |
| H  | -0.11810300 | 3.89361100  | -6.03370900 |
| C  | -1.97589100 | 3.62124000  | -7.09557100 |
| H  | -1.61063700 | 4.06647200  | -8.01709600 |
| C  | -3.28343700 | 3.13865300  | -7.01830200 |
| H  | -3.94294200 | 3.20985000  | -7.87933200 |
| C  | -3.75102400 | 2.56644300  | -5.83452500 |
| H  | -4.77062300 | 2.19514500  | -5.77726300 |
| C  | -1.69351600 | -5.55661900 | -1.30306900 |
| C  | -0.72070300 | -4.92578500 | -0.33834100 |
| C  | 0.52929600  | -5.54087600 | -0.21815600 |
| H  | 0.73687200  | -6.43671200 | -0.79215700 |
| C  | -1.00922800 | -3.80387400 | 0.45471800  |
| H  | -1.99225500 | -3.34038700 | 0.43803700  |
| C  | -0.04689100 | -3.29805100 | 1.32900800  |
| H  | -0.28864800 | -2.44923500 | 1.96250300  |
| O  | -1.54240000 | -6.71216500 | -1.68451000 |
| Zn | 5.02354100  | 0.50751300  | 0.53700100  |
| N  | 4.82052400  | -0.83980300 | 2.13312800  |
| N  | 6.15228800  | -0.96863500 | -0.44164000 |
| N  | 5.95130800  | 1.90992700  | -0.69011900 |
| N  | 4.58678200  | 2.03819000  | 1.86795600  |
| C  | 4.22242400  | -0.57426000 | 3.34056900  |
| C  | 5.18496900  | -2.16485700 | 2.15776100  |
| C  | 6.29545500  | -2.28527600 | -0.07956300 |
| C  | 6.74373100  | -0.83416500 | -1.67404300 |
| C  | 6.53138100  | 1.64611400  | -1.90718100 |
| C  | 5.79750100  | 3.27247400  | -0.61400900 |
| C  | 4.65856500  | 3.38605400  | 1.61029900  |
| C  | 3.99923800  | 1.90326200  | 3.10306100  |
| C  | 4.18958800  | -1.77724300 | 4.14673900  |
| H  | 3.79619800  | -1.84675300 | 5.15071500  |
| C  | 4.79436800  | -2.75761900 | 3.42043500  |
| H  | 4.98966600  | -3.77834300 | 3.71896600  |
| C  | 6.98441000  | -3.01101100 | -1.12698800 |

|   |             |             |             |
|---|-------------|-------------|-------------|
| H | 7.23082600  | -4.06253800 | -1.10097000 |
| C | 7.26102400  | -2.11487400 | -2.11176500 |
| H | 7.78644700  | -2.29428800 | -3.03851900 |
| C | 6.72718000  | 2.88339100  | -2.63344800 |
| H | 7.14658500  | 2.96866900  | -3.62526500 |
| C | 6.28288900  | 3.88823200  | -1.83133600 |
| H | 6.26993500  | 4.94685500  | -2.04635900 |
| C | 4.09165800  | 4.12508200  | 2.71824100  |
| H | 4.03750200  | 5.20149300  | 2.79050800  |
| C | 3.66656000  | 3.20962800  | 3.63024800  |
| H | 3.19067000  | 3.39912900  | 4.58128000  |
| C | 5.85831700  | -2.86049300 | 1.13151900  |
| C | 6.89599800  | 0.37140200  | -2.38847300 |
| C | 5.21394500  | 3.97909700  | 0.45781300  |
| C | 3.78984400  | 0.68982500  | 3.78891400  |
| C | 6.20199400  | -4.30660100 | 1.36365000  |
| C | 7.52587400  | -4.65653000 | 1.65777800  |
| H | 8.26236400  | -3.86172600 | 1.73530700  |
| C | 7.90643800  | -5.98456500 | 1.84449400  |
| H | 8.94033600  | -6.22848400 | 2.07157400  |
| C | 6.94633600  | -6.98973700 | 1.73194500  |
| H | 7.22558800  | -8.03120500 | 1.86782000  |
| C | 5.61889600  | -6.67798200 | 1.44655800  |
| H | 4.87305500  | -7.45374600 | 1.34618100  |
| C | 5.23729100  | -5.33878200 | 1.26849800  |
| C | 7.53308900  | 0.29277100  | -3.74269800 |
| C | 8.80650800  | 0.83665400  | -3.97577500 |
| H | 9.33515500  | 1.31607800  | -3.15665500 |
| C | 9.39812400  | 0.75689600  | -5.23700100 |
| H | 10.38709600 | 1.17933700  | -5.39502800 |
| C | 8.72748600  | 0.13131100  | -6.28967200 |
| H | 9.18863100  | 0.06895800  | -7.27175500 |
| C | 7.46187700  | -0.41576700 | -6.07162700 |
| H | 6.93058900  | -0.90365000 | -6.88473500 |
| C | 6.87179900  | -0.33586300 | -4.80963900 |
| H | 5.88533500  | -0.76079600 | -4.64485500 |
| C | 5.18568500  | 5.47475500  | 0.36446700  |
| C | 6.37691800  | 6.21662000  | 0.41008700  |
| H | 7.32207000  | 5.69251000  | 0.52087000  |
| C | 6.35631500  | 7.60925400  | 0.32453200  |
| H | 7.28959400  | 8.16483300  | 0.36708100  |
| C | 5.14301700  | 8.28688600  | 0.19133800  |
| H | 5.12658700  | 9.37152000  | 0.12500000  |
| C | 3.95099100  | 7.56180500  | 0.14419300  |

|   |             |             |             |
|---|-------------|-------------|-------------|
| H | 3.00134900  | 8.07953700  | 0.03590700  |
| C | 3.97283600  | 6.16915000  | 0.23013200  |
| H | 3.04323500  | 5.60833500  | 0.18724300  |
| C | 3.11895100  | 0.74893700  | 5.12857200  |
| C | 1.83032400  | 0.22192400  | 5.30569400  |
| H | 1.31836400  | -0.22085200 | 4.45548500  |
| C | 1.20238500  | 0.26767000  | 6.55123300  |
| H | 0.20199100  | -0.14168500 | 6.66591500  |
| C | 1.85478100  | 0.84019300  | 7.64447300  |
| H | 1.36715900  | 0.87542900  | 8.61505600  |
| C | 3.13862600  | 1.36486900  | 7.48355700  |
| H | 3.65761400  | 1.80598900  | 8.33061400  |
| C | 3.76471100  | 1.31879500  | 6.23735300  |
| H | 4.76719400  | 1.71973200  | 6.11691400  |
| C | 2.81845900  | -5.76120600 | 0.71901800  |
| C | 1.50776600  | -5.02181800 | 0.63386900  |
| C | 1.21301700  | -3.89295400 | 1.41348100  |
| H | 1.93944700  | -3.50644800 | 2.12456200  |
| O | 2.87722000  | -6.97042000 | 0.52871400  |
| N | 3.90072200  | -4.96529400 | 1.01833600  |
| N | -2.71966600 | -4.73736700 | -1.71662800 |
| H | 3.74287400  | -3.96661300 | 1.01577400  |
| H | -2.69924900 | -3.77974000 | -1.39337100 |
| H | 3.47310800  | -0.15937200 | -1.49791800 |
| N | 3.18643100  | -0.00246000 | -0.53052100 |
| C | 1.93949900  | 0.81507000  | -0.50150100 |
| H | 2.98742500  | -0.93015300 | -0.15241900 |
| C | 0.69810500  | 0.01596500  | -0.98116000 |
| H | 1.77837300  | 1.06127500  | 0.55547700  |
| C | 2.19058600  | 2.11760700  | -1.26265800 |
| C | 0.74062800  | -0.36427200 | -2.46982500 |
| C | -0.60738000 | 0.75006400  | -0.64037100 |
| H | 0.70103600  | -0.92126100 | -0.40211500 |
| H | 3.02530700  | 2.66526600  | -0.81929100 |
| H | 2.43413700  | 1.92723500  | -2.31487000 |
| H | 1.30676100  | 2.76198500  | -1.23348000 |
| H | 0.66175400  | 0.51807300  | -3.11555000 |
| H | 1.66096900  | -0.89766800 | -2.73890800 |
| H | -0.09918200 | -1.02190800 | -2.71861700 |
| H | -0.66003400 | 1.00257800  | 0.42569900  |
| H | -0.71115500 | 1.68140600  | -1.20833700 |
| H | -1.47797400 | 0.13140200  | -0.88182100 |
| H | -7.22803800 | -0.47483400 | -1.12388500 |
| N | -7.01229400 | 0.52035700  | -1.20664800 |

|   |              |             |             |
|---|--------------|-------------|-------------|
| C | -8.04666100  | 1.31815900  | -0.49012100 |
| H | -7.03891700  | 0.72759300  | -2.20587400 |
| C | -9.47170600  | 0.72986000  | -0.67043100 |
| H | -7.79619700  | 1.23316800  | 0.57431700  |
| C | -7.89923600  | 2.78494400  | -0.89870600 |
| C | -9.98799900  | 0.78143500  | -2.11692400 |
| C | -10.47609500 | 1.37794600  | 0.29476100  |
| H | -9.39191900  | -0.33159400 | -0.38513400 |
| H | -6.88160300  | 3.13229300  | -0.69978600 |
| H | -8.10293500  | 2.92785900  | -1.96702000 |
| H | -8.59198300  | 3.41904900  | -0.33761200 |
| H | -10.15943500 | 1.81200700  | -2.44859200 |
| H | -9.29190900  | 0.31198300  | -2.82261800 |
| H | -10.94144900 | 0.24837000  | -2.20068700 |
| H | -10.11292400 | 1.35080300  | 1.32914500  |
| H | -10.67040100 | 2.42490900  | 0.03409400  |
| H | -11.43582900 | 0.85018600  | 0.26396100  |

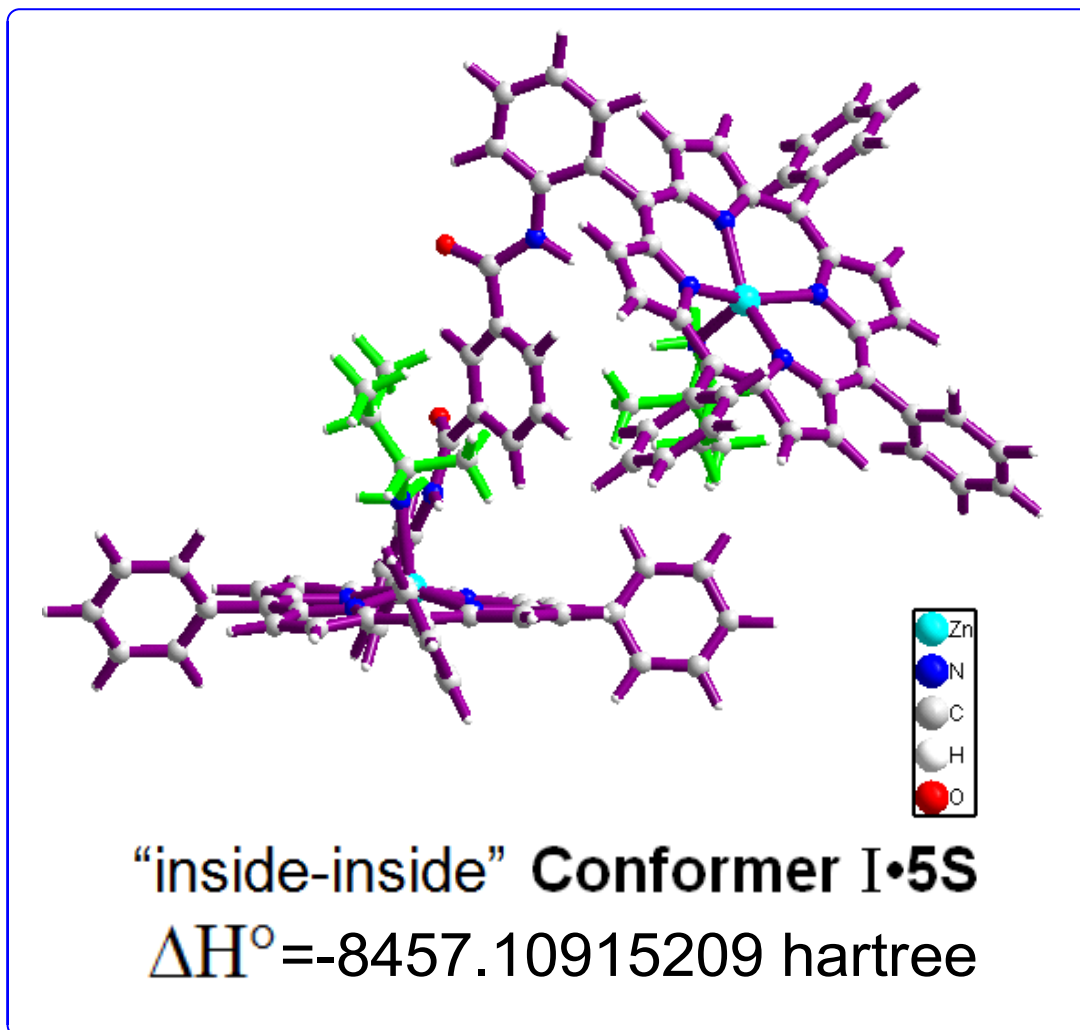

Cartesian coordinates for Geometry Optimized “inside-inside” **Conformer I•5S**

| Atoms | x          | y           | z           |
|-------|------------|-------------|-------------|
| Zn    | 5.42951400 | 0.33893000  | -0.75946600 |
| N     | 4.05423500 | 0.29438100  | -2.32609000 |
| N     | 6.34378400 | -1.34534800 | -1.63264500 |
| N     | 7.22402100 | 0.68598300  | 0.24803200  |
| N     | 4.96061400 | 2.34328700  | -0.48597700 |
| C     | 3.11209500 | 1.25353100  | -2.61138600 |
| C     | 3.84885400 | -0.73631000 | -3.21115200 |
| C     | 5.75086100 | -2.20583200 | -2.52395800 |
| C     | 7.47214000 | -1.97818200 | -1.16821500 |
| C     | 8.28571100 | -0.17679000 | 0.36424300  |
| C     | 7.53937400 | 1.80053500  | 0.98703300  |
| C     | 5.52951200 | 3.18314500  | 0.44108600  |
| C     | 3.83377900 | 2.97602300  | -0.95291000 |
| C     | 2.29056300 | 0.81635700  | -3.72075700 |
| H     | 1.49549900 | 1.39185800  | -4.17303600 |



|   |             |             |             |
|---|-------------|-------------|-------------|
| C | 2.74388900  | -0.41441500 | -4.08988200 |
| H | 2.39067700  | -1.03602800 | -4.90114600 |
| C | 6.51049300  | -3.43695900 | -2.59902100 |
| H | 6.26070700  | -4.29100100 | -3.21158100 |
| C | 7.57437100  | -3.29561500 | -1.76367700 |
| H | 8.35410900  | -4.01570400 | -1.56280400 |
| C | 9.31307700  | 0.42034500  | 1.19189600  |
| H | 10.26996200 | -0.02601600 | 1.42019600  |
| C | 8.85229300  | 1.64069100  | 1.57662400  |
| H | 9.36200000  | 2.37882400  | 2.17862500  |
| C | 4.70828300  | 4.36473200  | 0.59701700  |
| H | 4.90875700  | 5.18236400  | 1.27391900  |
| C | 3.66248400  | 4.23849300  | -0.26627800 |
| H | 2.85054400  | 4.93299300  | -0.42669100 |
| C | 4.58789600  | -1.93788900 | -3.27491200 |
| C | 8.39752800  | -1.44237100 | -0.24971300 |
| C | 6.73872800  | 2.95203200  | 1.12943000  |
| C | 2.96927200  | 2.49137900  | -1.95530400 |
| C | 4.10495600  | -3.01708400 | -4.20415300 |
| C | 4.80227200  | -3.30744100 | -5.38233300 |
| H | 5.67526400  | -2.70840000 | -5.62588300 |
| C | 4.40139800  | -4.33980000 | -6.23071800 |
| H | 4.95912100  | -4.54433500 | -7.14012700 |
| C | 3.28494800  | -5.10551200 | -5.89539700 |
| H | 2.96583500  | -5.91863700 | -6.54193600 |
| C | 2.56266200  | -4.84198800 | -4.73279600 |
| H | 1.70194000  | -5.43757000 | -4.46036900 |
| C | 2.96124300  | -3.79483100 | -3.88980000 |
| C | 9.60351000  | -2.26606100 | 0.08345800  |
| C | 10.56744300 | -2.56078700 | -0.89438700 |
| H | 10.43372600 | -2.17629600 | -1.90156000 |
| C | 11.69115600 | -3.32679800 | -0.58258700 |
| H | 12.42829800 | -3.53891800 | -1.35263100 |
| C | 11.87191200 | -3.81400200 | 0.71321200  |
| H | 12.74664200 | -4.41149000 | 0.95572500  |
| C | 10.92237100 | -3.52773000 | 1.69565800  |
| H | 11.05229000 | -3.90526100 | 2.70659300  |
| C | 9.80017500  | -2.75972300 | 1.38319600  |
| H | 9.06128000  | -2.54223400 | 2.14961000  |
| C | 7.22992600  | 4.02306000  | 2.05430300  |
| C | 7.61641500  | 5.28038200  | 1.56221000  |
| H | 7.56183700  | 5.46986300  | 0.49393000  |
| C | 8.07841200  | 6.27501200  | 2.42480700  |
| H | 8.37850000  | 7.23911000  | 2.02251400  |

|    |             |             |             |
|----|-------------|-------------|-------------|
| C  | 8.16215000  | 6.03178100  | 3.79703200  |
| H  | 8.52181100  | 6.80644700  | 4.46897000  |
| C  | 7.78271200  | 4.78601700  | 4.30003000  |
| H  | 7.84159400  | 4.58749700  | 5.36707000  |
| C  | 7.32259100  | 3.79154400  | 3.43615600  |
| H  | 7.02514500  | 2.82433100  | 3.83204900  |
| C  | 1.83703200  | 3.37951200  | -2.37793100 |
| C  | 0.50874000  | 3.06411400  | -2.05342900 |
| H  | 0.30170800  | 2.15933200  | -1.48784300 |
| C  | -0.54177400 | 3.90166300  | -2.43254600 |
| H  | -1.56154600 | 3.65211400  | -2.15178700 |
| C  | -0.27936500 | 5.06750700  | -3.15413700 |
| H  | -1.09558300 | 5.72086100  | -3.45061200 |
| C  | 1.03661400  | 5.39095700  | -3.49016400 |
| H  | 1.24894200  | 6.29475600  | -4.05541700 |
| C  | 2.08537400  | 4.55620300  | -3.10250600 |
| H  | 3.10870600  | 4.80993400  | -3.36482400 |
| C  | 1.15950500  | -4.04923800 | -2.13862100 |
| C  | 0.57712100  | -3.24799500 | -1.00021200 |
| C  | -0.02984100 | -3.93407200 | 0.05695000  |
| H  | -0.03794300 | -5.01881000 | 0.05918800  |
| C  | 0.57873100  | -1.84304600 | -1.00296300 |
| H  | 1.00305600  | -1.29191600 | -1.83838900 |
| C  | -0.00849800 | -1.14123400 | 0.05036200  |
| H  | -0.00001600 | -0.05452700 | 0.04806000  |
| O  | 0.67649600  | -5.12182100 | -2.48233200 |
| Zn | -5.43221800 | 0.36944900  | 0.75952700  |
| N  | -4.08691700 | 0.34848500  | 2.35088500  |
| N  | -6.33966400 | -1.32433600 | 1.61695700  |
| N  | -7.21880700 | 0.70249000  | -0.26773500 |
| N  | -4.97116800 | 2.37394600  | 0.47524500  |
| C  | -3.15037800 | 1.31294700  | 2.63751000  |
| C  | -3.89279100 | -0.67045100 | 3.25200700  |
| C  | -5.79293000 | -2.14642700 | 2.57133500  |
| C  | -7.47849500 | -1.94864500 | 1.16703900  |
| C  | -8.24936000 | -0.18935600 | -0.43513400 |
| C  | -7.49476000 | 1.77921200  | -1.07552000 |
| C  | -5.52826700 | 3.19959700  | -0.47133400 |
| C  | -3.86117500 | 3.02225500  | 0.96061800  |
| C  | -2.34121600 | 0.88930800  | 3.76091000  |
| H  | -1.55280200 | 1.47124700  | 4.21654500  |
| C  | -2.79816500 | -0.33720500 | 4.13949500  |
| H  | -2.45473900 | -0.94798500 | 4.96306600  |
| C  | -6.60078700 | -3.34106000 | 2.71276400  |

|   |              |             |             |
|---|--------------|-------------|-------------|
| H | -6.39966200  | -4.15629600 | 3.39228000  |
| C | -7.64935200  | -3.21161600 | 1.85672700  |
| H | -8.47026200  | -3.89841900 | 1.70997500  |
| C | -9.20548100  | 0.34005300  | -1.38564500 |
| H | -10.11247900 | -0.15386200 | -1.70246300 |
| C | -8.74539600  | 1.56000300  | -1.77237700 |
| H | -9.21096900  | 2.25426500  | -2.45676700 |
| C | -4.72242800  | 4.39361900  | -0.61212000 |
| H | -4.92193300  | 5.20671100  | -1.29484500 |
| C | -3.69363100  | 4.28530900  | 0.27359200  |
| H | -2.89522800  | 4.99183900  | 0.44861700  |
| C | -4.63881800  | -1.86696000 | 3.33157700  |
| C | -8.37449700  | -1.43876400 | 0.20704200  |
| C | -6.70531700  | 2.93945300  | -1.20293800 |
| C | -3.00565700  | 2.54735500  | 1.97505900  |
| C | -4.16947200  | -2.92822700 | 4.28843900  |
| C | -4.86824300  | -3.18558800 | 5.47317500  |
| H | -5.73463900  | -2.57236900 | 5.70476600  |
| C | -4.47752800  | -4.20460300 | 6.34245600  |
| H | -5.03666200  | -4.38430900 | 7.25622900  |
| C | -3.36961700  | -4.98908100 | 6.02243400  |
| H | -3.05902200  | -5.79220800 | 6.68540100  |
| C | -2.64447600  | -4.75635400 | 4.85503000  |
| H | -1.78911000  | -5.36530300 | 4.59533100  |
| C | -3.03257600  | -3.72249600 | 3.99119300  |
| C | -9.56501700  | -2.28192600 | -0.14225500 |
| C | -10.85367900 | -1.91641600 | 0.27729200  |
| H | -10.98212700 | -1.01278600 | 0.86674600  |
| C | -11.96036500 | -2.70190400 | -0.04807400 |
| H | -12.94962900 | -2.40387700 | 0.28943700  |
| C | -11.79796800 | -3.86828000 | -0.79796100 |
| H | -12.65967800 | -4.48019900 | -1.05086100 |
| C | -10.52146400 | -4.24432300 | -1.21949500 |
| H | -10.38472400 | -5.14950500 | -1.80543200 |
| C | -9.41571600  | -3.45753200 | -0.89388900 |
| H | -8.42401300  | -3.75177700 | -1.22698000 |
| C | -7.16507600  | 3.98599300  | -2.17270800 |
| C | -7.64383000  | 5.22583500  | -1.72009000 |
| H | -7.68478900  | 5.41917300  | -0.65178400 |
| C | -8.07275900  | 6.19937200  | -2.62316700 |
| H | -8.44484400  | 7.15085500  | -2.25218000 |
| C | -8.03020400  | 5.95125700  | -3.99638600 |
| H | -8.36403100  | 6.70939900  | -4.69977500 |
| C | -7.55731000  | 4.72237500  | -4.46010100 |

|   |             |             |             |
|---|-------------|-------------|-------------|
| H | -7.51759200 | 4.52058100  | -5.52741500 |
| C | -7.12961600 | 3.74931000  | -3.55590600 |
| H | -6.75787300 | 2.79560500  | -3.92069600 |
| C | -1.87775400 | 3.43931400  | 2.40136500  |
| C | -0.54752300 | 3.12185900  | 2.08675700  |
| H | -0.33753500 | 2.21453300  | 1.52641000  |
| C | 0.50104300  | 3.96026700  | 2.46903700  |
| H | 1.52247600  | 3.70783000  | 2.19661900  |
| C | 0.23453600  | 5.12965300  | 3.18342600  |
| H | 1.04905800  | 5.78390400  | 3.48259900  |
| C | -1.08348600 | 5.45536700  | 3.50921600  |
| H | -1.29891400 | 6.36187500  | 4.06892700  |
| C | -2.13030400 | 4.61927800  | 3.11890800  |
| H | -3.15513000 | 4.87458700  | 3.37382800  |
| C | -1.22462800 | -4.01917800 | 2.25226400  |
| C | -0.62710200 | -3.23396300 | 1.11027500  |
| C | -0.60706000 | -1.82914700 | 1.10649600  |
| H | -1.02488900 | -1.26792200 | 1.93842900  |
| O | -0.75365300 | -5.09207900 | 2.61101100  |
| N | -2.31606300 | -3.40619700 | 2.82002300  |
| N | 2.25176600  | -3.45240700 | -2.72183800 |
| H | -2.66014200 | -2.58338900 | 2.34443500  |
| H | 2.60734200  | -2.62691100 | -2.25959900 |
| C | -3.01527400 | -2.40280000 | -3.07922200 |
| C | -4.25051300 | -1.49766600 | -3.20555400 |
| H | -2.09584500 | -1.87309100 | -3.35317300 |
| H | -2.88490400 | -2.79535500 | -2.06395400 |
| C | -4.40987400 | -0.98342300 | -4.64452400 |
| H | -5.13790200 | -2.11362400 | -2.98658100 |
| C | -4.29005000 | -0.33392200 | -2.17904600 |
| H | -5.29308300 | -0.34111800 | -4.74592700 |
| H | -3.53455600 | -0.40803900 | -4.96800500 |
| H | -5.20335500 | 0.23877300  | -2.37902500 |
| C | -3.09888700 | 0.62358300  | -2.24509300 |
| N | -4.42814800 | -0.82315200 | -0.77710800 |
| H | -3.23249400 | 1.44101300  | -1.53065100 |
| H | -2.15903300 | 0.11037100  | -2.00784400 |
| H | -2.99995200 | 1.05903200  | -3.24363700 |
| H | -5.04500600 | -1.63728300 | -0.75946000 |
| H | -3.52361400 | -1.15499100 | -0.43883700 |
| H | -3.10484400 | -3.26589900 | -3.74767000 |
| H | -4.52492900 | -1.82107800 | -5.34139600 |
| H | 5.06719500  | -1.66888800 | 0.77266900  |
| N | 4.45128800  | -0.85392000 | 0.79184500  |

|   |            |             |            |
|---|------------|-------------|------------|
| C | 4.33185600 | -0.35593100 | 2.19255500 |
| H | 3.54210500 | -1.18751900 | 0.46824700 |
| C | 4.29732400 | -1.51446100 | 3.22525500 |
| H | 5.25089000 | 0.21255200  | 2.37831300 |
| C | 3.14669200 | 0.60845800  | 2.26777000 |
| C | 3.05731000 | -2.41515300 | 3.11496000 |
| C | 4.47233000 | -0.99404800 | 4.66022200 |
| H | 5.17972700 | -2.13566200 | 3.00073000 |
| H | 3.27734700 | 1.42385000  | 1.55058800 |
| H | 2.20165000 | 0.09993700  | 2.04122700 |
| H | 3.06040100 | 1.04638100  | 3.26642900 |
| H | 2.14216100 | -1.88031900 | 3.39322500 |
| H | 2.91721100 | -2.81336400 | 2.10322000 |
| H | 3.14929000 | -3.27454400 | 3.78781700 |
| H | 5.35744000 | -0.35256700 | 4.74994500 |
| H | 3.60148500 | -0.41545600 | 4.98987000 |
| H | 4.59258200 | -1.82881600 | 5.35969200 |

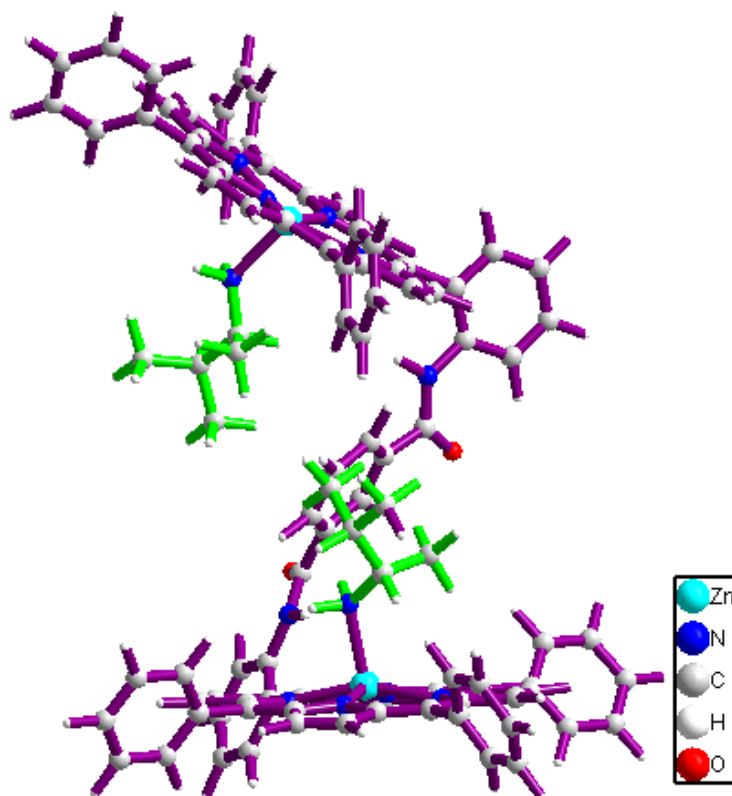

**“inside-inside” Conformer II•5S**

$\Delta H^\circ = -8457.10486736$  hartree

Cartesian coordinates for Geometry Optimized “inside-inside” **Conformer II•5S**

| Atoms | x          | y           | z           |
|-------|------------|-------------|-------------|
| Zn    | 6.40964800 | -0.01693100 | 0.47436100  |
| N     | 6.16110000 | 0.42651300  | 2.51384800  |
| N     | 5.92286500 | -1.98376900 | 0.91220800  |
| N     | 7.34197700 | -0.68195400 | -1.25453400 |
| N     | 7.53074000 | 1.74917500  | 0.32140700  |
| C     | 6.32075700 | 1.66219300  | 3.09605200  |
| C     | 5.52343700 | -0.36343400 | 3.43717200  |
| C     | 5.42819700 | -2.47325900 | 2.09687300  |
| C     | 5.99013300 | -3.04734900 | 0.04450600  |
| C     | 7.11577800 | -1.89240300 | -1.86473200 |
| C     | 8.02343500 | 0.09558300  | -2.16061500 |
| C     | 8.28018900 | 2.15051000  | -0.75749400 |
| C     | 7.59479300 | 2.76301800  | 1.24490900  |
| C     | 5.72138600 | 1.66071200  | 4.41519800  |

|   |             |             |             |
|---|-------------|-------------|-------------|
| H | 5.68335600  | 2.50500300  | 5.08810500  |
| C | 5.23756000  | 0.40702600  | 4.62937600  |
| H | 4.73428600  | 0.03378700  | 5.50985600  |
| C | 5.18342100  | -3.89521900 | 1.97525700  |
| H | 4.82096000  | -4.53680600 | 2.76590900  |
| C | 5.52519600  | -4.24845500 | 0.70756000  |
| H | 5.49610200  | -5.23433400 | 0.26710300  |
| C | 7.63545100  | -1.86237200 | -3.21496100 |
| H | 7.57354500  | -2.67074000 | -3.92867000 |
| C | 8.19942200  | -0.63703200 | -3.39582000 |
| H | 8.68338900  | -0.25960400 | -4.28474900 |
| C | 8.85273000  | 3.45449100  | -0.49679500 |
| H | 9.51388300  | 3.99218000  | -1.16077200 |
| C | 8.42544600  | 3.83500500  | 0.73763000  |
| H | 8.67299400  | 4.74130200  | 1.27096500  |
| C | 5.19763900  | -1.72642900 | 3.27139200  |
| C | 6.49020800  | -3.01034200 | -1.27200600 |
| C | 8.48778000  | 1.40876300  | -1.93880400 |
| C | 6.98862700  | 2.76205100  | 2.52018400  |
| C | 4.64683100  | -2.45544300 | 4.46480900  |
| C | 5.49062300  | -2.72630300 | 5.55012900  |
| H | 6.52361000  | -2.39544800 | 5.49221700  |
| C | 5.03701400  | -3.41179700 | 6.67564700  |
| H | 5.71491800  | -3.61519700 | 7.49969100  |
| C | 3.71002300  | -3.83772600 | 6.72460000  |
| H | 3.33943600  | -4.37659200 | 7.59251600  |
| C | 2.84076600  | -3.57957900 | 5.66704600  |
| H | 1.81393600  | -3.91499600 | 5.69733700  |
| C | 3.30080700  | -2.88885100 | 4.53503700  |
| C | 6.38271400  | -4.26433300 | -2.08383600 |
| C | 7.52956100  | -4.96832900 | -2.48580900 |
| H | 8.50809100  | -4.59597700 | -2.19586000 |
| C | 7.42256800  | -6.14009400 | -3.23565400 |
| H | 8.32223100  | -6.67376000 | -3.53103500 |
| C | 6.16636800  | -6.62997100 | -3.59818500 |
| H | 6.08296700  | -7.54295500 | -4.18170000 |
| C | 5.01788200  | -5.94153800 | -3.20341300 |
| H | 4.03523000  | -6.31407500 | -3.48045400 |
| C | 5.12584500  | -4.77068300 | -2.45225800 |
| H | 4.22958900  | -4.23665200 | -2.14910500 |
| C | 9.27725900  | 2.05970200  | -3.03302900 |
| C | 10.53456200 | 1.55998800  | -3.40942300 |
| H | 10.93566500 | 0.69340100  | -2.89152500 |
| C | 11.27129900 | 2.16882500  | -4.42602600 |

|    |             |             |             |
|----|-------------|-------------|-------------|
| H  | 12.24496600 | 1.76947200  | -4.69777700 |
| C  | 10.76449400 | 3.28927600  | -5.08698800 |
| H  | 11.33818600 | 3.76319300  | -5.87898100 |
| C  | 9.51622500  | 3.79730500  | -4.72297800 |
| H  | 9.11112900  | 4.66699200  | -5.23392700 |
| C  | 8.78145300  | 3.18850600  | -3.70498400 |
| H  | 7.80872800  | 3.58499100  | -3.42667000 |
| C  | 7.10234900  | 4.01423500  | 3.33497000  |
| C  | 6.46557700  | 5.19638000  | 2.92416900  |
| H  | 5.88157800  | 5.19173800  | 2.00772300  |
| C  | 6.56950900  | 6.36637800  | 3.67725000  |
| H  | 6.06442300  | 7.26905700  | 3.34321100  |
| C  | 7.31626900  | 6.37677900  | 4.85664200  |
| H  | 7.39901900  | 7.28753700  | 5.44371100  |
| C  | 7.95850000  | 5.21001300  | 5.27546700  |
| H  | 8.54871600  | 5.21019900  | 6.18816800  |
| C  | 7.85252600  | 4.04042400  | 4.52193100  |
| H  | 8.36132200  | 3.13702300  | 4.84603400  |
| C  | 1.22841900  | -3.12455100 | 3.13836100  |
| C  | 0.60088600  | -2.57610900 | 1.88339500  |
| C  | -0.17315700 | -3.44856300 | 1.11363500  |
| H  | -0.26005100 | -4.48871300 | 1.40706200  |
| C  | 0.71649900  | -1.23331800 | 1.49342300  |
| H  | 1.28829500  | -0.53687700 | 2.10209100  |
| C  | 0.05925800  | -0.77731400 | 0.34978000  |
| H  | 0.14544400  | 0.26432200  | 0.05339500  |
| O  | 0.66592100  | -3.99281800 | 3.79521100  |
| Zn | -6.43176900 | 0.53351100  | -0.63006200 |
| N  | -4.98740500 | 0.11734400  | -2.06315600 |
| N  | -7.02629200 | -1.46516500 | -0.73436100 |
| N  | -8.32610300 | 0.96171600  | 0.18881900  |
| N  | -6.29139200 | 2.54249200  | -1.14948300 |
| C  | -4.18873700 | 1.03276800  | -2.70543400 |
| C  | -4.63383300 | -1.12141400 | -2.54276200 |
| C  | -6.33980900 | -2.49194300 | -1.33403900 |
| C  | -8.06984200 | -2.03921400 | -0.04764900 |
| C  | -9.20823900 | 0.05306200  | 0.71851200  |
| C  | -8.81418300 | 2.20819200  | 0.49278500  |
| C  | -7.02819300 | 3.57003100  | -0.60969600 |
| C  | -5.24806600 | 3.12143500  | -1.83012300 |
| C  | -3.29251600 | 0.34668000  | -3.61219400 |
| H  | -2.57935900 | 0.82460300  | -4.26815900 |
| C  | -3.57087500 | -0.98312500 | -3.51580500 |
| H  | -3.12952300 | -1.79427800 | -4.07828100 |



|   |              |             |             |
|---|--------------|-------------|-------------|
| C | -6.95288100  | -3.75896600 | -0.99139000 |
| H | -6.61403100  | -4.72880700 | -1.32505400 |
| C | -8.02240600  | -3.47901100 | -0.20002100 |
| H | -8.72842700  | -4.17677400 | 0.22617300  |
| C | -10.29200100 | 0.75049500  | 1.37995300  |
| H | -11.12550500 | 0.28128500  | 1.88206000  |
| C | -10.05636300 | 2.08165000  | 1.22753100  |
| H | -10.66666600 | 2.90330800  | 1.57321900  |
| C | -6.40709400  | 4.83729200  | -0.93234600 |
| H | -6.76398500  | 5.80766000  | -0.61947200 |
| C | -5.30859300  | 4.56051600  | -1.68555700 |
| H | -4.60057100  | 5.26308800  | -2.10033700 |
| C | -5.22742700  | -2.35135200 | -2.18990200 |
| C | -9.08537400  | -1.35019500 | 0.64543600  |
| C | -8.21060900  | 3.43449600  | 0.14696300  |
| C | -4.26446900  | 2.43460200  | -2.57194900 |
| C | -4.70899600  | -3.60295800 | -2.84236900 |
| C | -5.48614500  | -4.22420300 | -3.82975400 |
| H | -6.42657400  | -3.75853700 | -4.11011700 |
| C | -5.08342400  | -5.40974200 | -4.44113300 |
| H | -5.70679500  | -5.86947200 | -5.20270100 |
| C | -3.87740600  | -5.99616800 | -4.05863300 |
| H | -3.54954100  | -6.92482200 | -4.51807200 |
| C | -3.07509100  | -5.40194900 | -3.08776400 |
| H | -2.14655900  | -5.86042600 | -2.77899400 |
| C | -3.47787000  | -4.20138300 | -2.48090700 |
| C | -10.13430800 | -2.17643200 | 1.32880600  |
| C | -11.44384700 | -2.23899400 | 0.82737000  |
| H | -11.69387600 | -1.68230400 | -0.07153800 |
| C | -12.41619600 | -3.01172900 | 1.46379500  |
| H | -13.42348000 | -3.05066000 | 1.05729900  |
| C | -12.09610900 | -3.73711300 | 2.61292700  |
| H | -12.85308400 | -4.33953000 | 3.10791700  |
| C | -10.79691400 | -3.68536100 | 3.12082500  |
| H | -10.53784700 | -4.24558700 | 4.01548300  |
| C | -9.82572600  | -2.91200200 | 2.48347400  |
| H | -8.81564700  | -2.87337000 | 2.88257400  |
| C | -8.88817400  | 4.69123000  | 0.60380400  |
| C | -9.48603100  | 5.56142000  | -0.32180400 |
| H | -9.45731500  | 5.31008400  | -1.37832200 |
| C | -10.11946400 | 6.73056500  | 0.10124700  |
| H | -10.58064900 | 7.38793100  | -0.63125300 |
| C | -10.16658000 | 7.05198400  | 1.45904200  |
| H | -10.65985500 | 7.96236100  | 1.78897000  |

|   |             |             |             |
|---|-------------|-------------|-------------|
| C | -9.57692600 | 6.19546200  | 2.39039500  |
| H | -9.60554900 | 6.43828300  | 3.44950100  |
| C | -8.94454000 | 5.02619000  | 1.96592400  |
| H | -8.48392800 | 4.36408000  | 2.69408500  |
| C | -3.25947700 | 3.25348800  | -3.32220600 |
| C | -1.89486100 | 3.19904900  | -2.99643000 |
| H | -1.57233400 | 2.56245600  | -2.17685100 |
| C | -0.95828800 | 3.95464800  | -3.70291400 |
| H | 0.09297500  | 3.89977100  | -3.43220000 |
| C | -1.36893900 | 4.78004000  | -4.75108300 |
| H | -0.64012900 | 5.36789000  | -5.30268900 |
| C | -2.72245500 | 4.84347300  | -5.08723300 |
| H | -3.05181300 | 5.47755100  | -5.90625000 |
| C | -3.65771100 | 4.08753300  | -4.37996700 |
| H | -4.70865700 | 4.13129900  | -4.65116900 |
| C | -1.56703900 | -4.02253100 | -0.86091400 |
| C | -0.83097300 | -2.99859500 | -0.03523800 |
| C | -0.71369700 | -1.65306400 | -0.41498000 |
| H | -1.19739500 | -1.29109300 | -1.31878100 |
| O | -1.17399700 | -5.18233900 | -0.91317400 |
| N | -2.66865900 | -3.54078200 | -1.53054000 |
| N | 2.44866800  | -2.57047600 | 3.45476400  |
| H | -2.98183700 | -2.61113900 | -1.28318000 |
| H | 2.88934300  | -2.01746600 | 2.73038300  |
| H | -5.84168400 | 1.36145300  | 1.80959100  |
| N | -5.61846900 | 0.45524400  | 1.39569700  |
| C | -4.23463400 | 0.05605800  | 1.76900100  |
| H | -6.28535900 | -0.20211200 | 1.80374800  |
| C | -4.12402000 | -0.35981600 | 3.26105500  |
| H | -4.01585400 | -0.83805100 | 1.17140700  |
| C | -3.27588300 | 1.16729300  | 1.33754800  |
| C | -4.37294800 | 0.79375500  | 4.24587800  |
| C | -2.78911200 | -1.05787100 | 3.56029200  |
| H | -4.91914100 | -1.10641400 | 3.41941100  |
| H | -3.37441800 | 1.35658200  | 0.26464600  |
| H | -3.48443800 | 2.10598500  | 1.86474000  |
| H | -2.23852100 | 0.88789300  | 1.54186000  |
| H | -3.57591000 | 1.54478200  | 4.19774100  |
| H | -5.32699600 | 1.30258500  | 4.06120100  |
| H | -4.40295600 | 0.41555300  | 5.27363700  |
| H | -2.60453600 | -1.89112300 | 2.87300800  |
| H | -1.94320300 | -0.36540500 | 3.48061600  |
| H | -2.78541500 | -1.46225100 | 4.57841800  |
| H | 4.64301500  | 1.79639900  | 0.52783700  |

|   |            |             |             |
|---|------------|-------------|-------------|
| N | 4.55515400 | 0.99384300  | -0.09760800 |
| C | 4.36183100 | 1.46270300  | -1.49824500 |
| H | 3.73135400 | 0.47909100  | 0.21557800  |
| C | 3.48017600 | 2.73770400  | -1.57586500 |
| H | 5.35982000 | 1.74653100  | -1.85189600 |
| C | 3.87181500 | 0.28434600  | -2.34215000 |
| C | 2.03102600 | 2.52190400  | -1.11355900 |
| C | 3.52334500 | 3.37035900  | -2.97507700 |
| H | 3.94283300 | 3.45964900  | -0.88386300 |
| H | 4.58144400 | -0.54545000 | -2.28154200 |
| H | 2.89416300 | -0.07896400 | -2.00105300 |
| H | 3.77694900 | 0.56702900  | -3.39455700 |
| H | 1.48786000 | 1.85415300  | -1.79304000 |
| H | 1.98315600 | 2.09147500  | -0.10574400 |
| H | 1.49110800 | 3.47495500  | -1.08419100 |
| H | 4.55518800 | 3.52194700  | -3.31398500 |
| H | 3.01519700 | 2.74553300  | -3.71881300 |
| H | 3.02755600 | 4.34795300  | -2.97194400 |
